# Supplementary material
Source: PubMed Central journal article supplement (PMC8855667)
Supplement: NIHMS1773328-supplement-Supplementary_Figures.pdf [file NIHMS1773328-supplement-Supplementary_Figures.pdf]

**Irradiation causes alterations of polyamine, purine and sulfur metabolism in red blood cells and multiple organs**

**Micaela Kalani Roy,<sup>1,#</sup> Francesca La Carpia,<sup>2,#</sup> Francesca Cendali,<sup>1</sup> Sebastian Fernando<sup>2</sup>, Chiara Moriconi<sup>2</sup>,  
Boguslaw S. Wojczyk<sup>2</sup>, Lin Wang<sup>2</sup>, Travis Nemkov,<sup>1</sup> Eldad A Hod,<sup>2</sup> Angelo D'Alessandro<sup>1\*</sup>**

<sup>1</sup> Department of Biochemistry and Molecular Genetics, University of Colorado Denver – Anschutz Medical Campus,  
Aurora, CO, USA 80045

<sup>2</sup> Columbia University Irving Medical Center, New York, NY, USA 10032

*# These authors contributed equally and share the first authorship*

**\*Corresponding authors:**

Angelo D'Alessandro, PhD  
Department of Biochemistry and Molecular Genetics  
University of Colorado Anschutz Medical Campus  
12801 East 17th Ave., Aurora, CO 80045  
Phone # 303-724-0096  
E-mail: [angelo.dalessandro@ucdenver.edu](mailto:angelo.dalessandro@ucdenver.edu)

**Table of Content:**

- **Supplementary Figure 1 – Impact of irradiation on different organs and biofluids in mice;**
- **Supplementary Figure 2 – Impact of intravenous iron supplementation and irradiation on different organs and biofluids in mice.**
- **Supplementary Table 1.xlsx – Raw data and elaborations. Uploaded as a separate file.**  
**Raw mass spectrometry data for this study are available for free download at the Metabolomics Workbench website, with the following IDs: ST002031-ST002041.**  
**DOI: <http://dx.doi.org/10.21228/M8771V>**

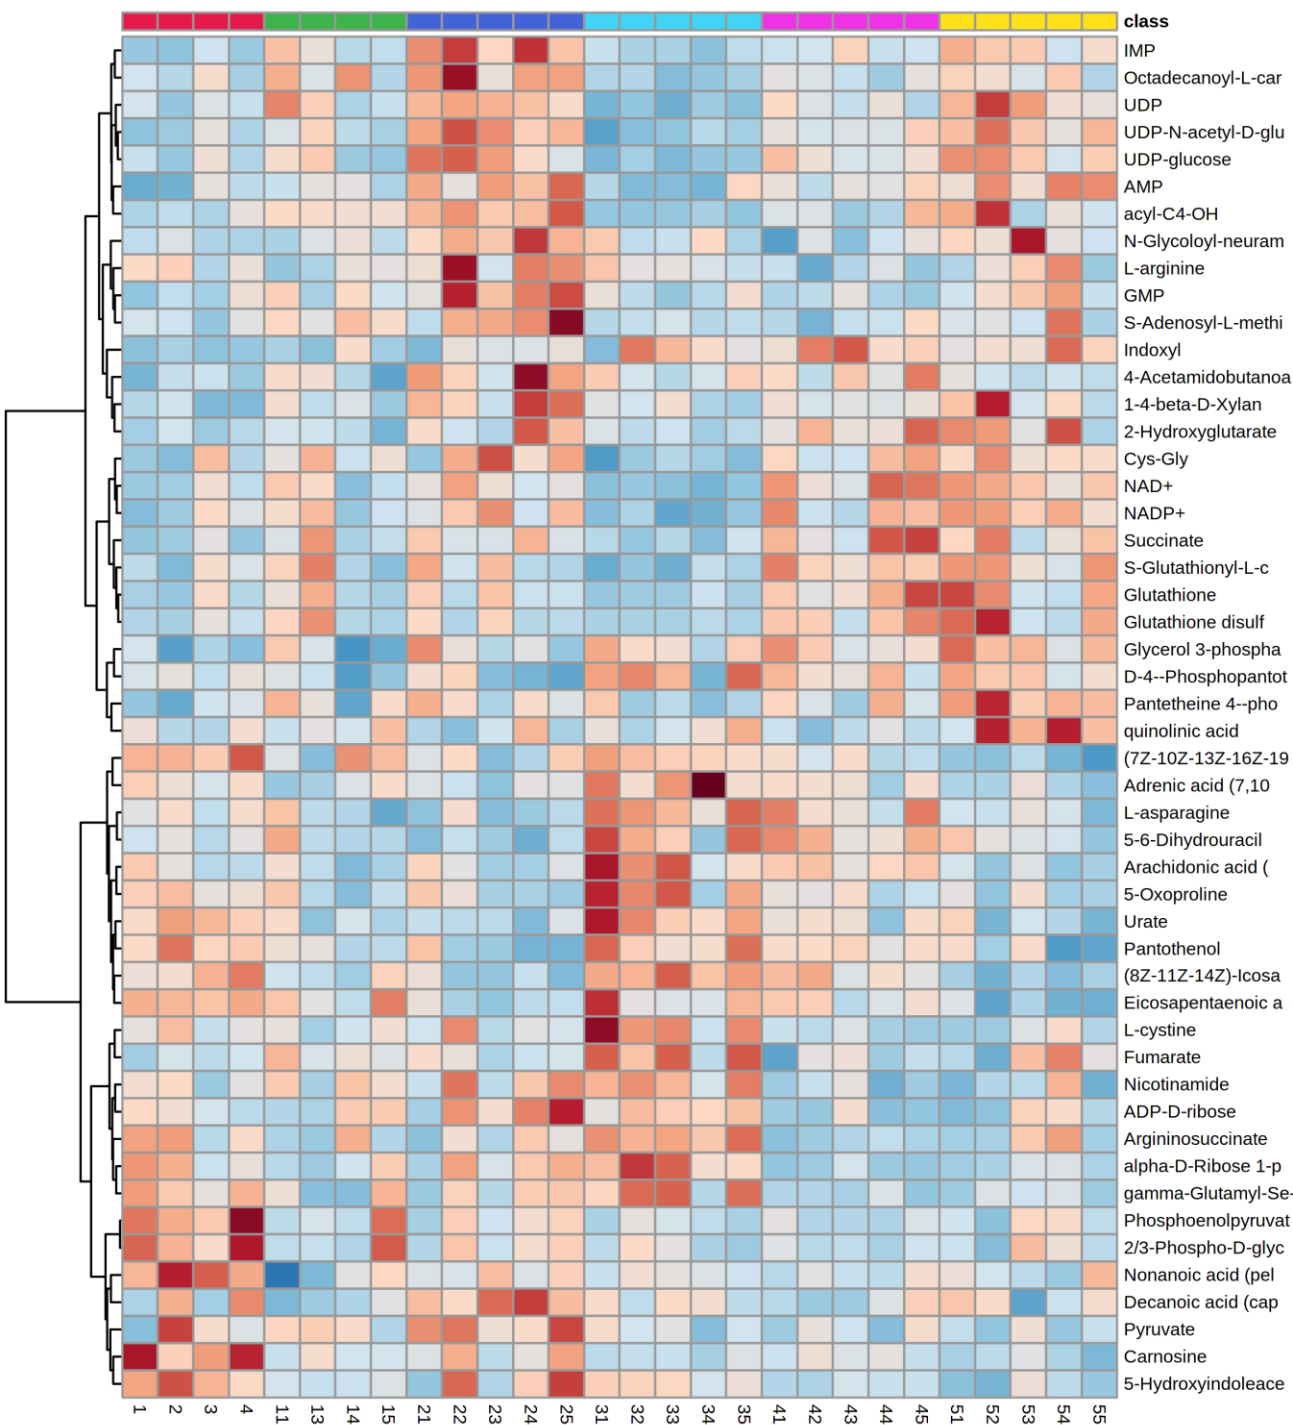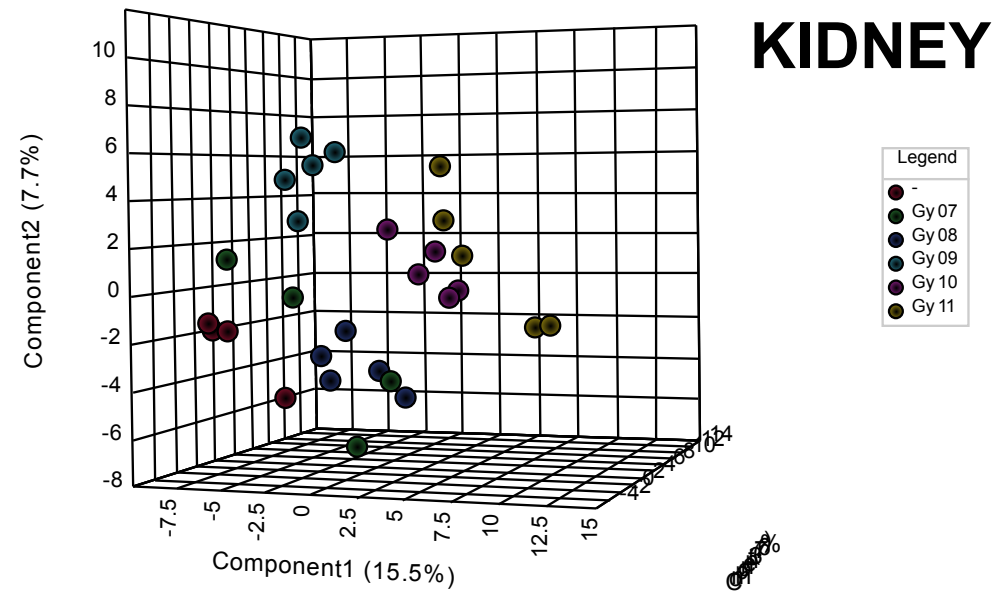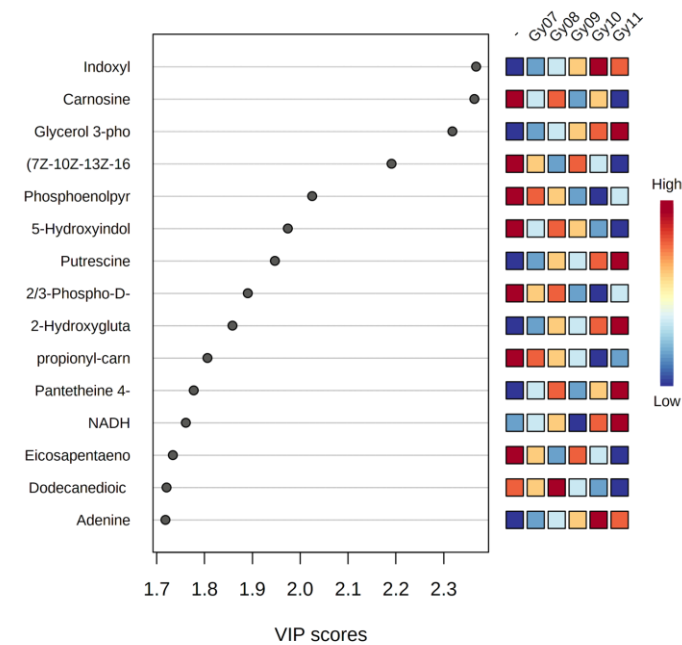

**Supp Fig 1.A** – Heat map (top 50 ANOVA), Principal Component Analysis and VIP Score plots for kidney metabolites in response to radiation.

**TCA**

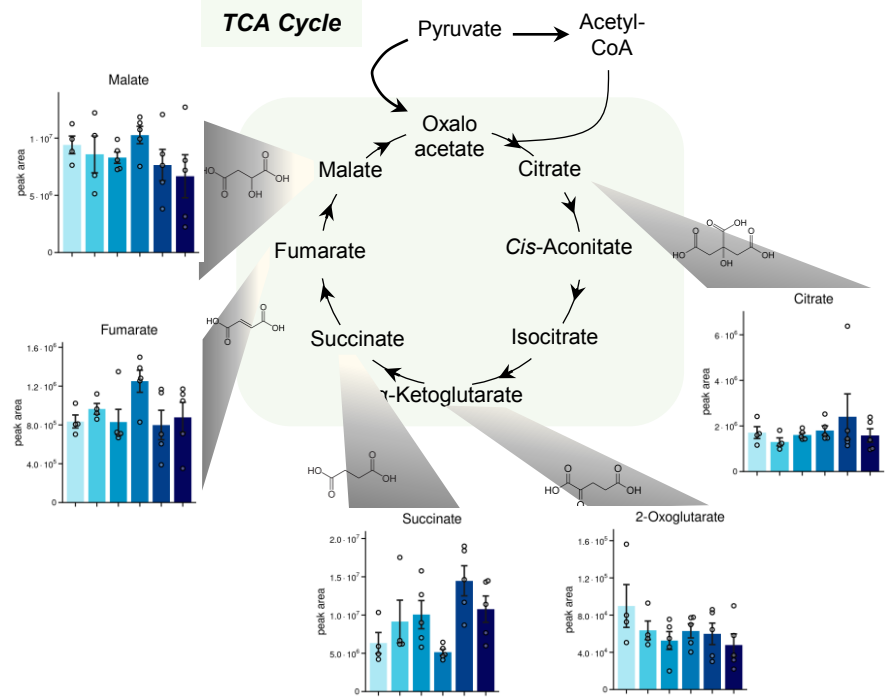

**Glycolysis**

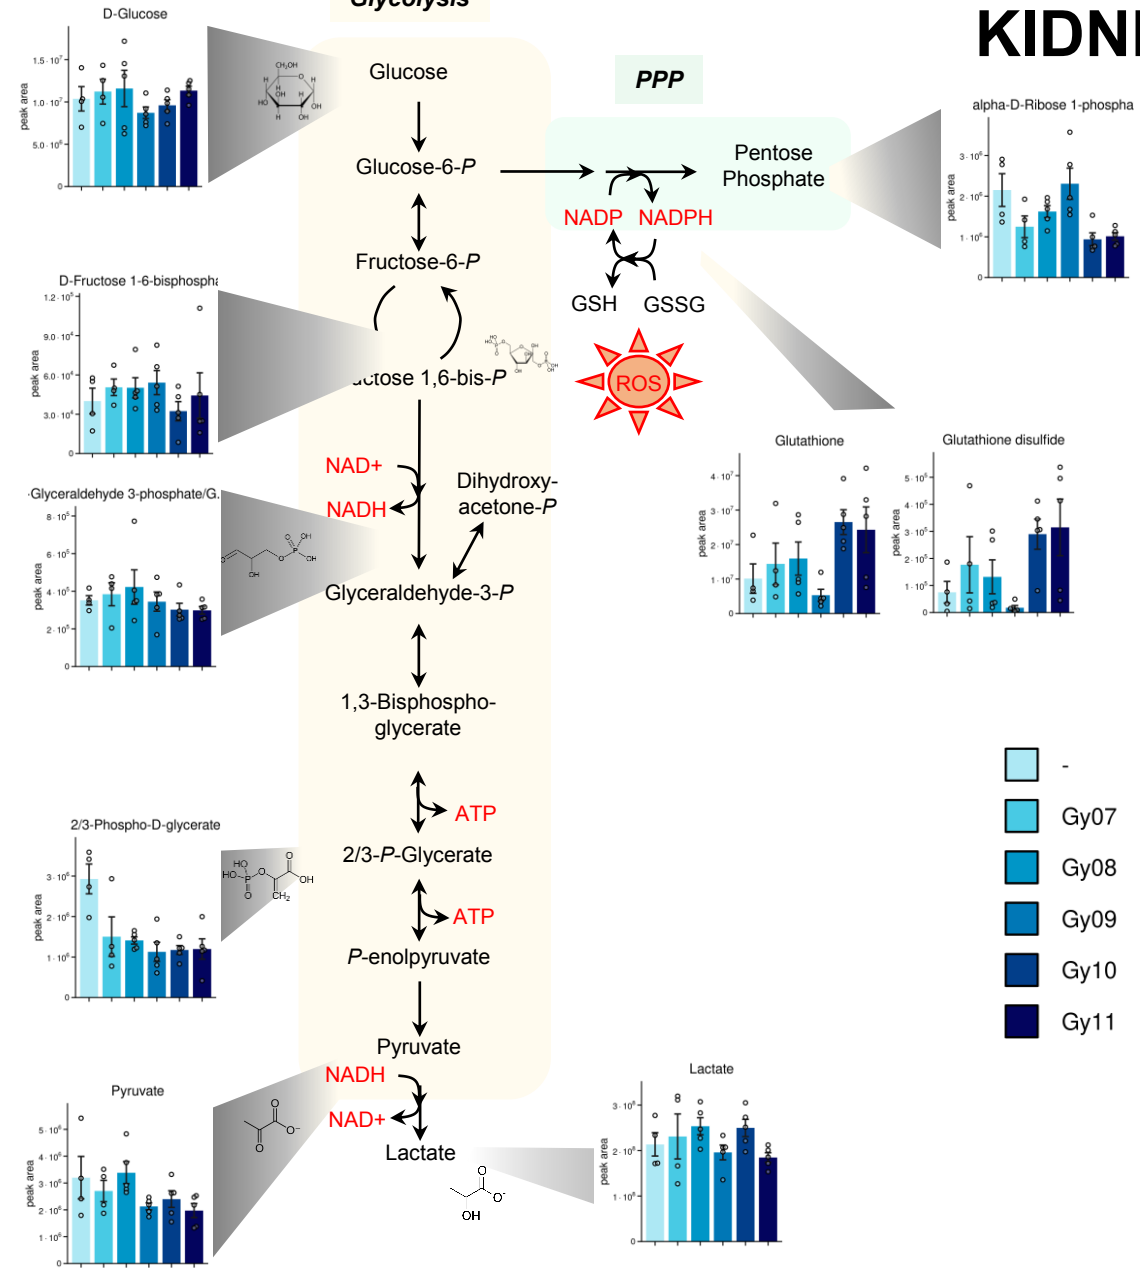

**KIDNEY**

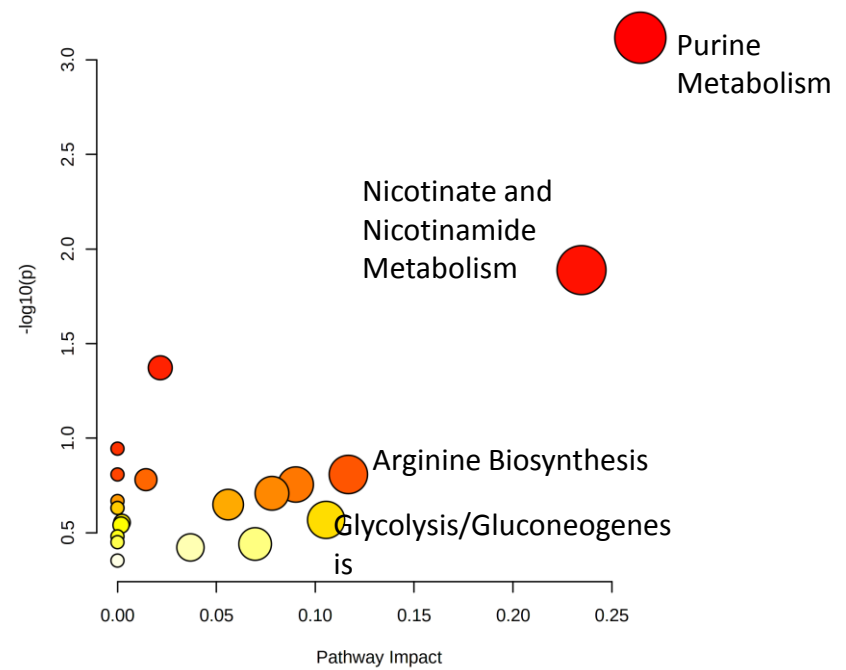

**Supp Fig 1.B** – Bar plots on the impact of radiation on the TCA cycle, glycolysis and pathway analysis of top metabolic effects in kidneys.

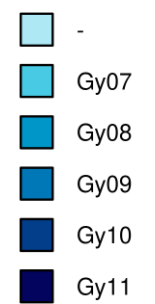

# KIDNEY

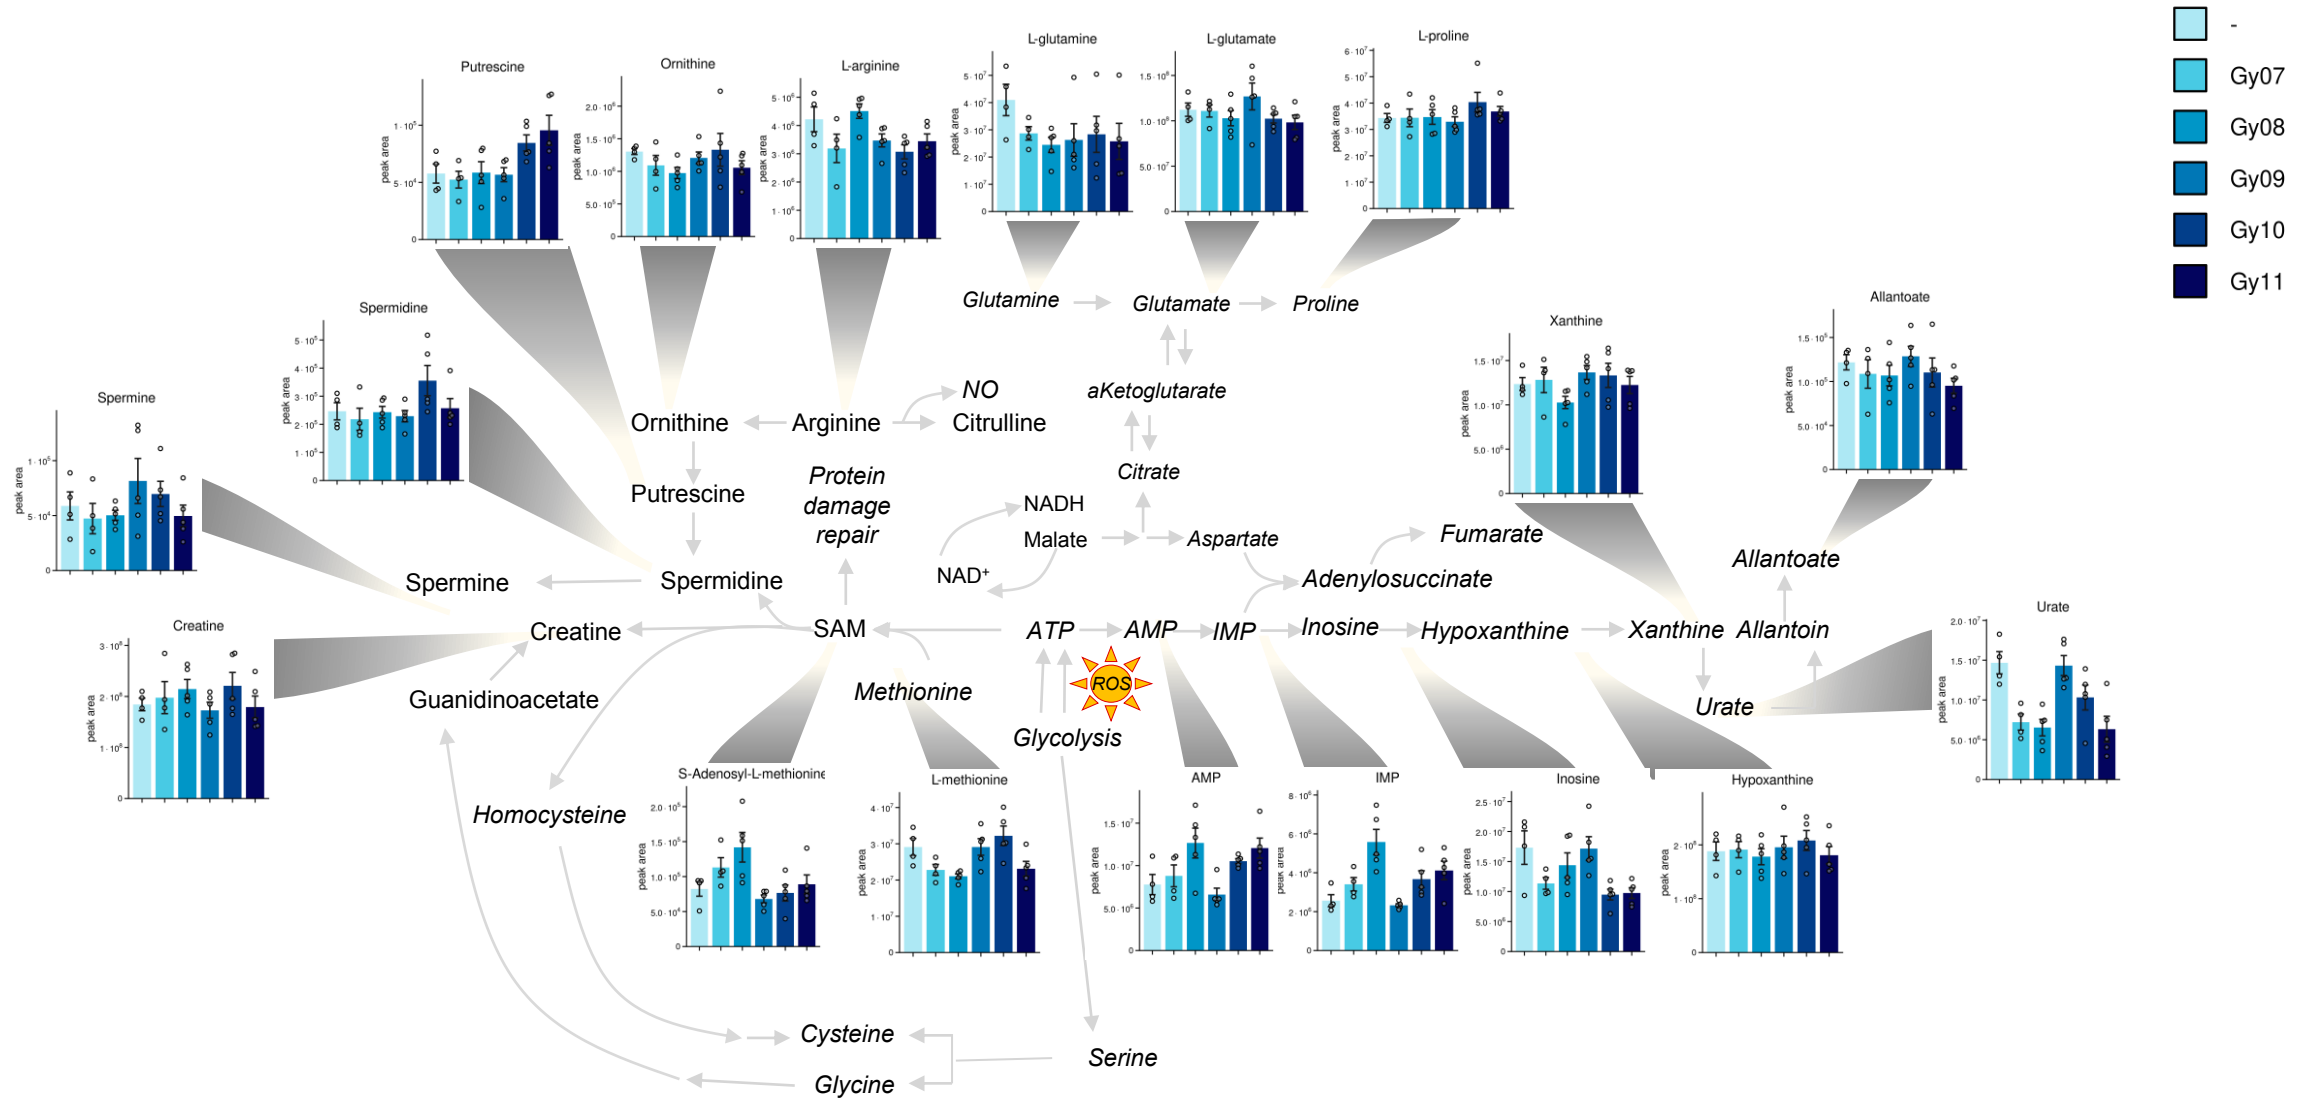

**Supp Fig 1.C** – Bar plots on the impact of radiation on protein damage and repair mechanisms in the kidneys.

# SPLEEN

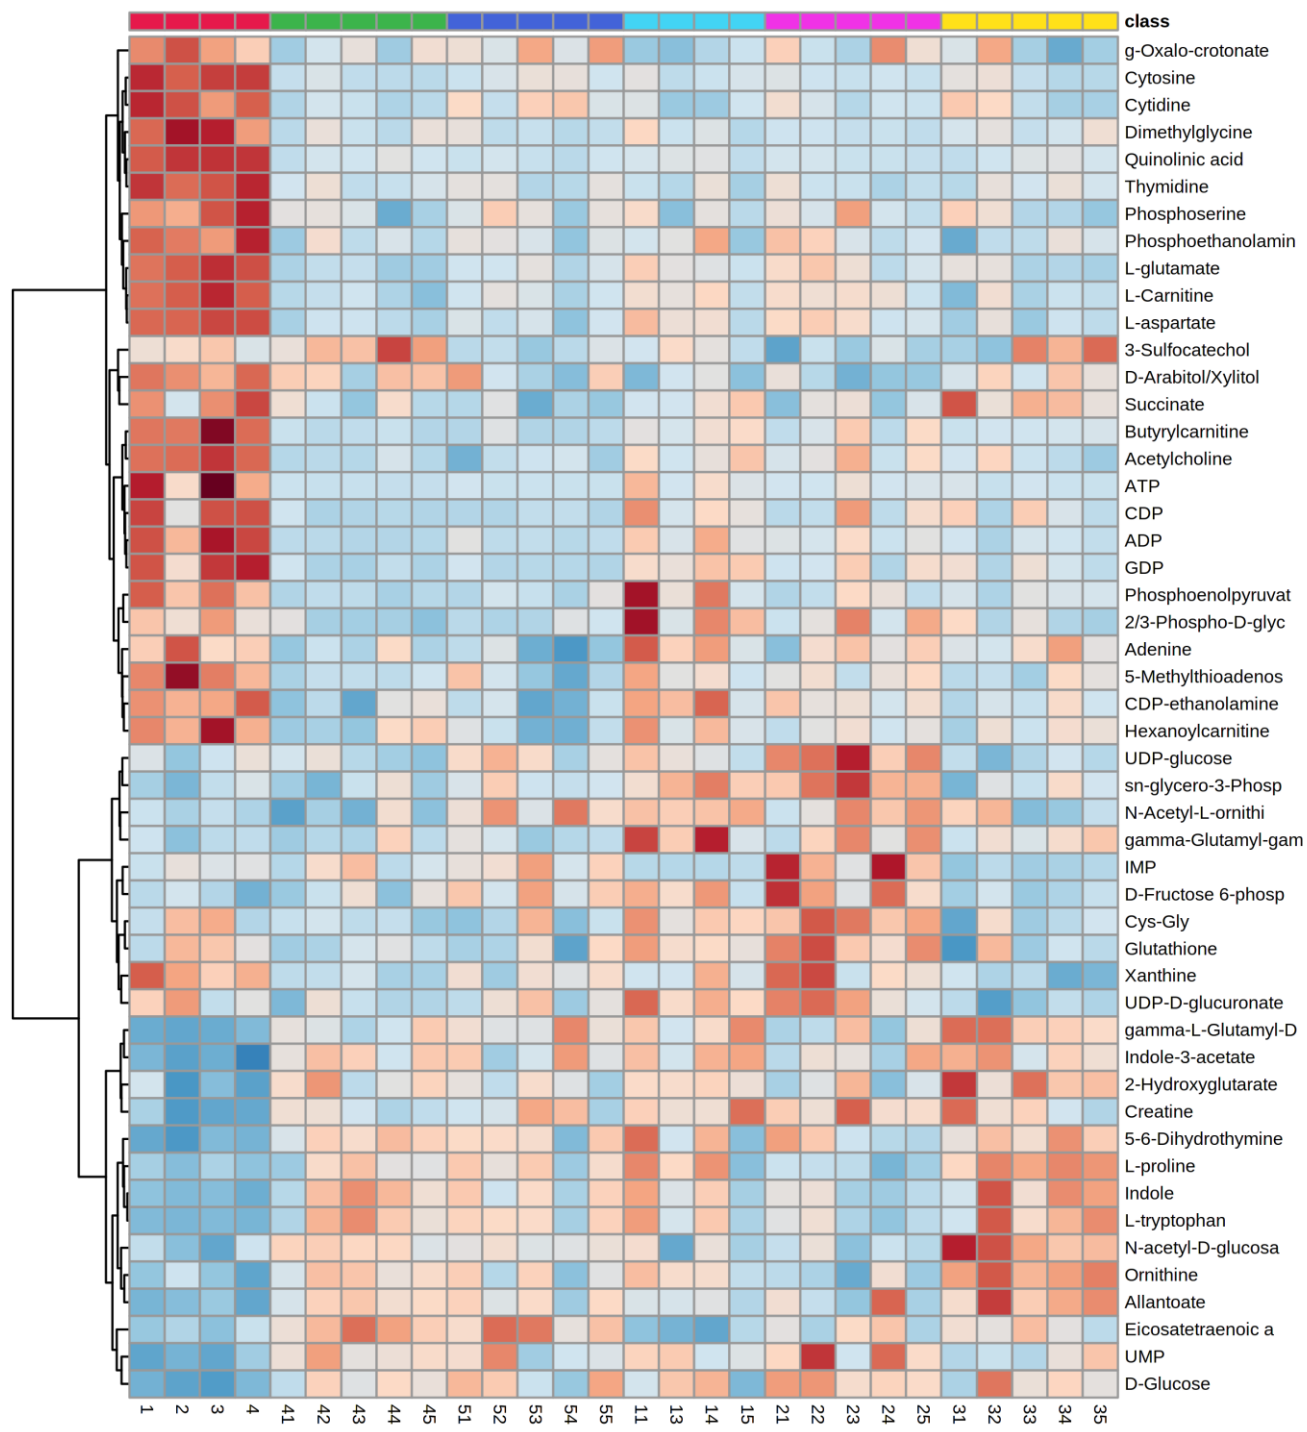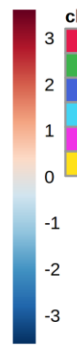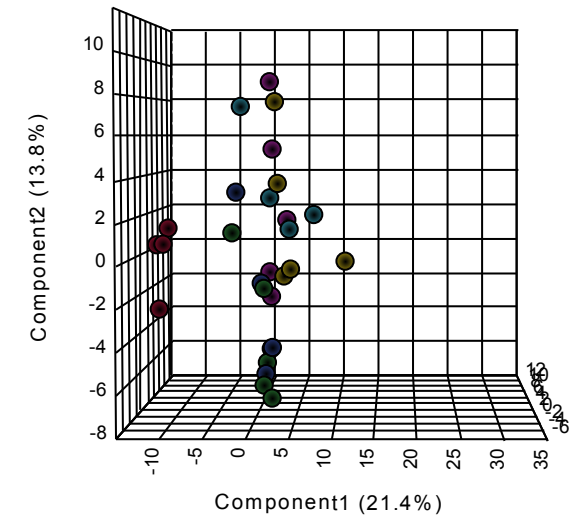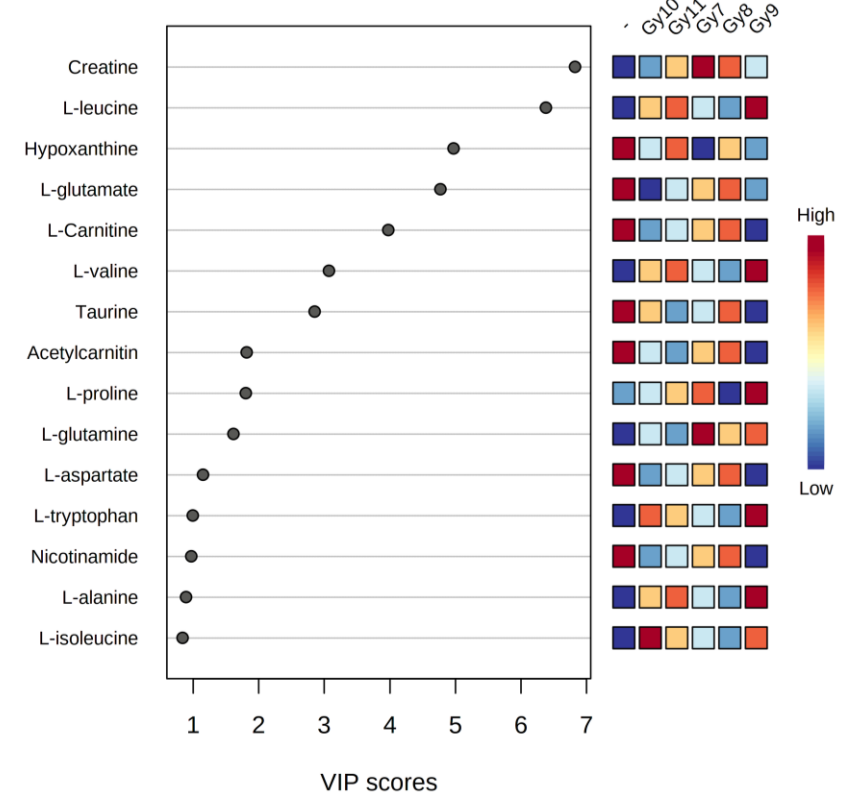

**Supp Fig 1.D** – Heat map (top 50 ANOVA), Principal Component Analysis and VIP Score plots for spleen metabolites in response to radiation.

**TCA**

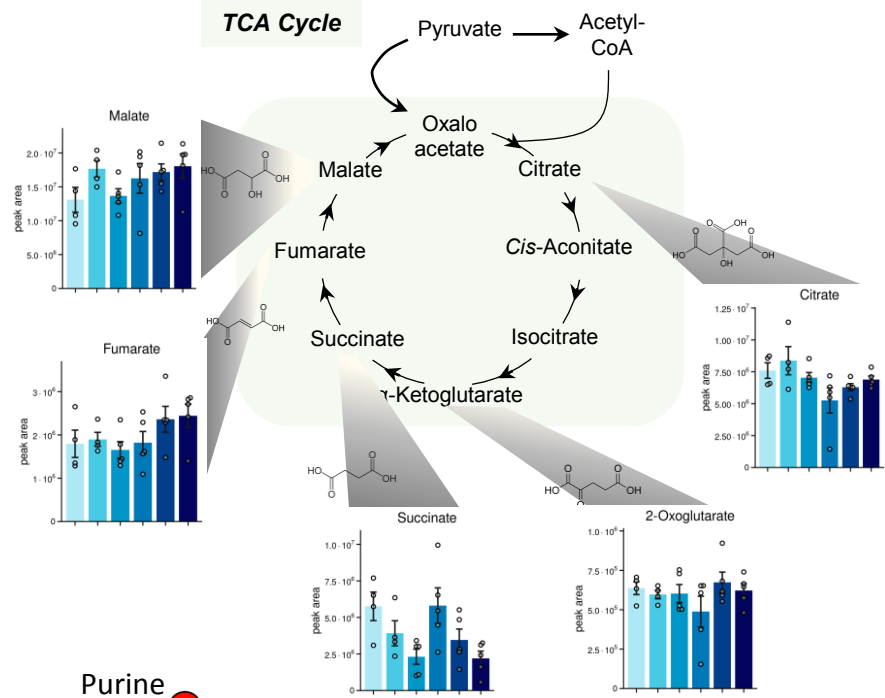

**SPLEEN**

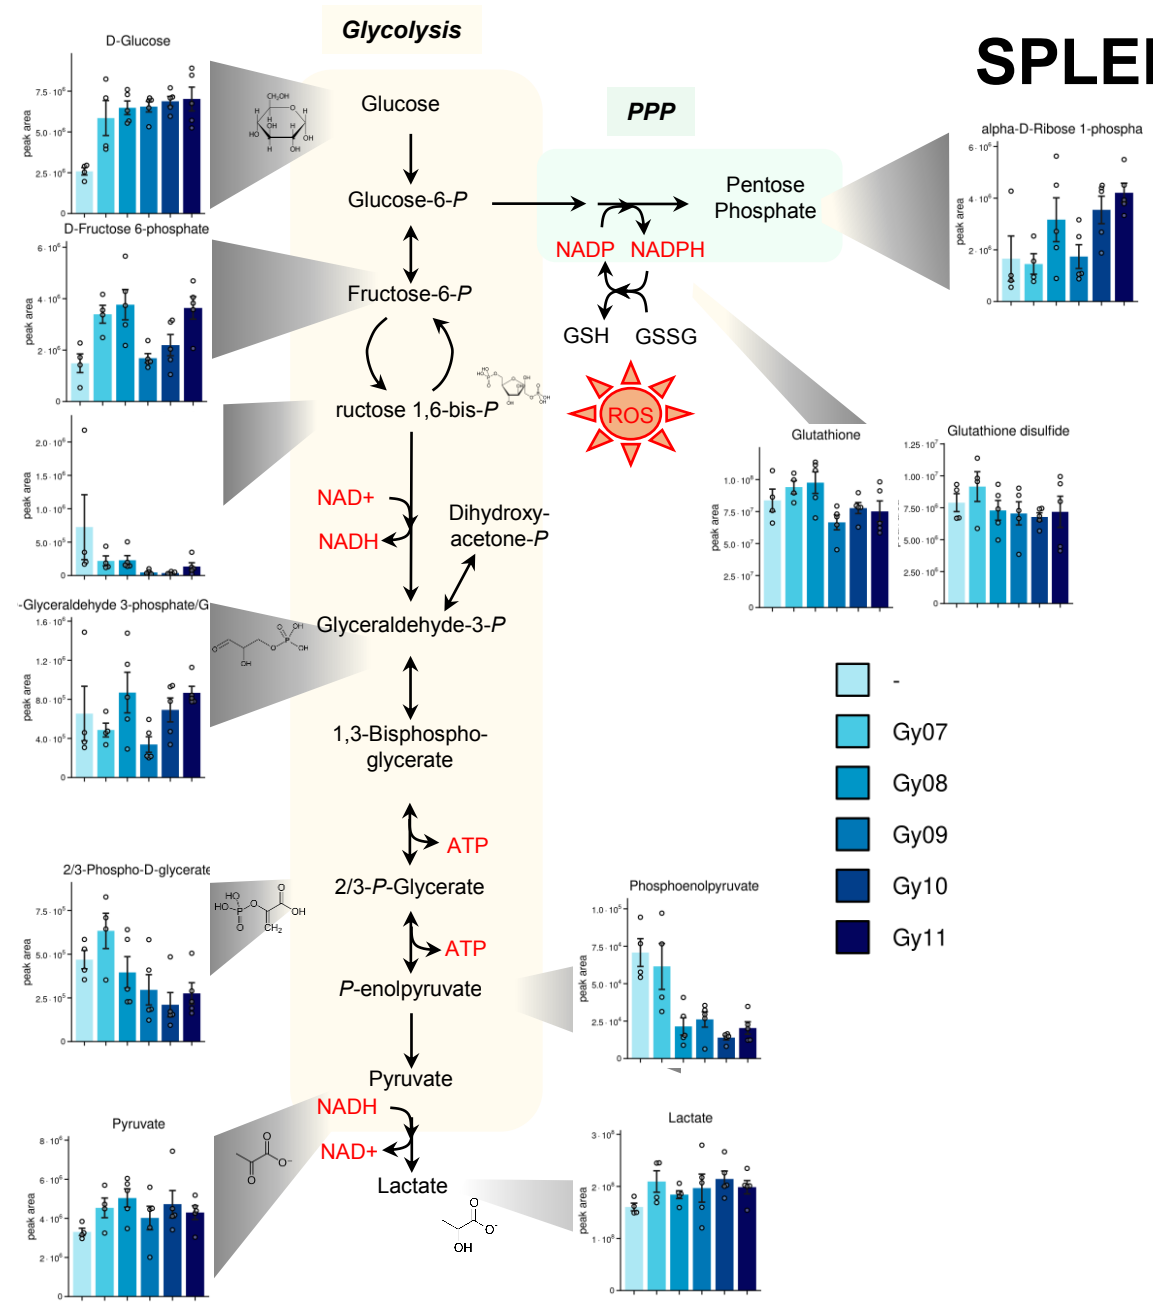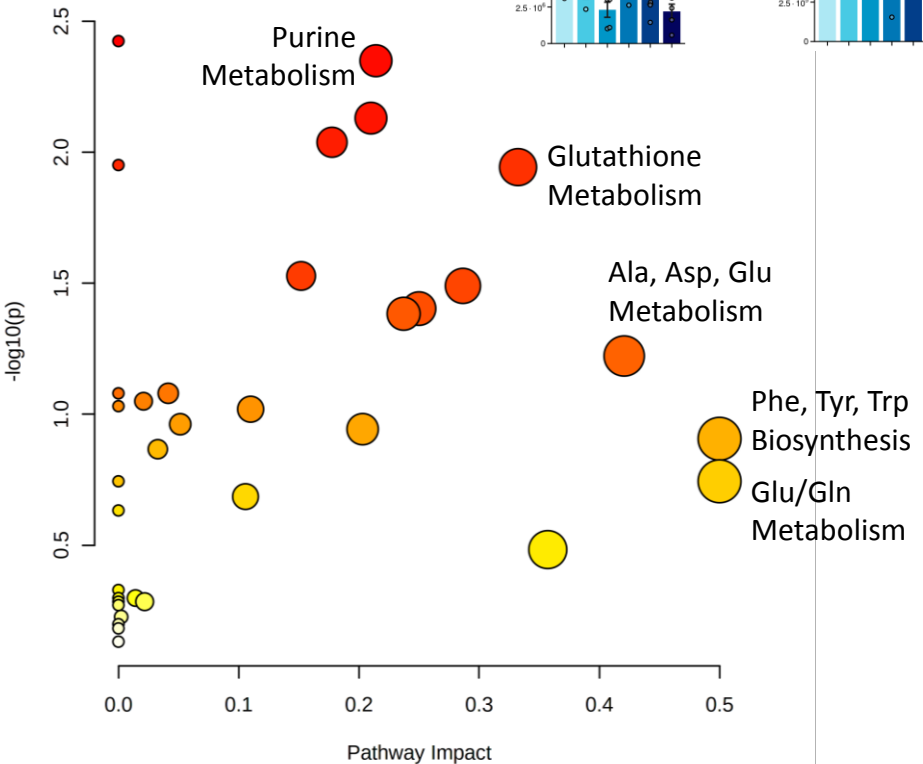

**Supp Fig 1.E** – Bar plots on the impact of radiation on the TCA cycle, glycolysis and pathway analysis of top metabolic effects in spleen.

# SPLEEN

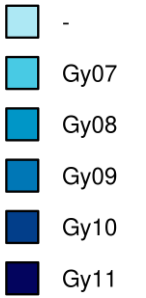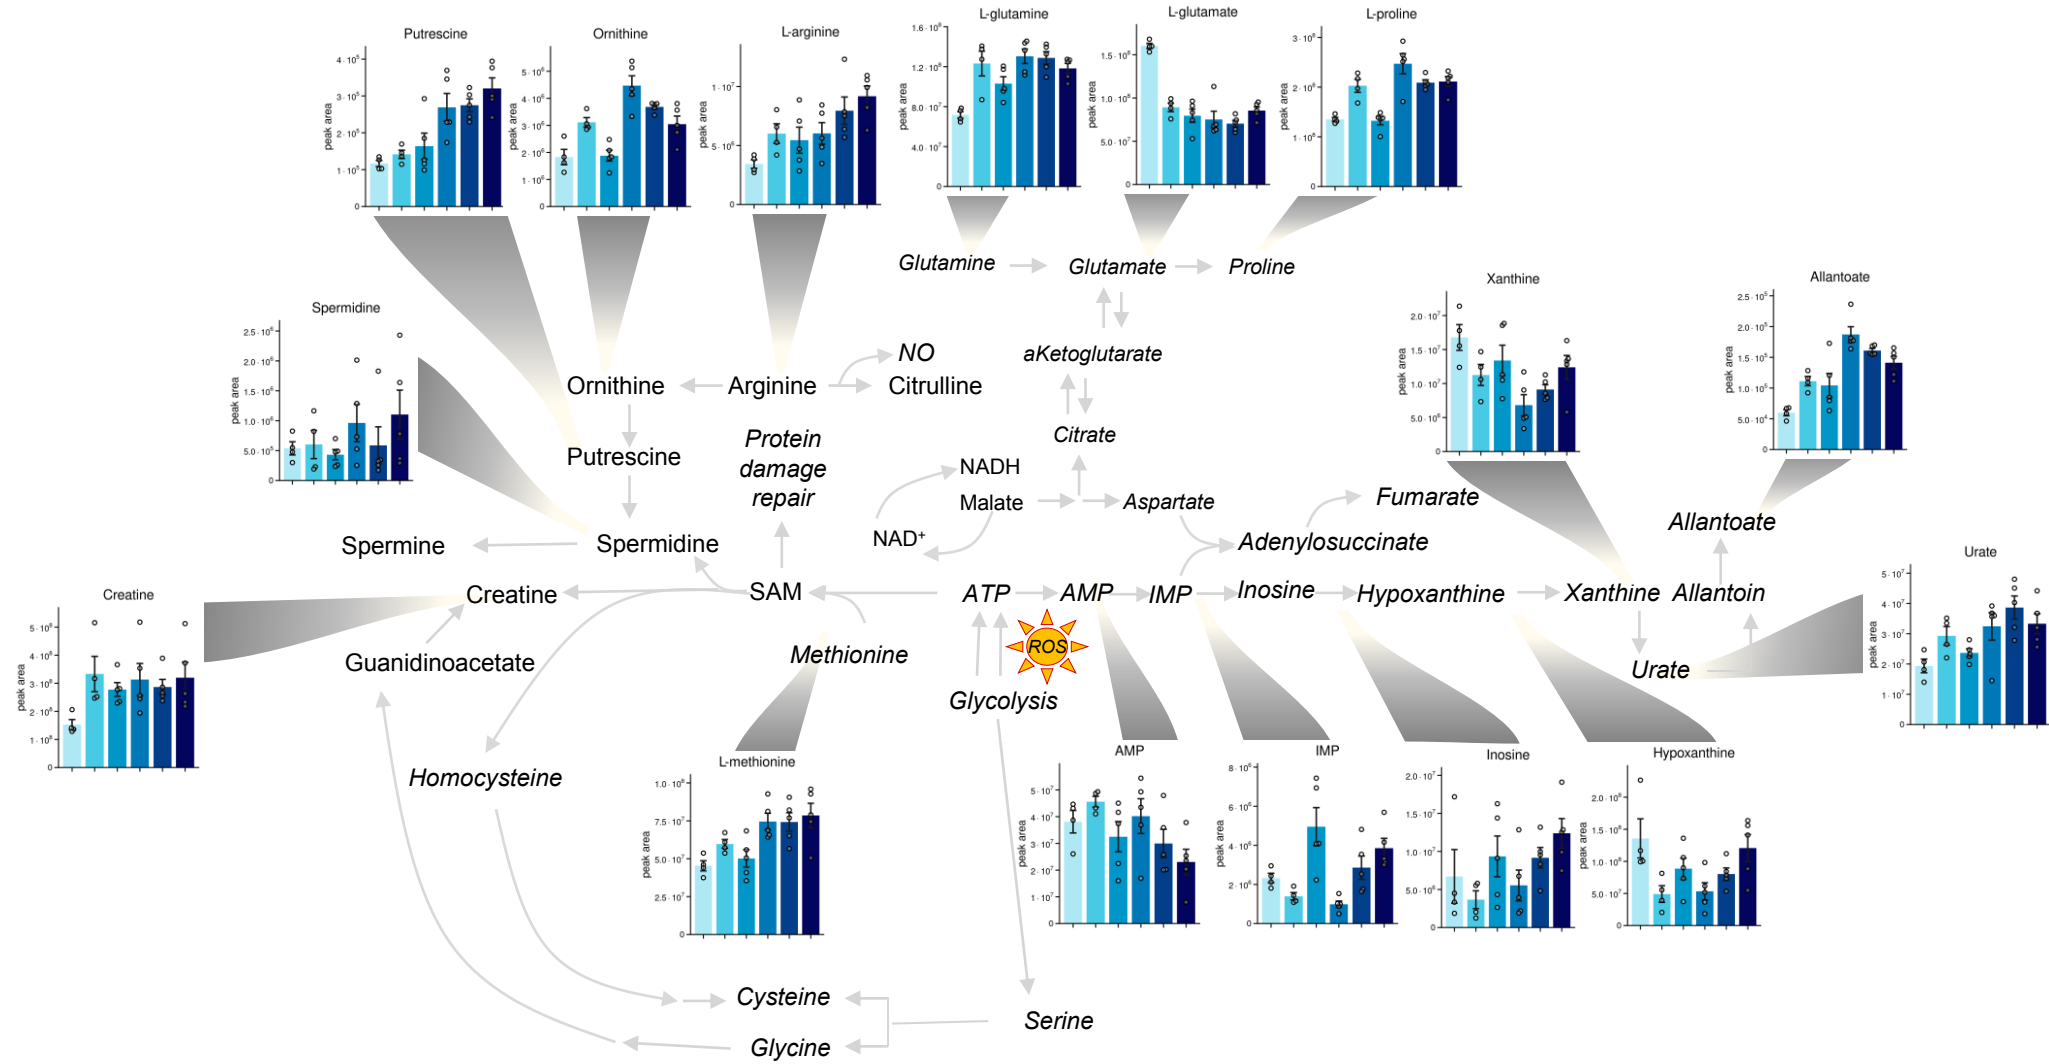

Supp Fig 1.F – Bar plots on the impact of radiation on protein damage and repair mechanisms in the spleen.

# RBC

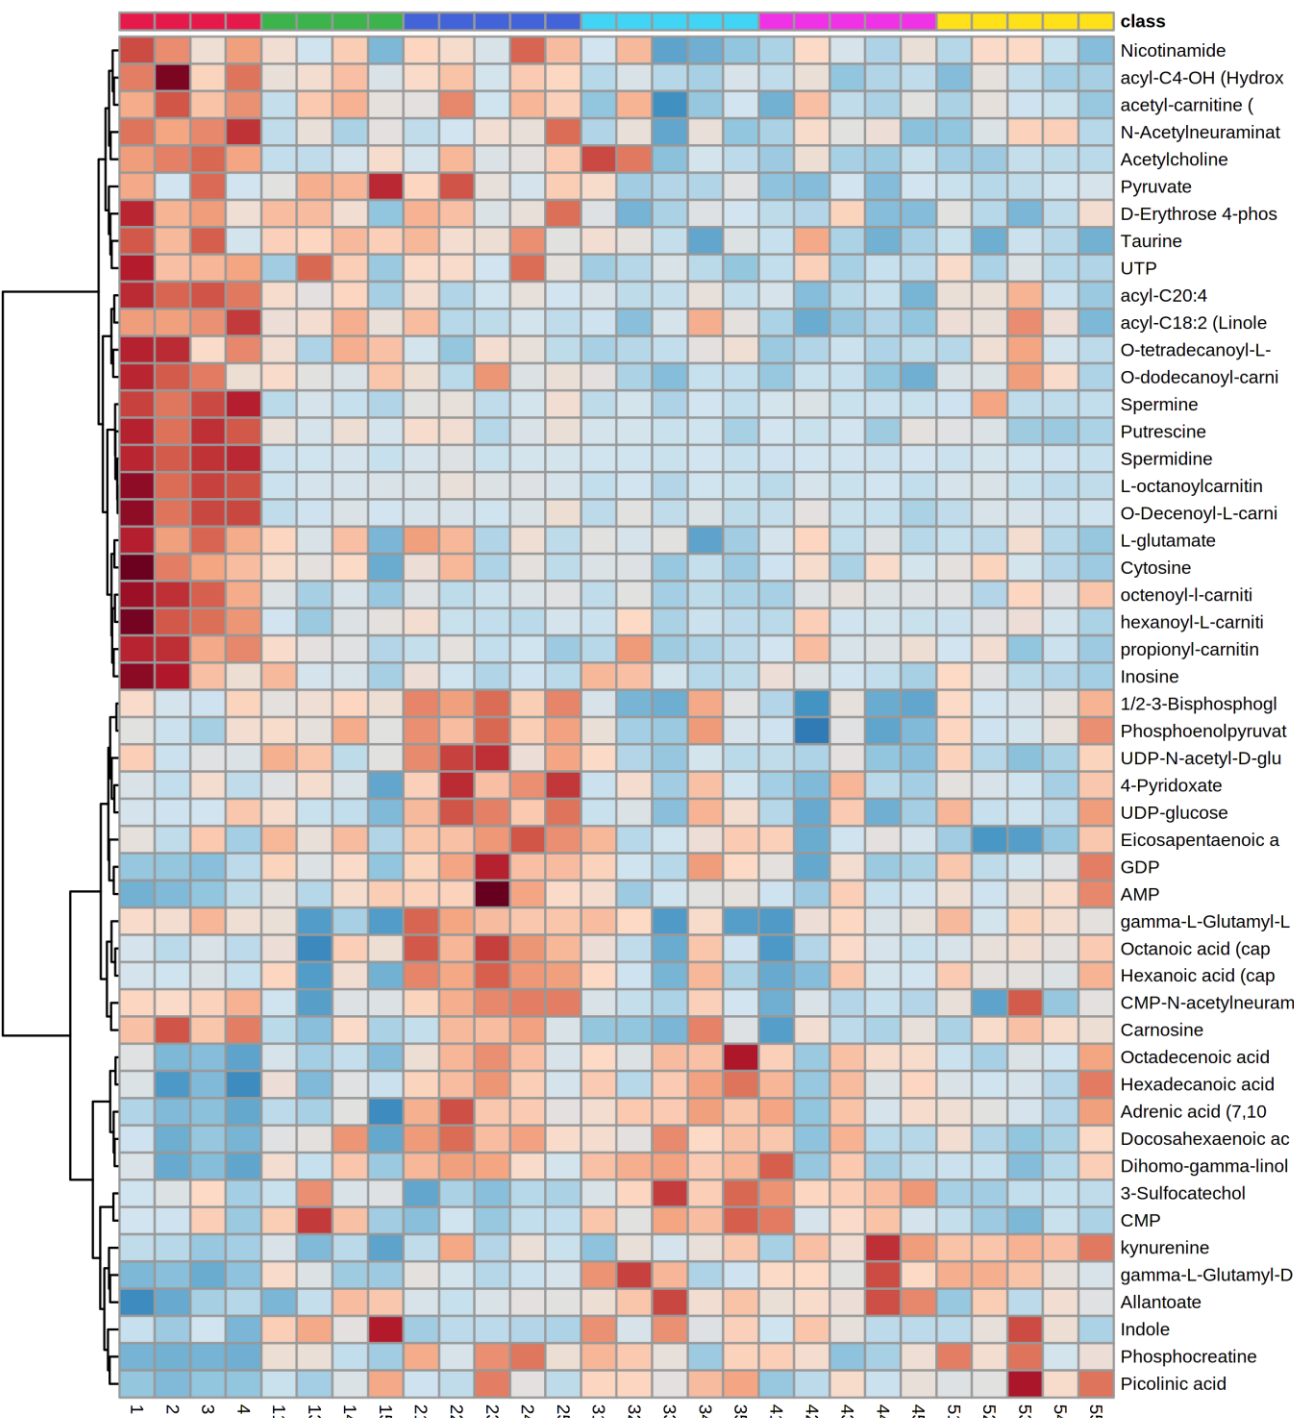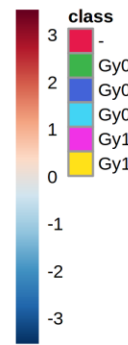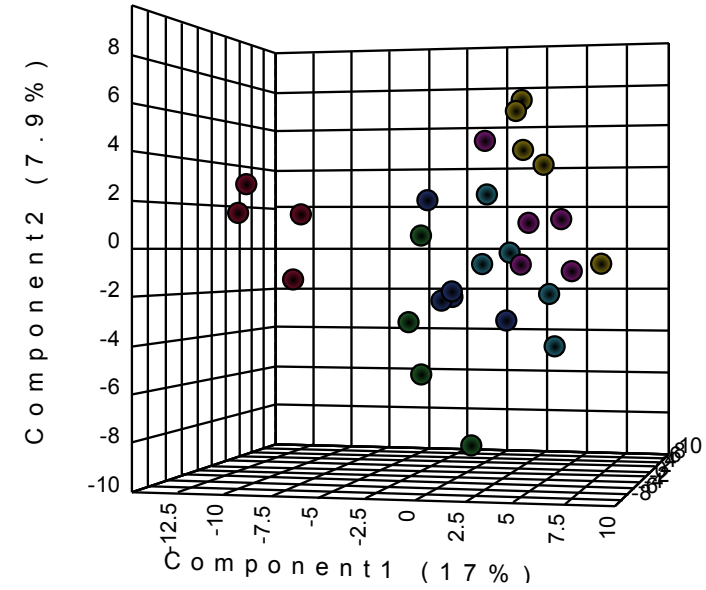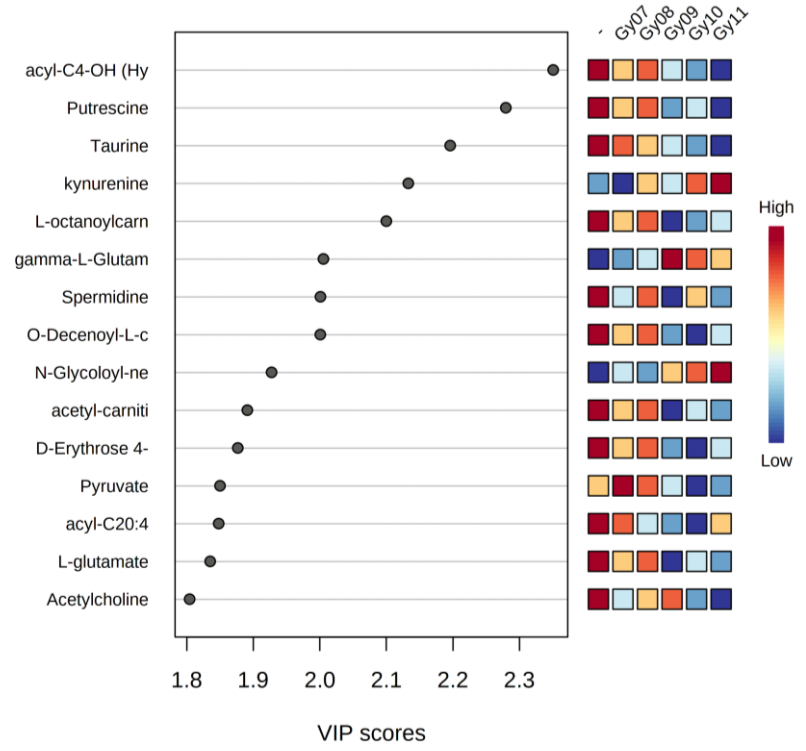

**Supp Fig 1.G** – Heat map (top 50 ANOVA), Principal Component Analysis and VIP Score plots for RBC metabolites in response to radiation.



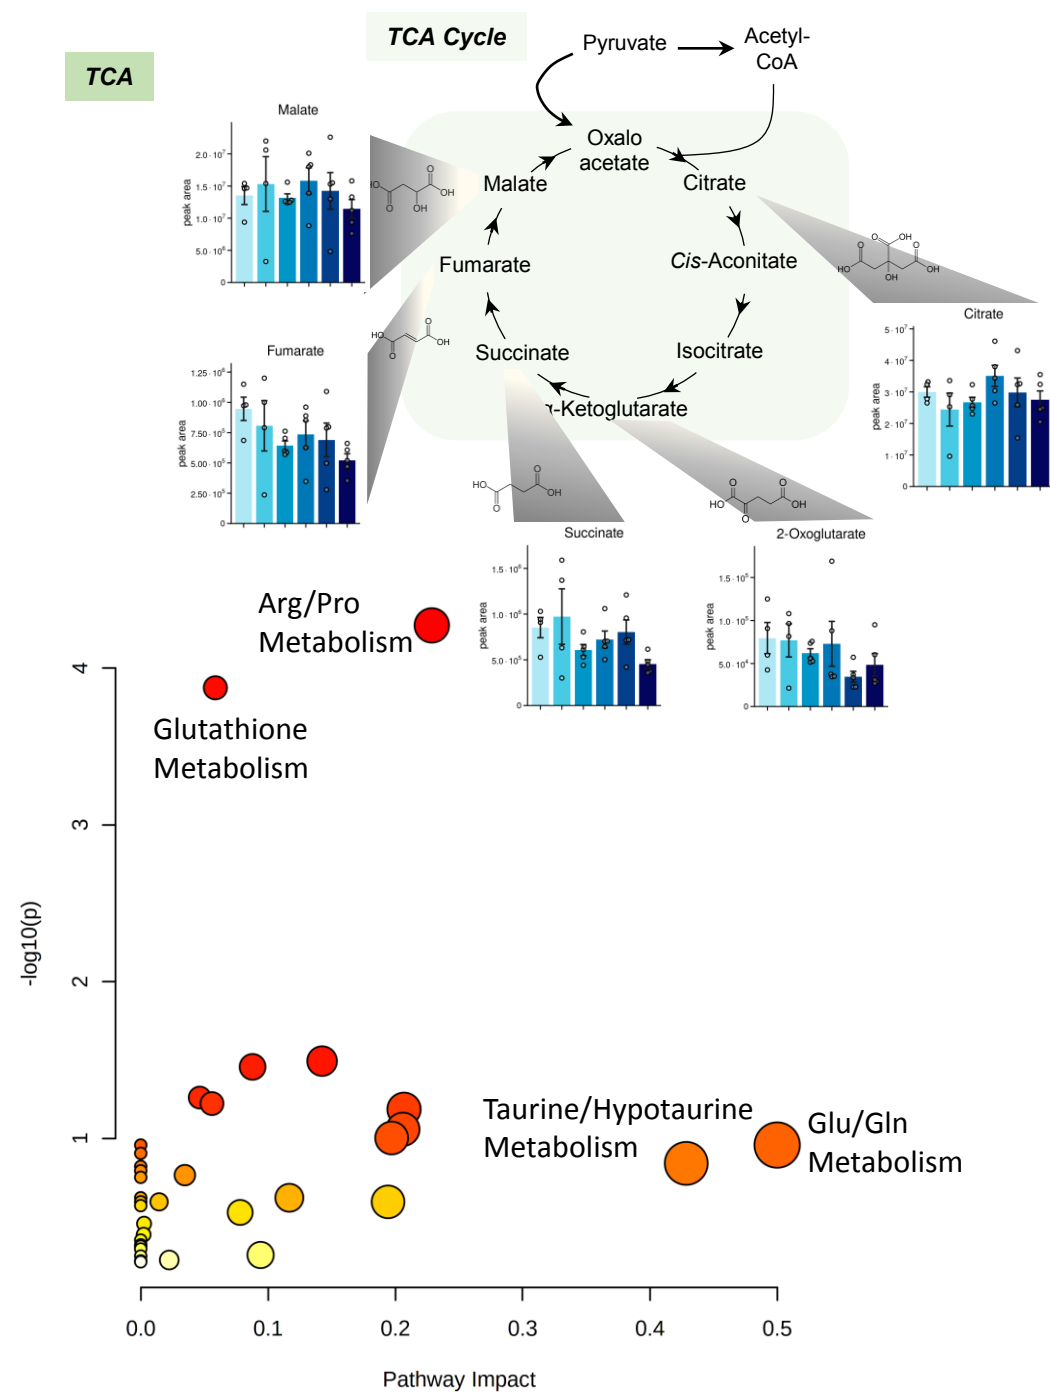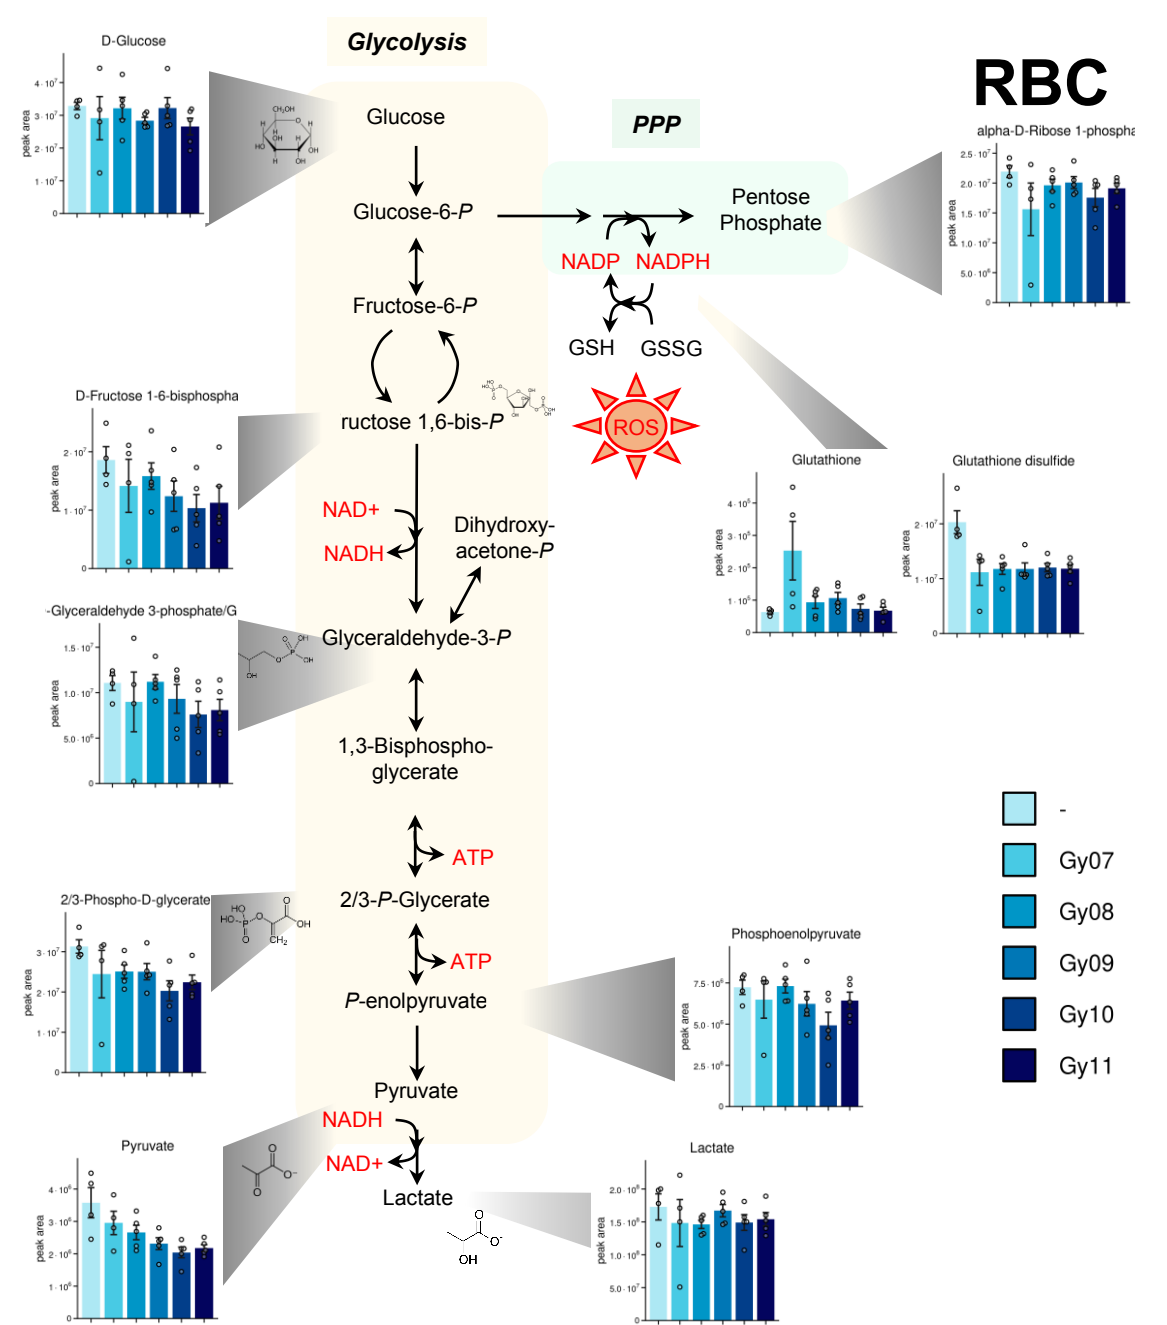

**Supp Fig 1.H** – Bar plots on the impact of radiation on the TCA cycle, glycolysis and pathway analysis of top metabolic effects in RBC.

# RBC

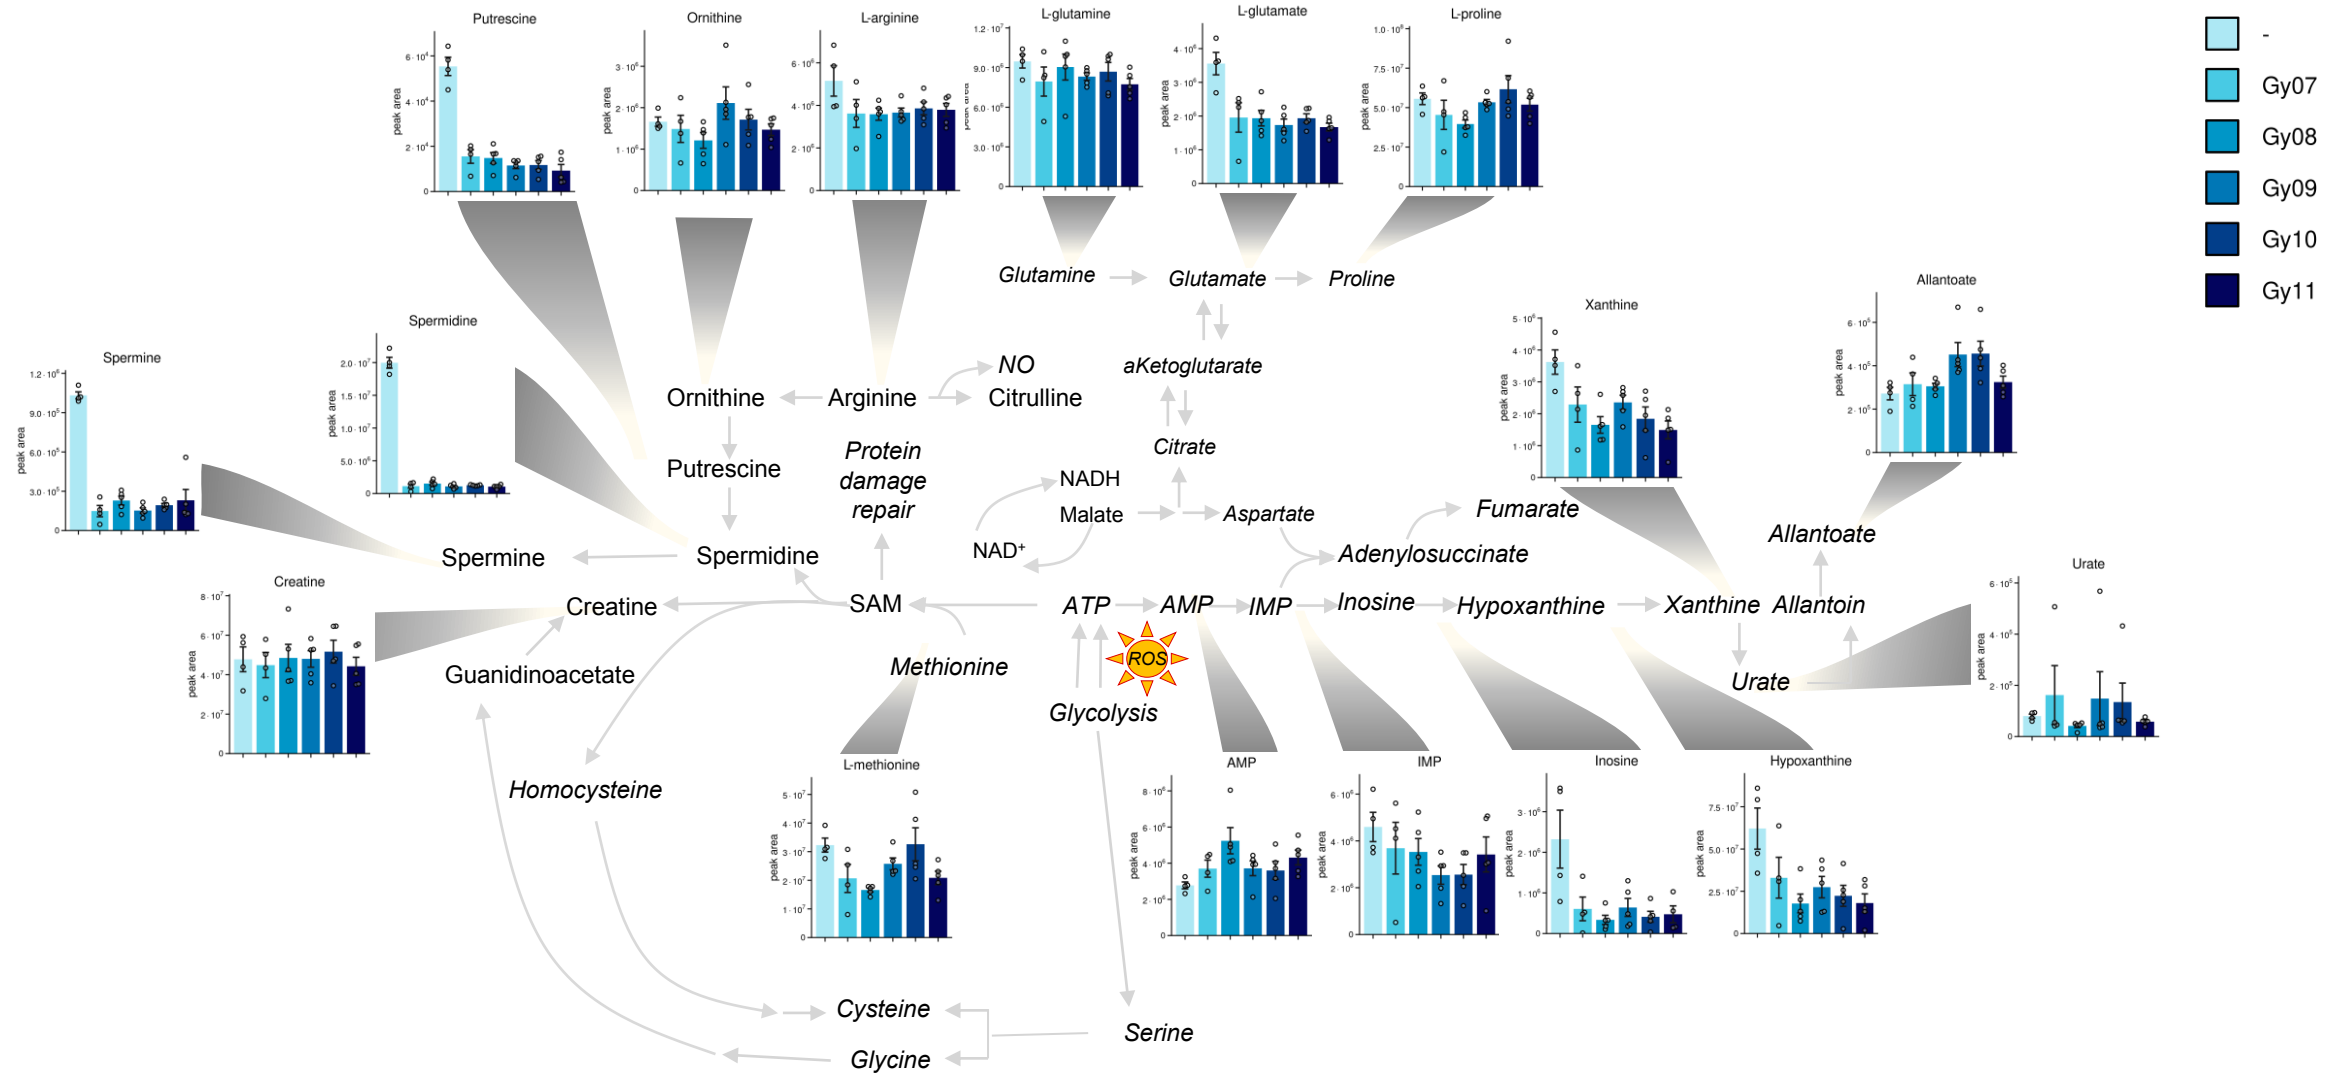

**Supp Fig 1.I** – Bar plots on the impact of radiation on protein damage and repair pathways in RBC.

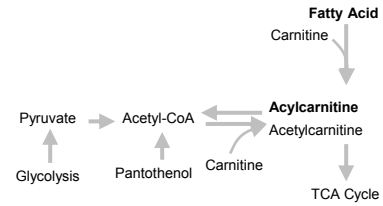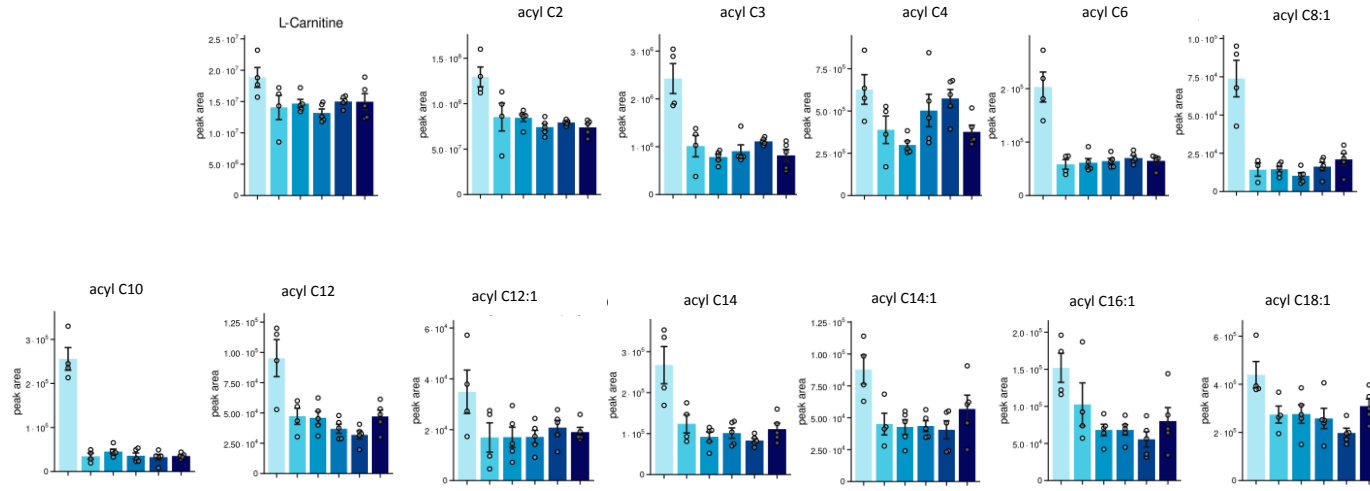

Acylcarnitines

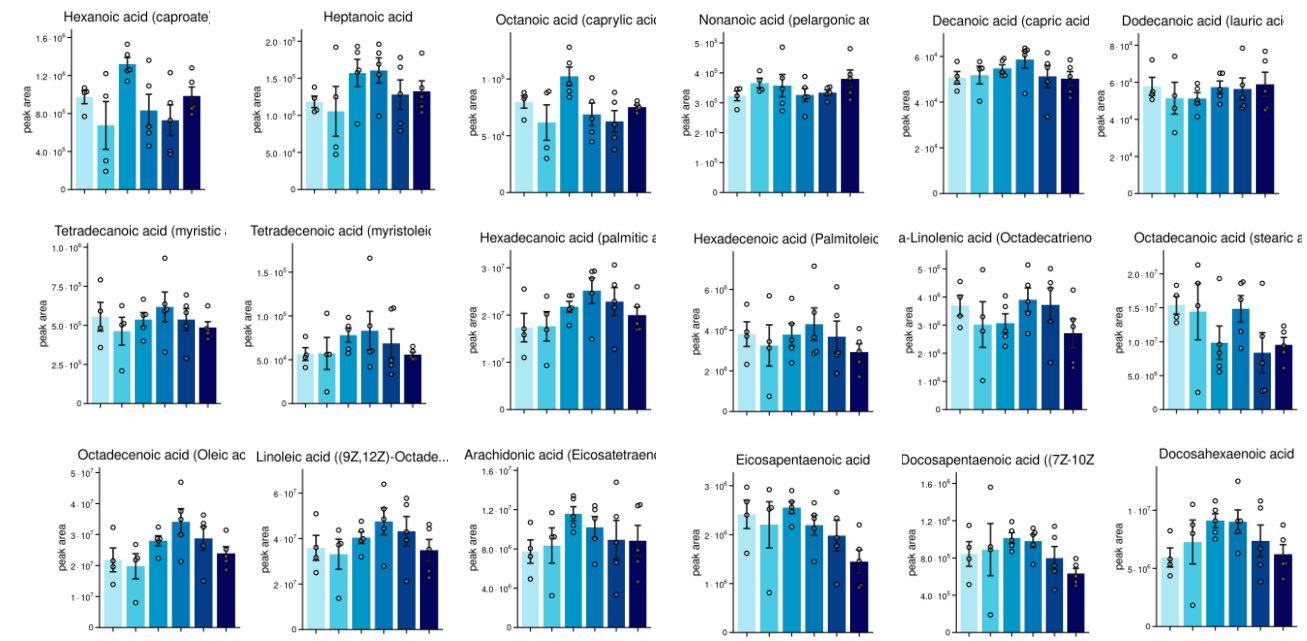

Fatty Acids

Supp Fig 1.J – Bar plots showing the impact of radiation on acyl-carnitines and fatty acids in RBC.

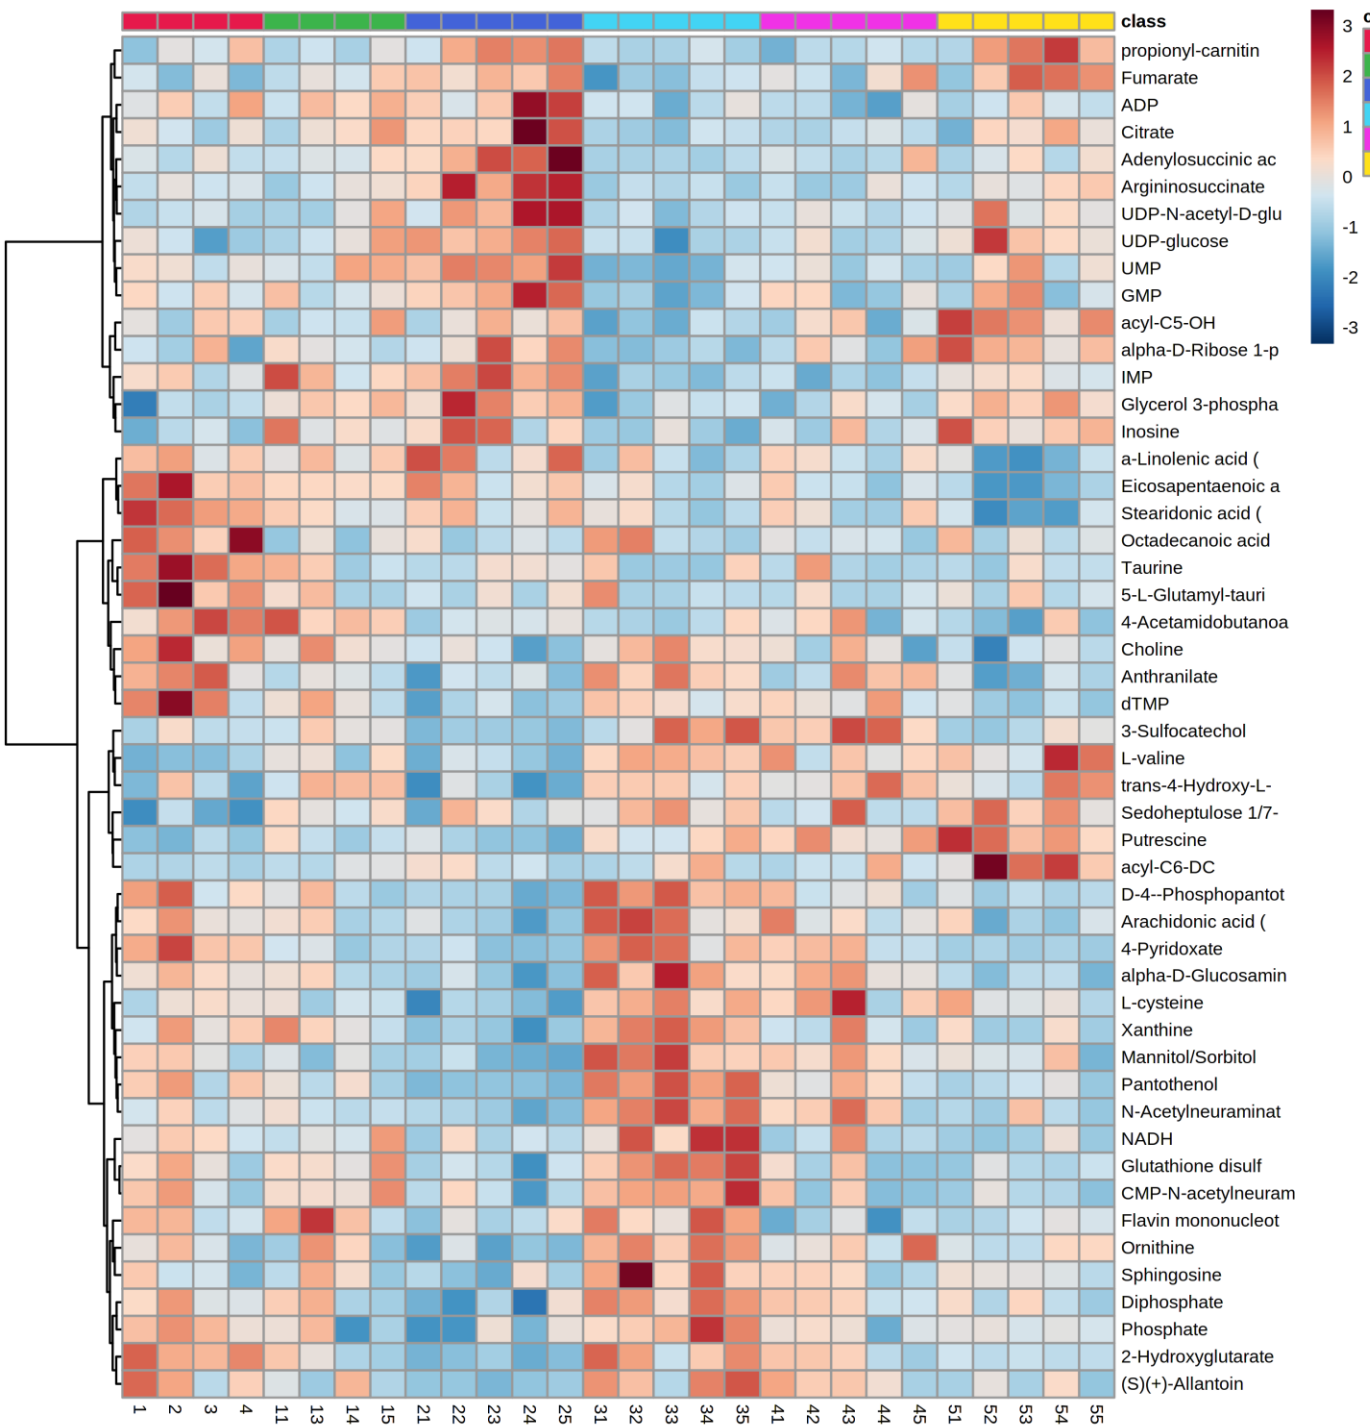

# LIVER

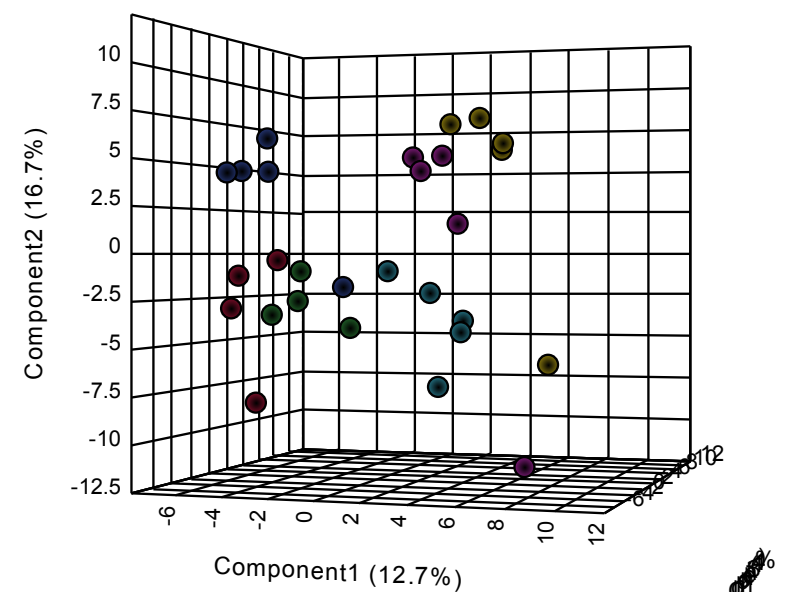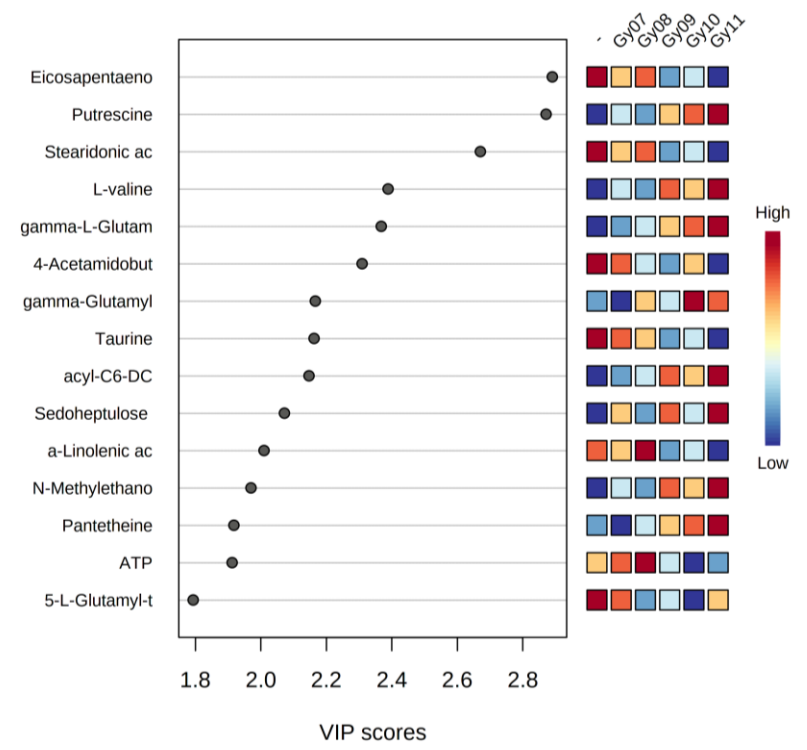

**Supp Fig 1.K** – Heat map (top 50 ANOVA), Principal Component Analysis and VIP Score plots for liver metabolites in response to radiation.

**TCA**

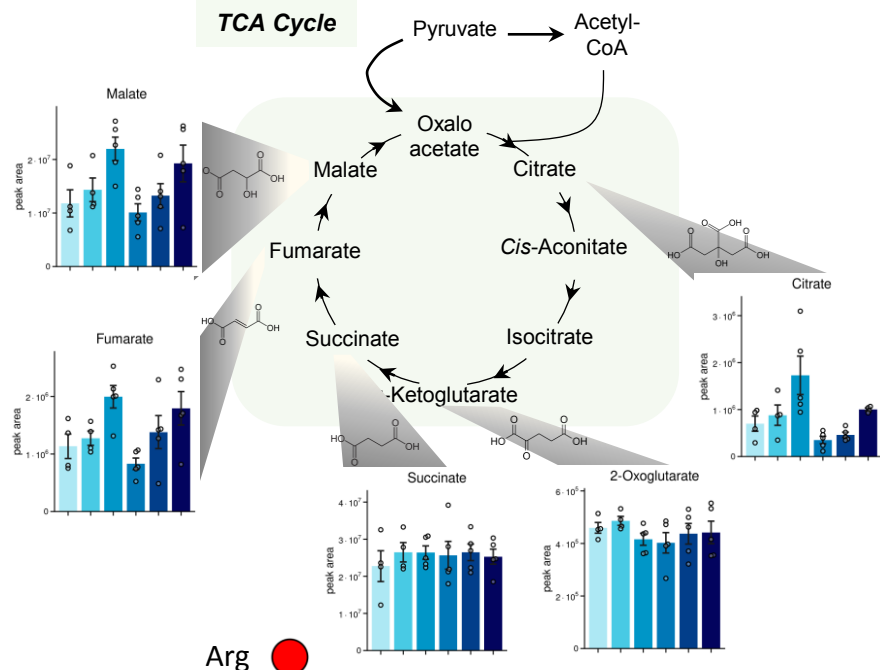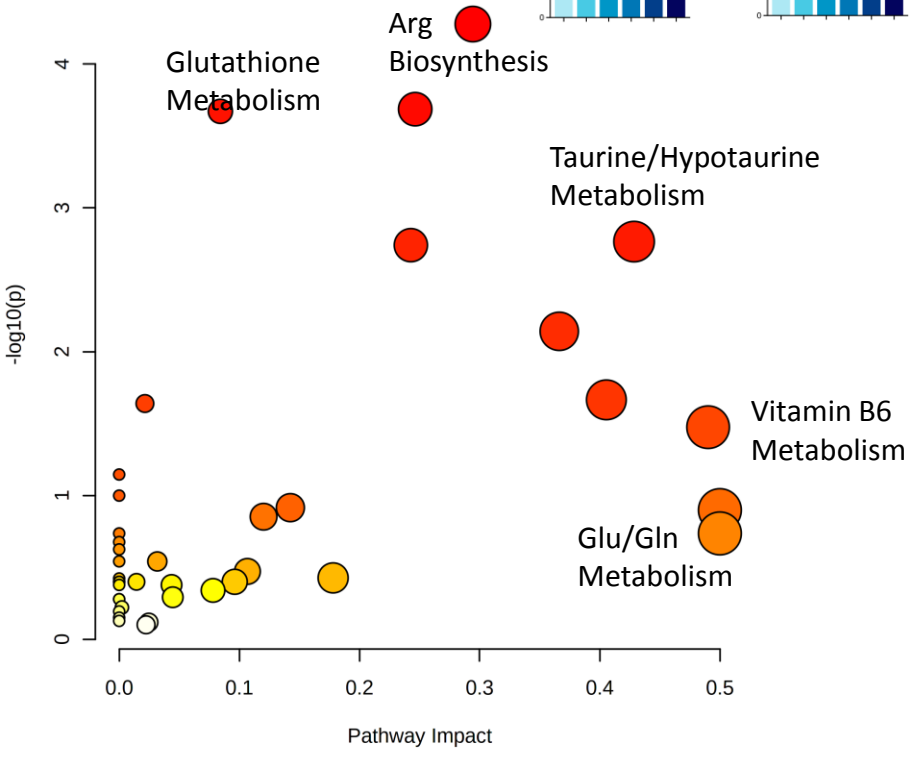

**LIVER**

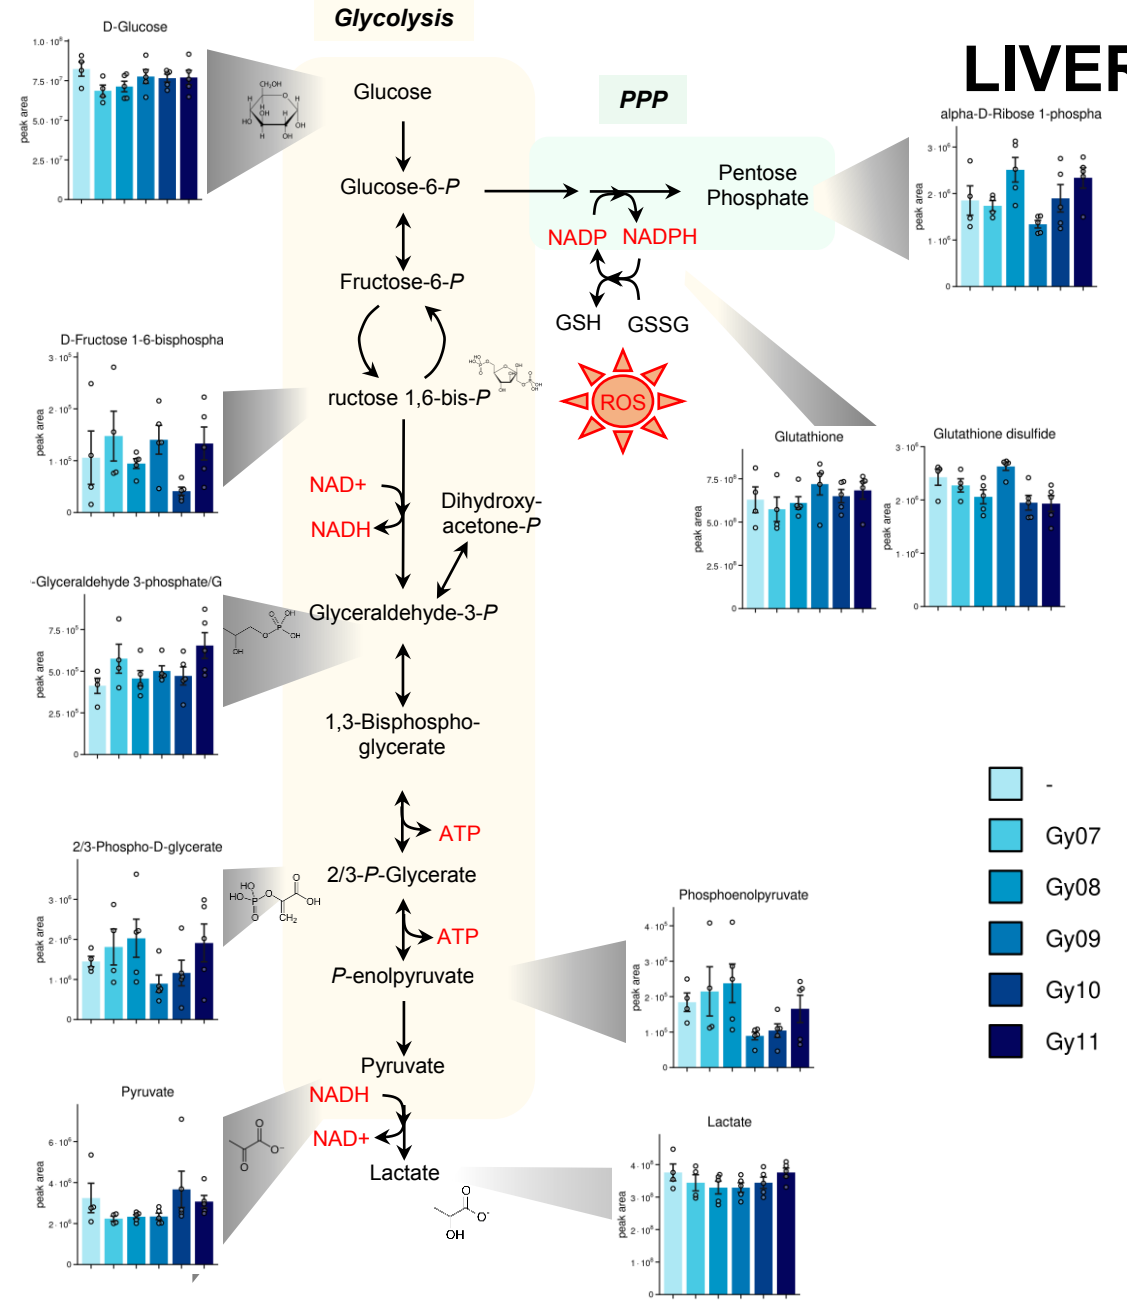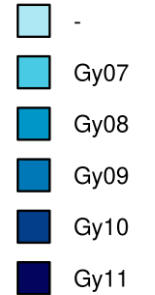

**Supp Fig 1.L** – Bar plots on the impact of radiation on the TCA cycle, glycolysis and pathway analysis of top metabolic effects in the liver.

# LIVER

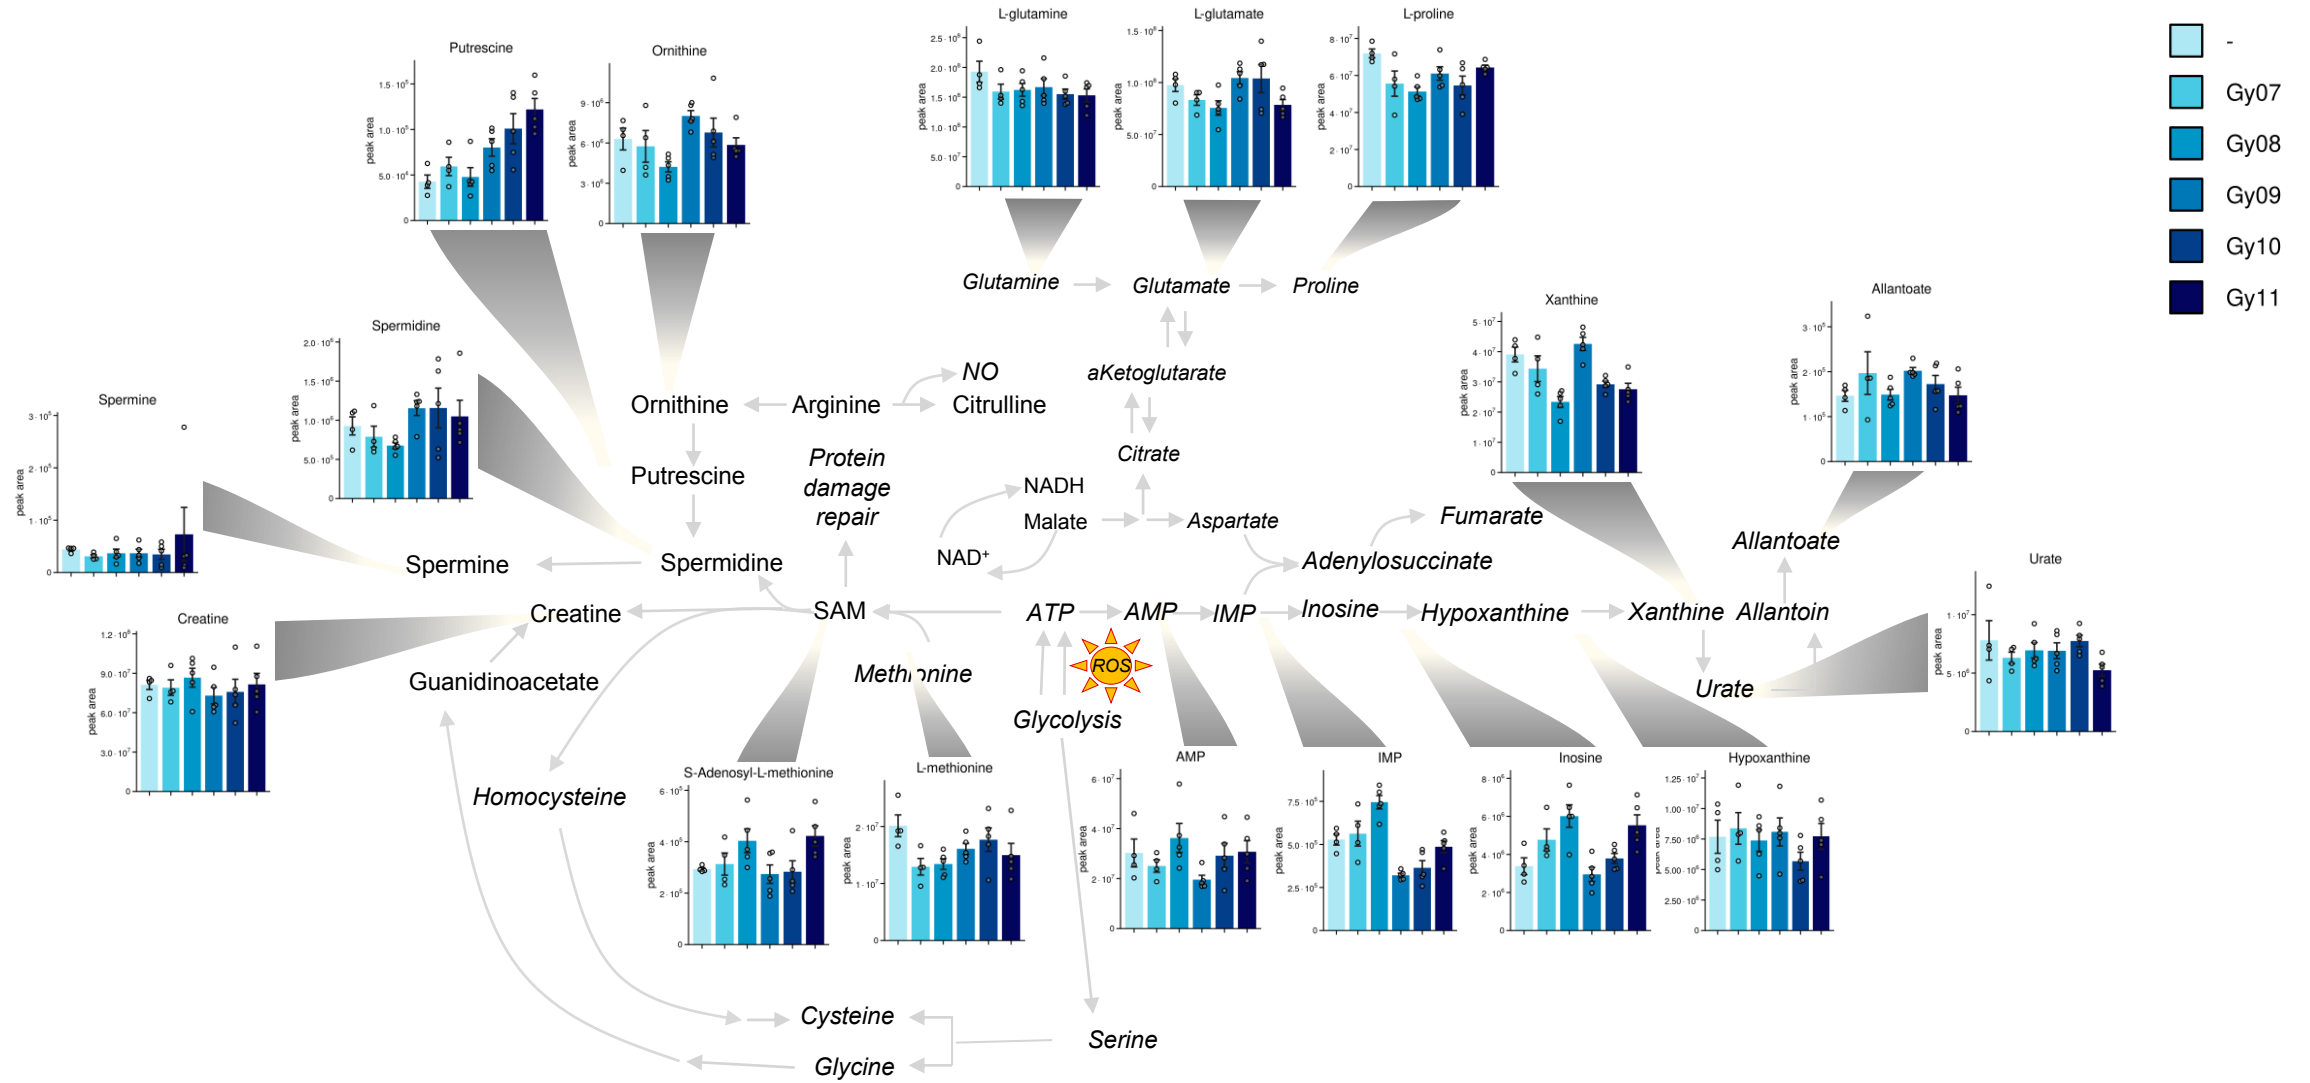

**Supp Fig 1.M** – Bar plots on the impact of radiation on protein damage and repair pathways in the liver.

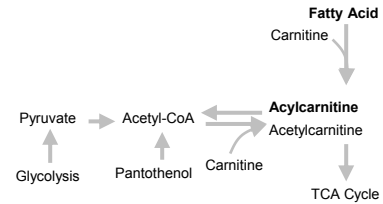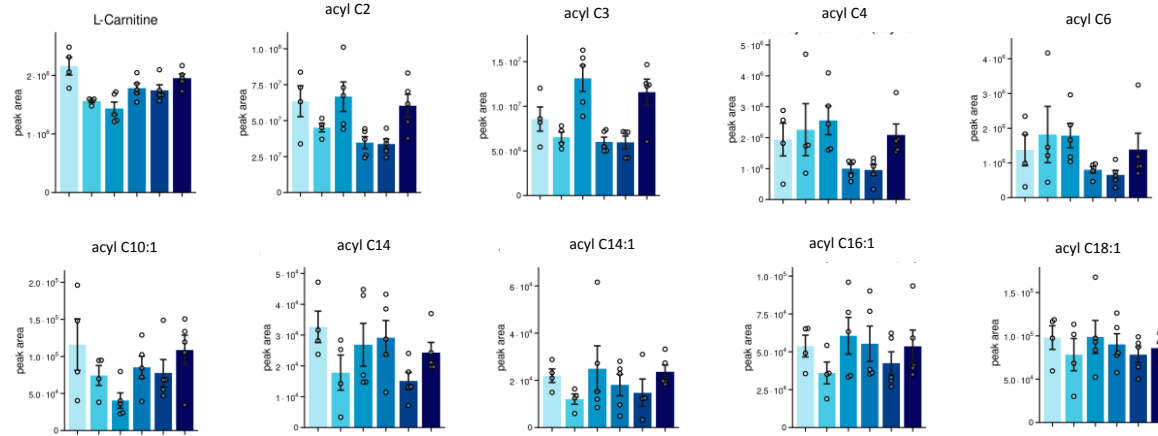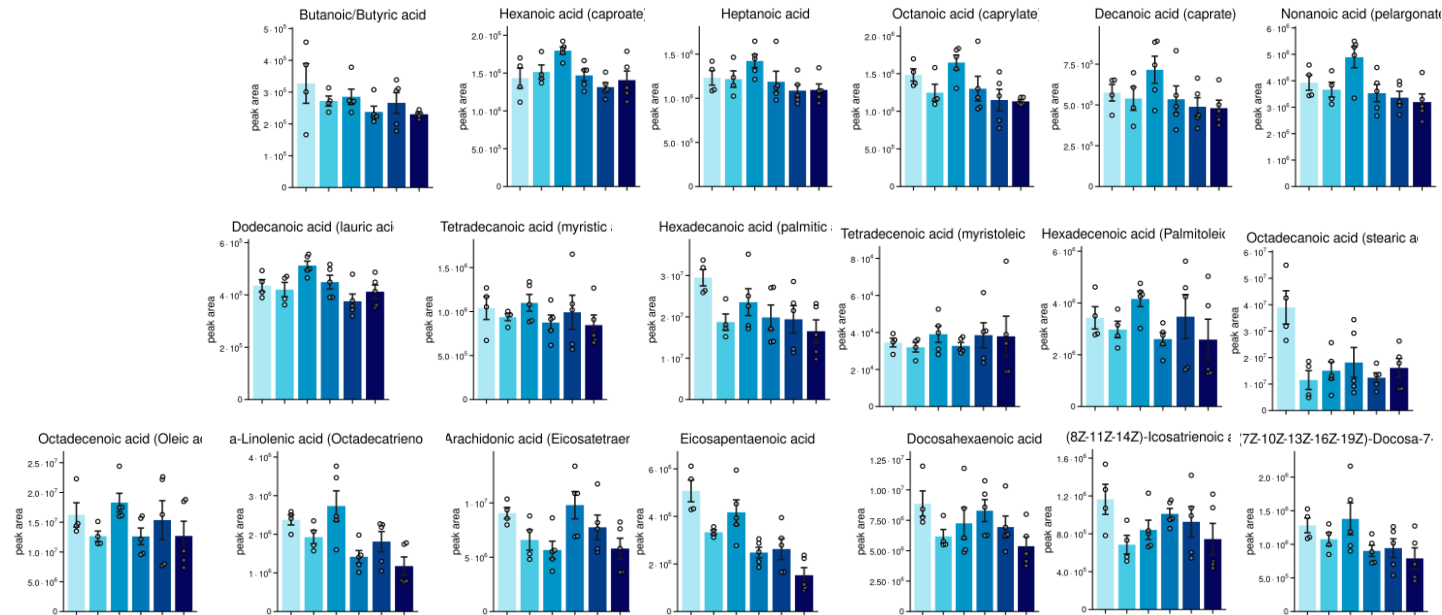

Acylcarnitines

Fatty Acids

Supp Fig 1.N – Bar plots showing the impact of radiation on acyl-carnitines and fatty acids in the liver.

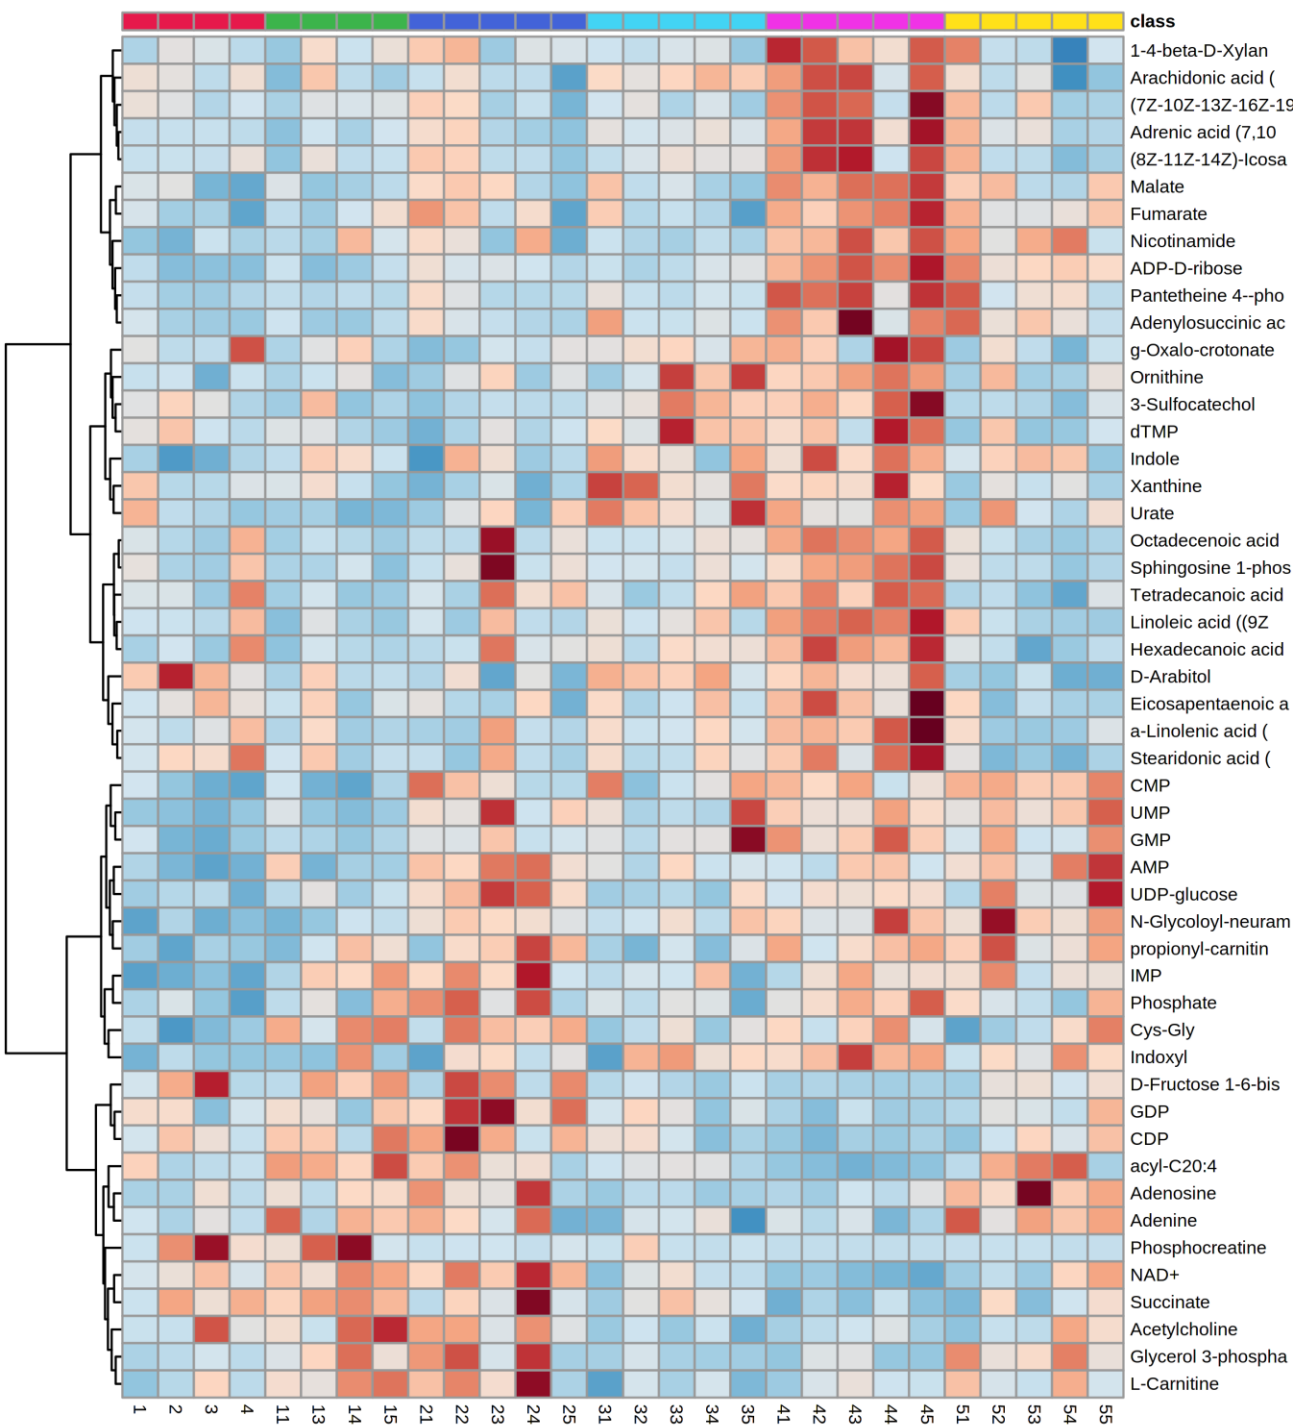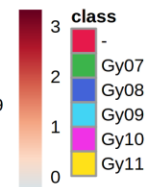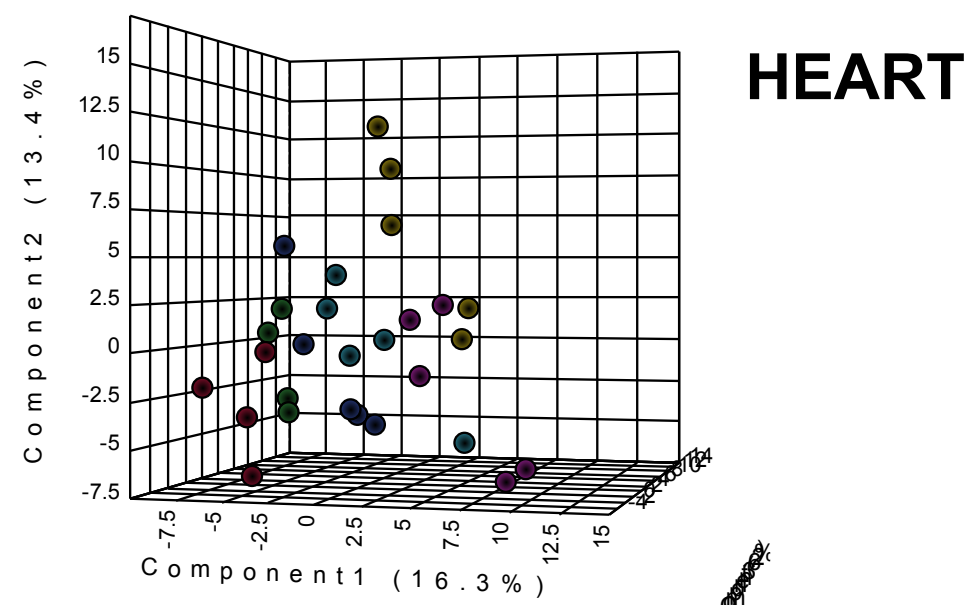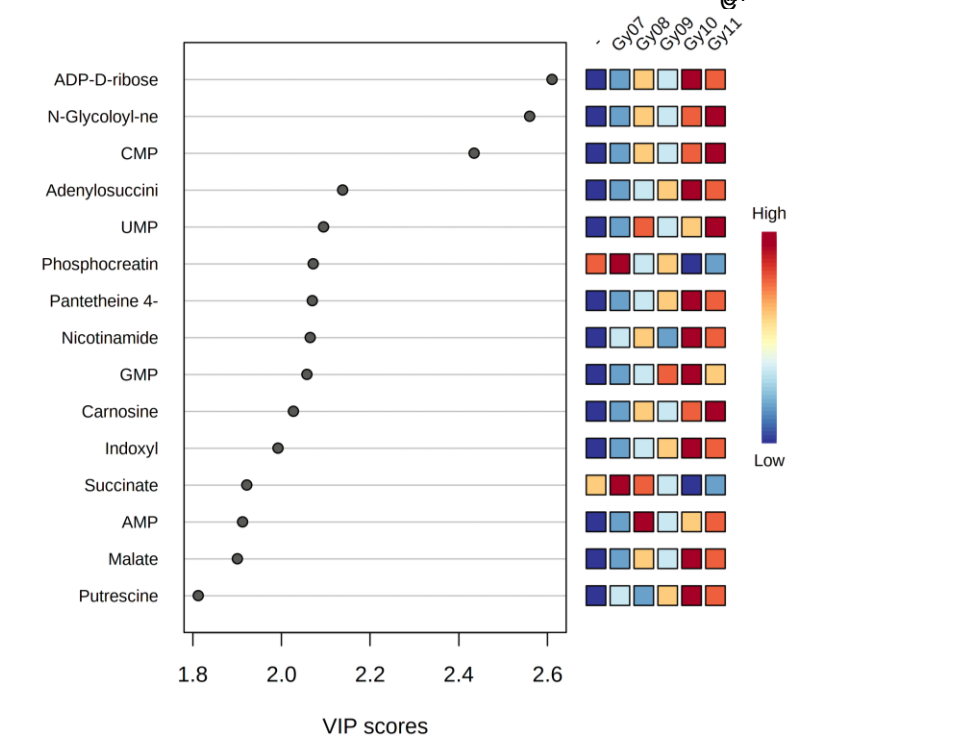

**Supp Fig 1.O** – Heat map (top 50 ANOVA), Principal Component Analysis and VIP Score plots for heart metabolites in response to radiation.



**TCA**

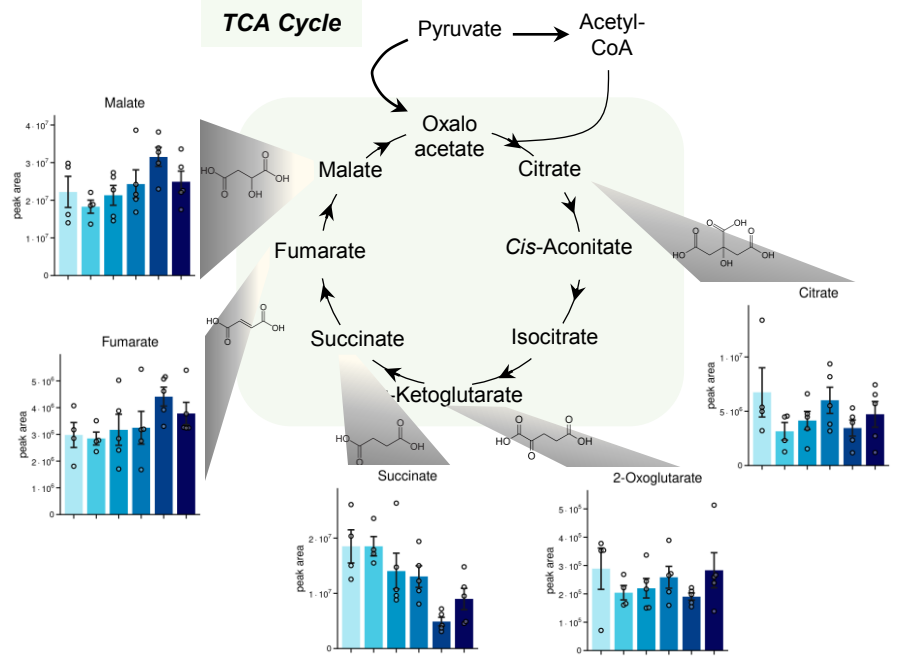

Purine ●  
Metabolism

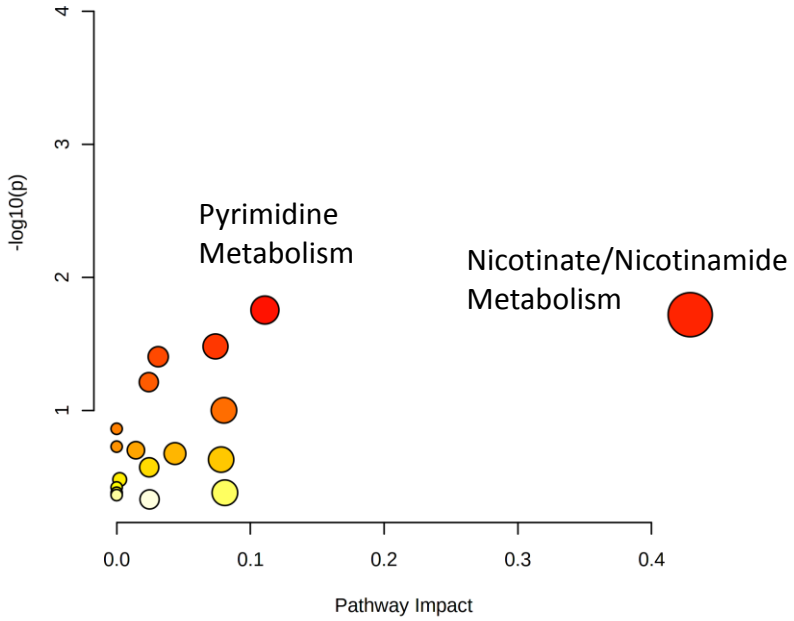

**HEART**

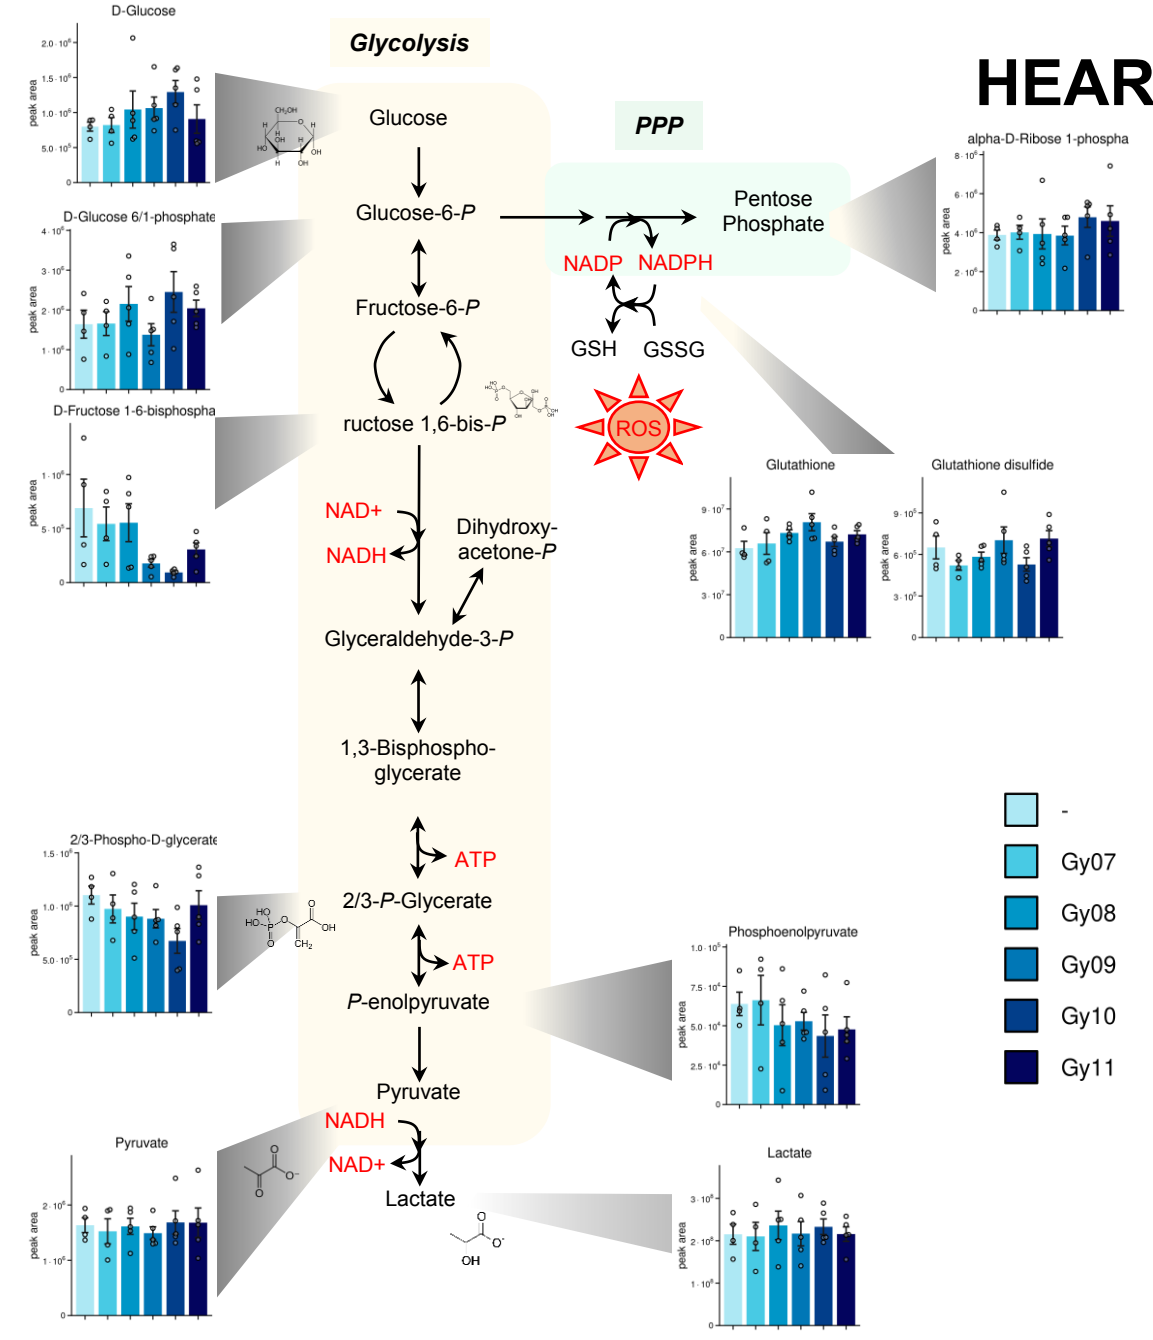

**Supp Fig 1.P** – Bar plots on the impact of radiation on the TCA cycle, glycolysis and pathway analysis of top metabolic effects in the heart.

# HEART

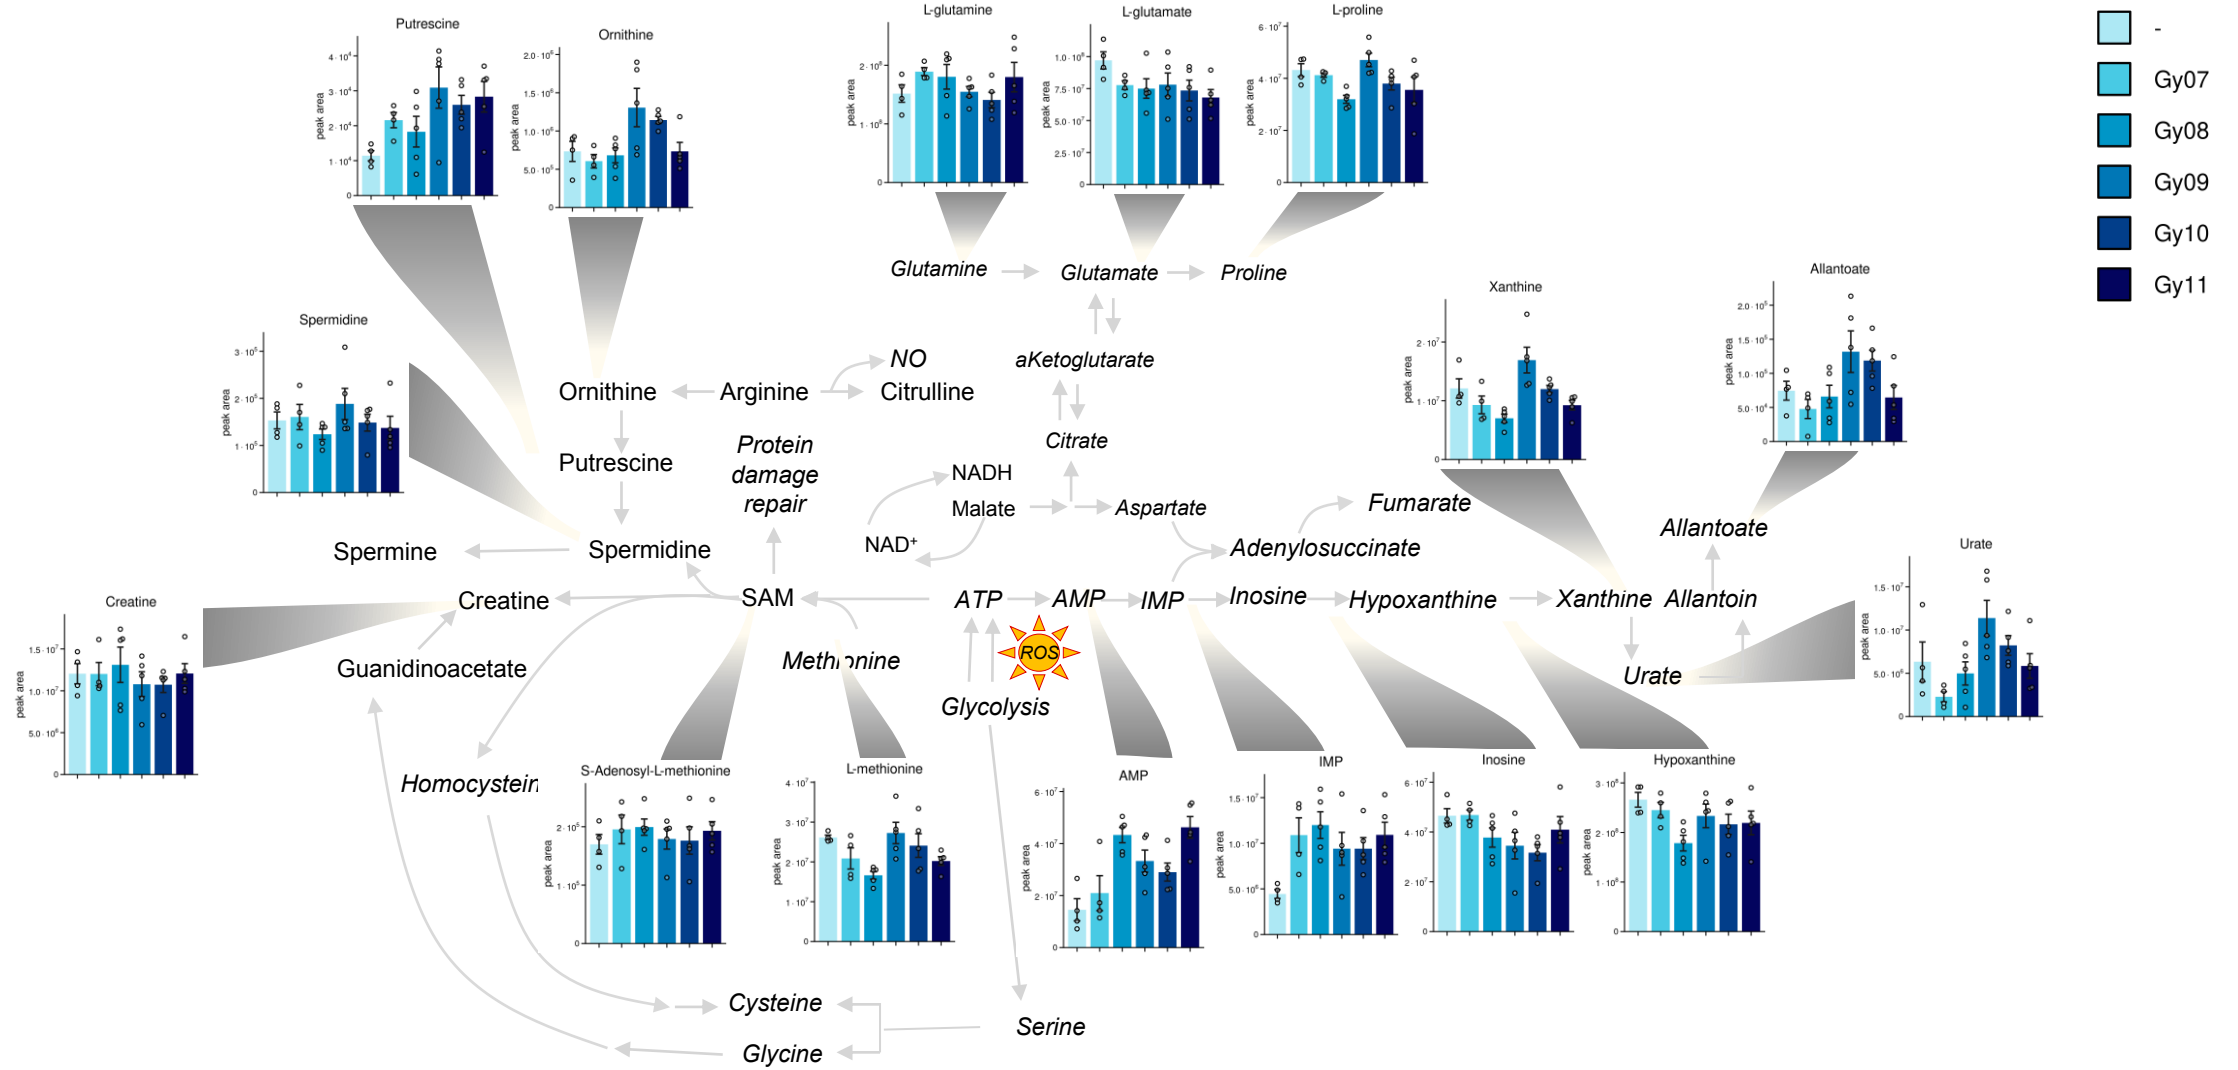

**Supp Fig 1.Q** – Bar plots on the impact of radiation on protein damage and repair pathways in the heart.

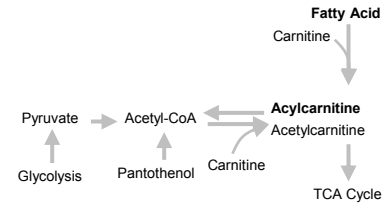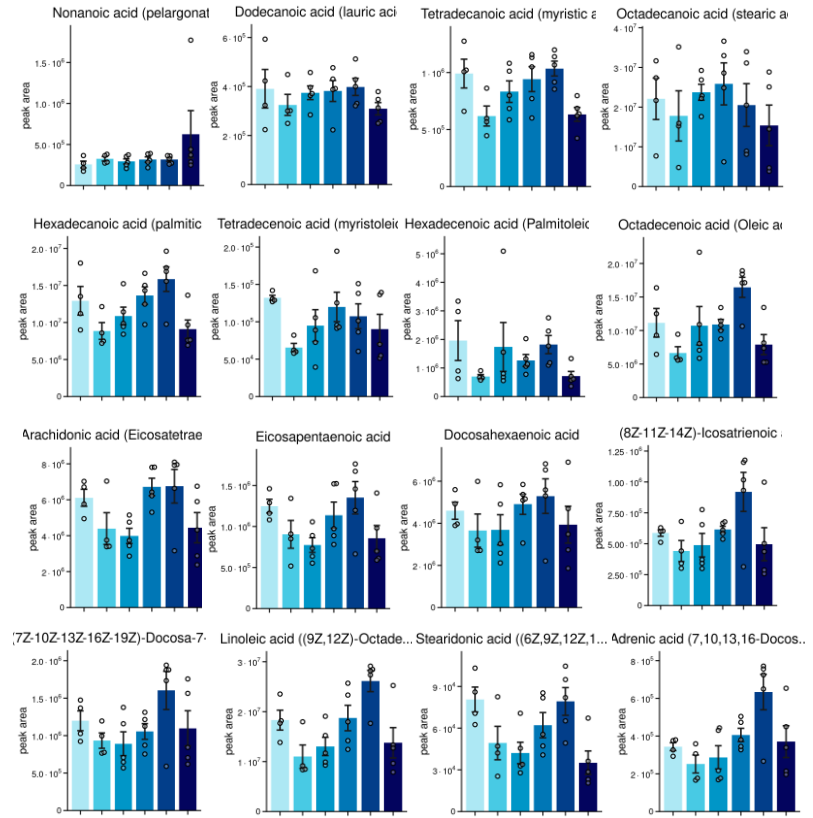

Fatty Acids

Supp Fig 1.R – Bar plots showing the impact of radiation on fatty acids in the heart.

# BRAIN

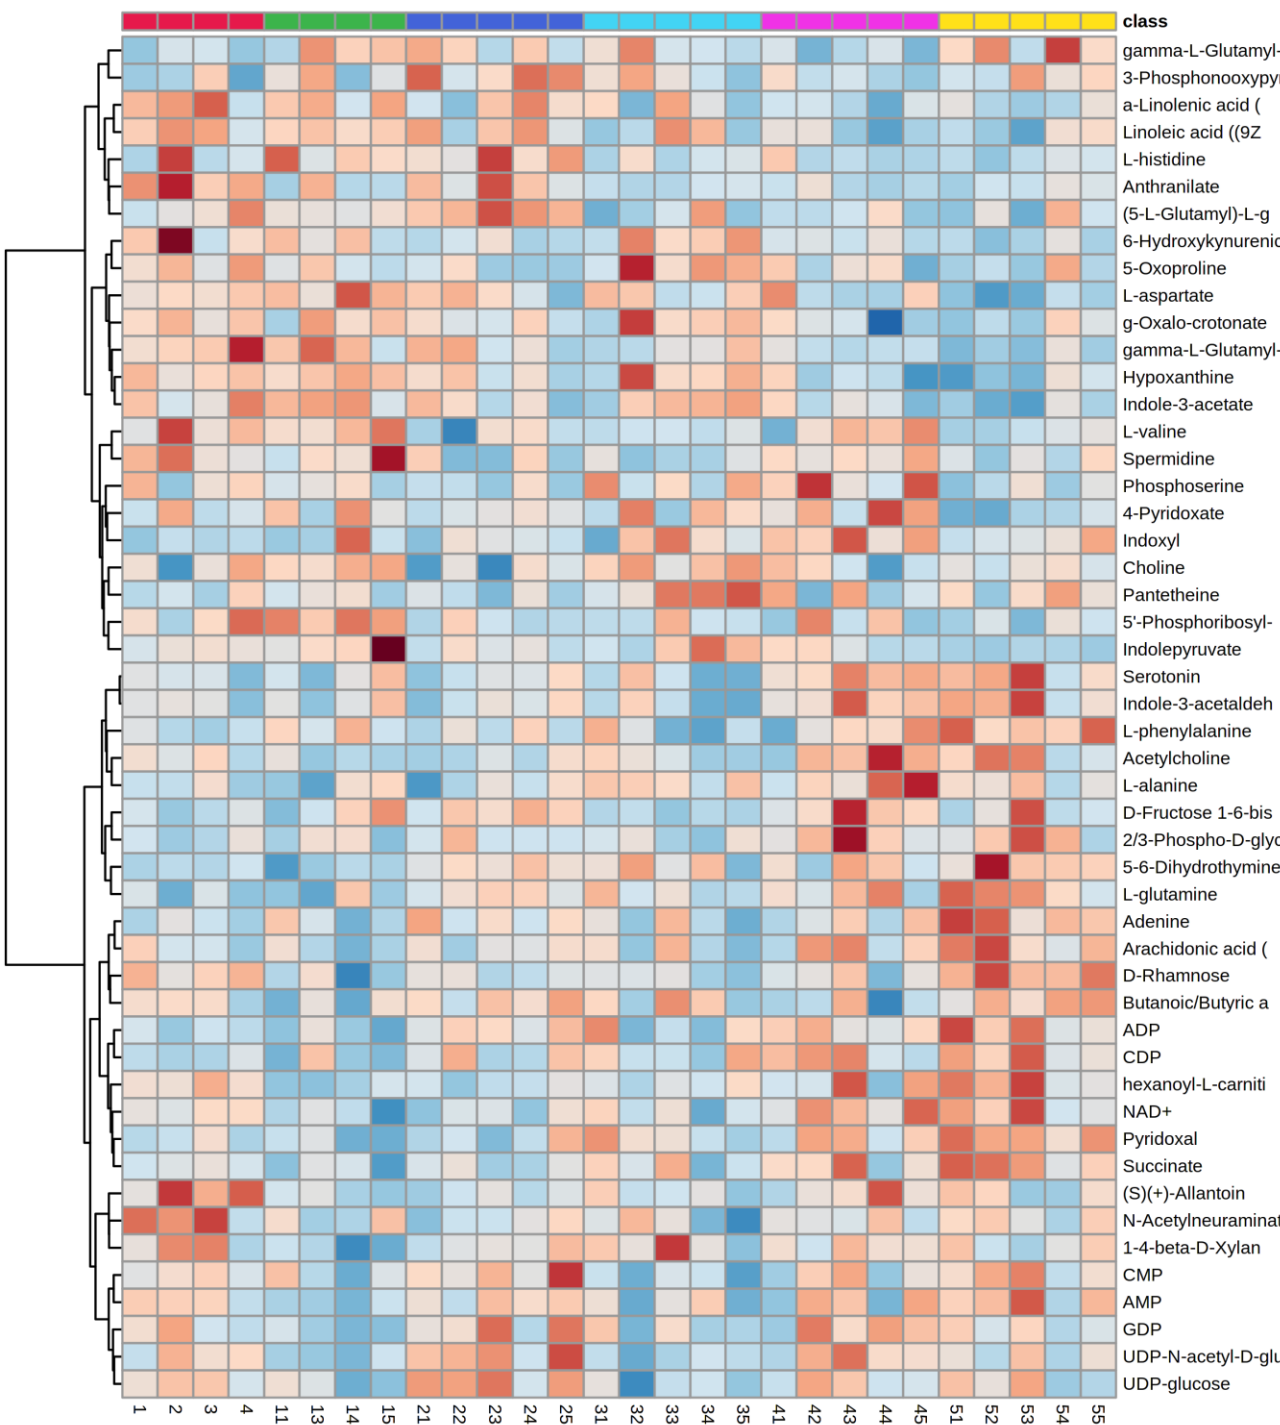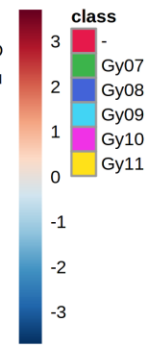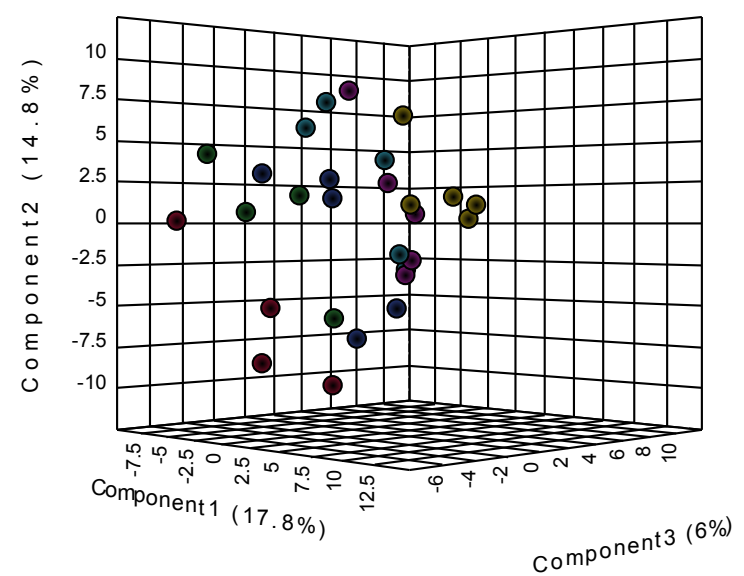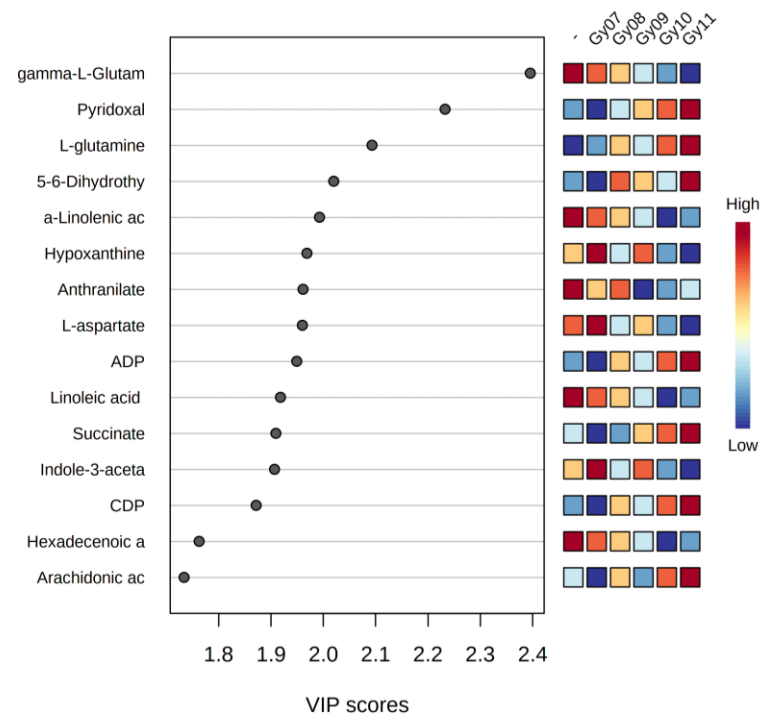

Supp Fig 1.S – Heat map (top 50 ANOVA), Principal Component Analysis and VIP Score plots for brain metabolites in response to radiation.

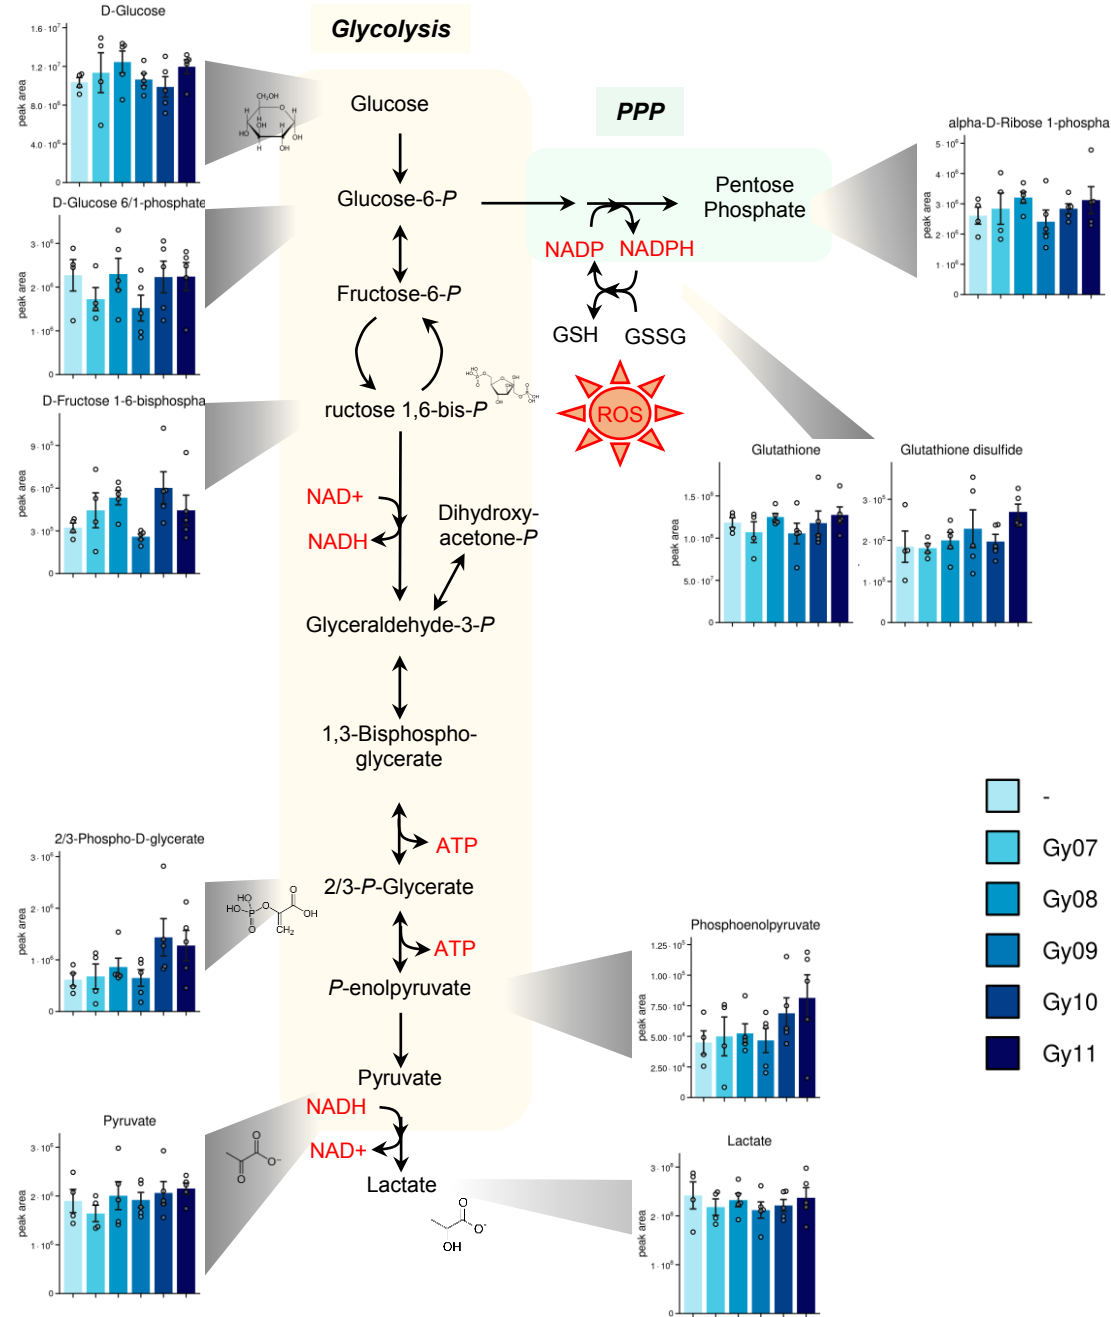

Supp Fig 1.T – Bar plots on the impact of radiation on glycolysis in the brain.

# BRAIN

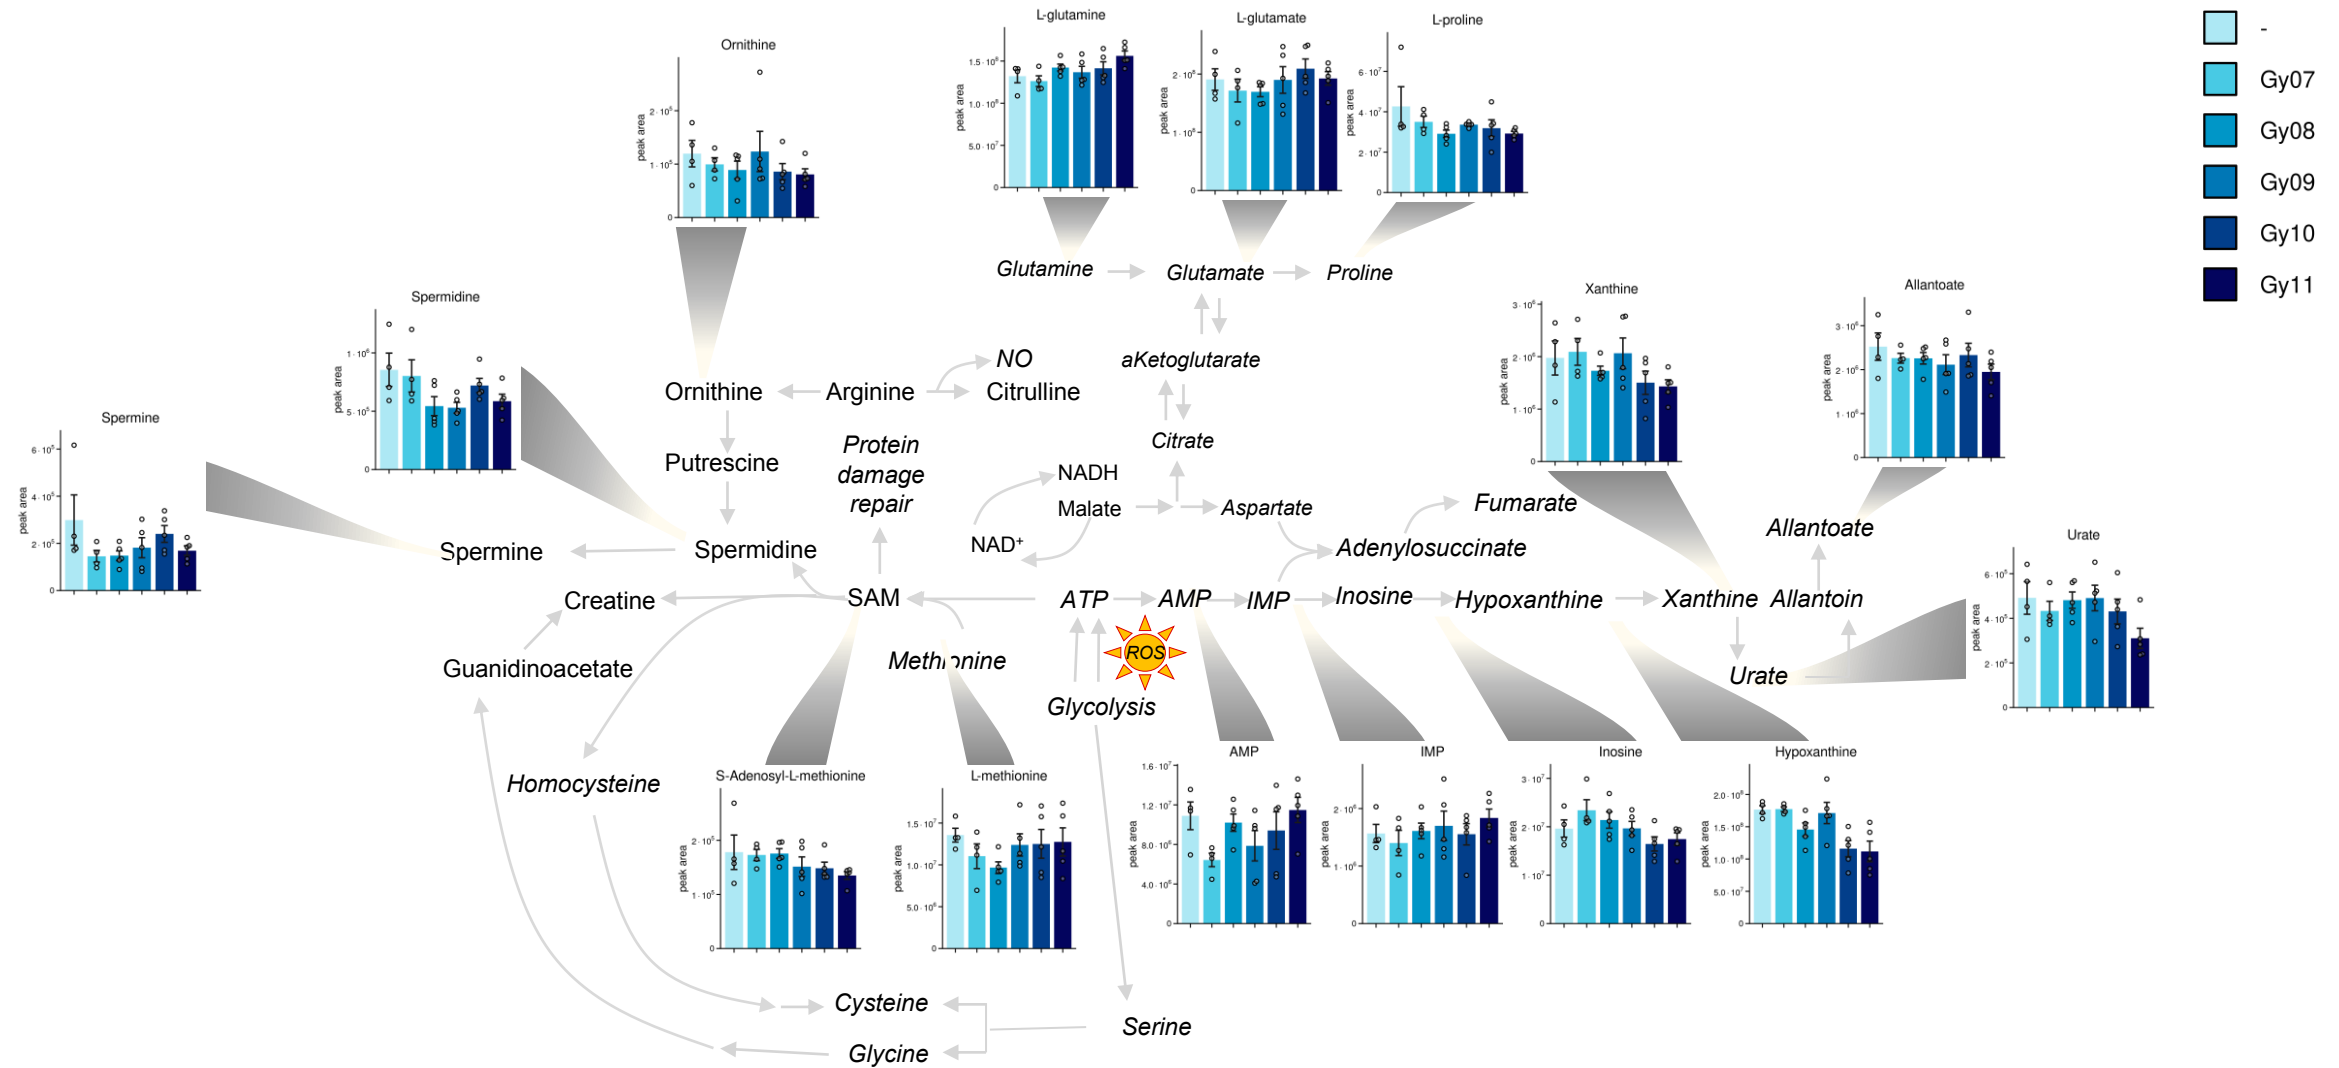

**Supp Fig 1.U** – Bar plots on the impact of radiation on protein damage and repair pathways in the brain.

# COLON

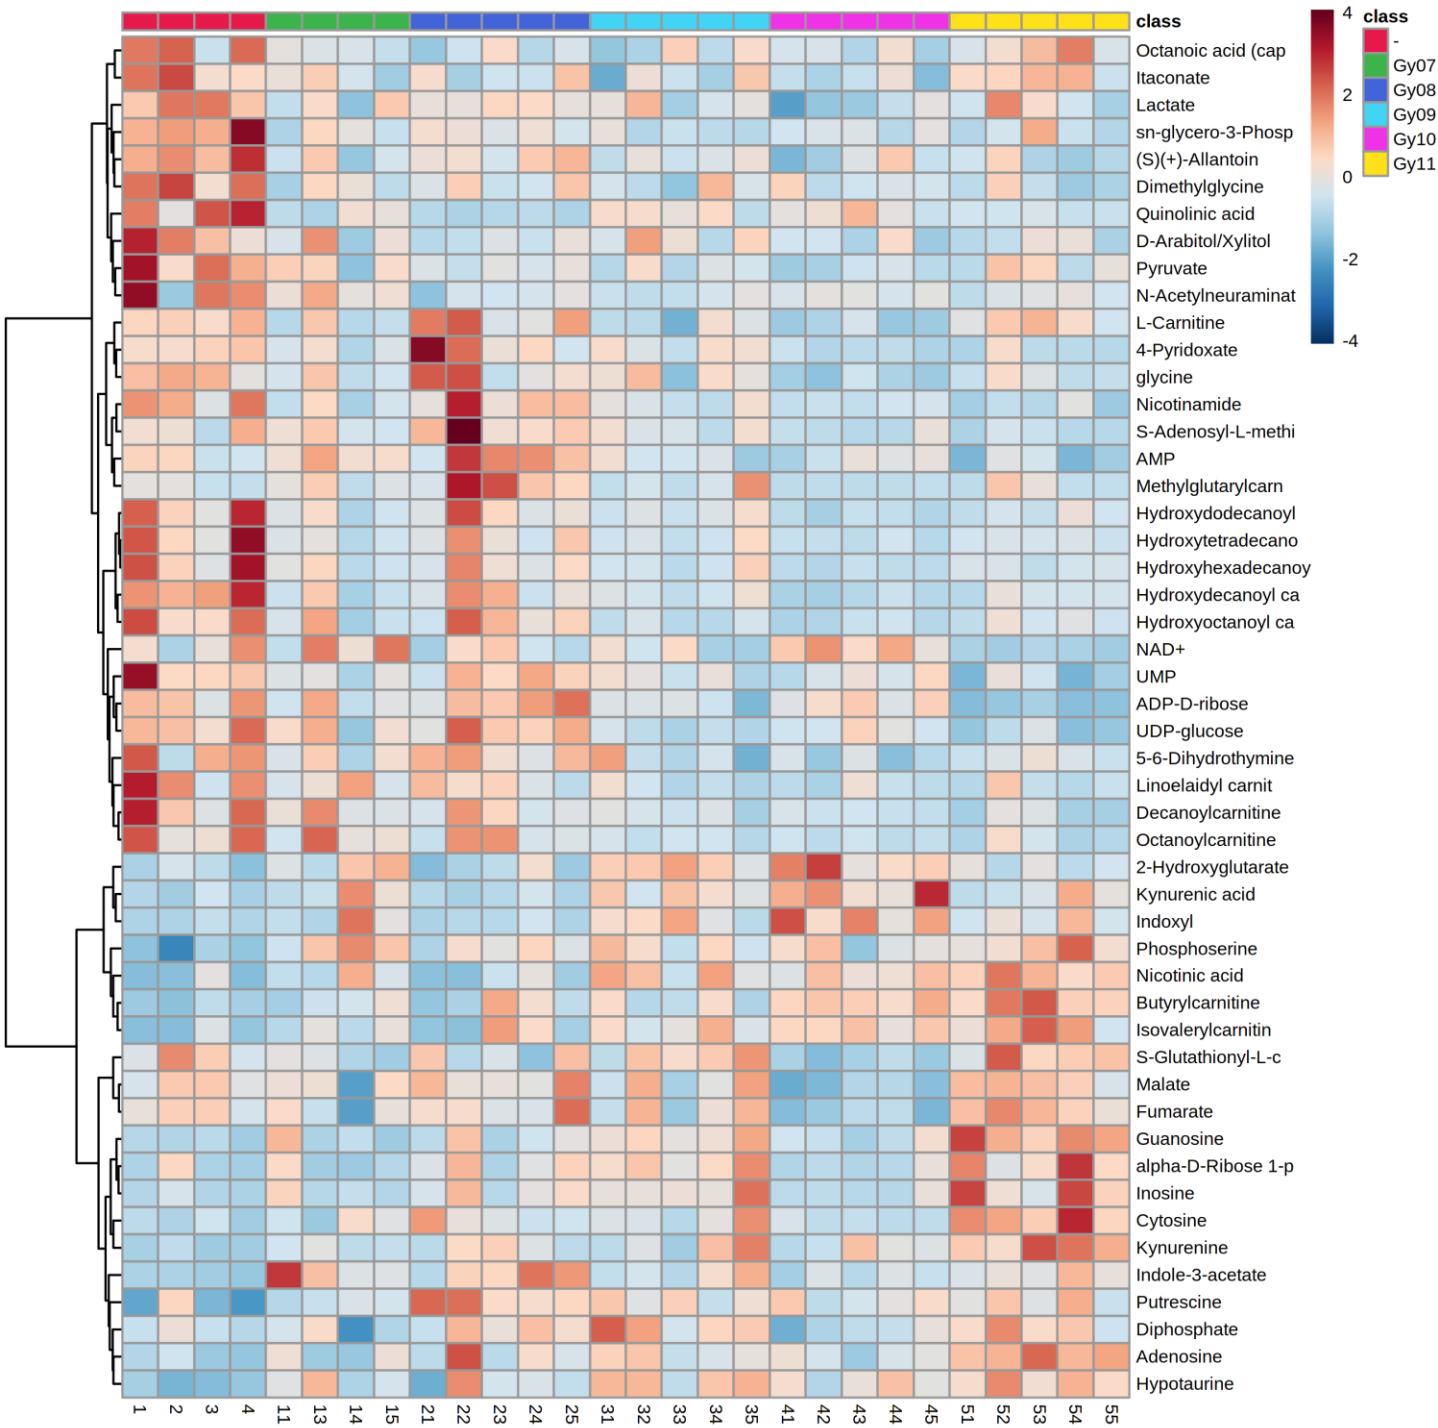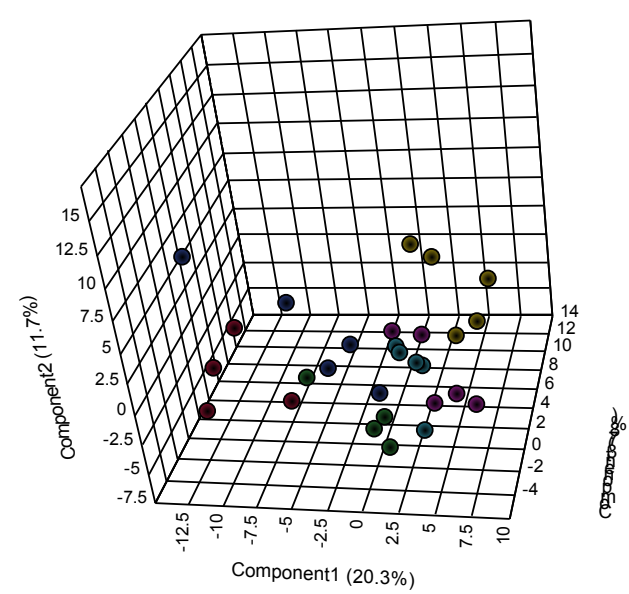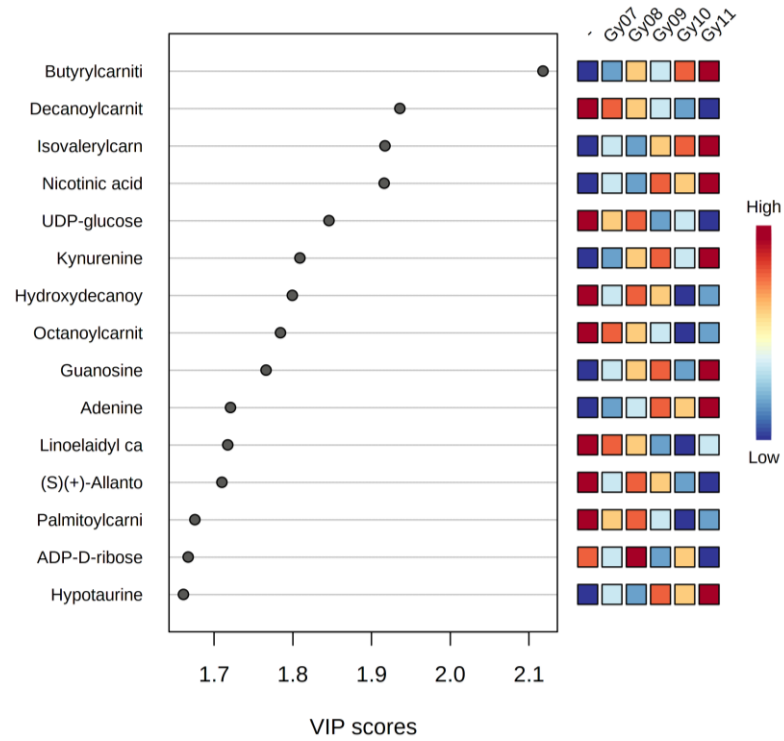

**Supp Fig 1.V**– Heat map (top 50 ANOVA), Principal Component Analysis and VIP Score plots for colon metabolites in response to radiation.

**TCA**

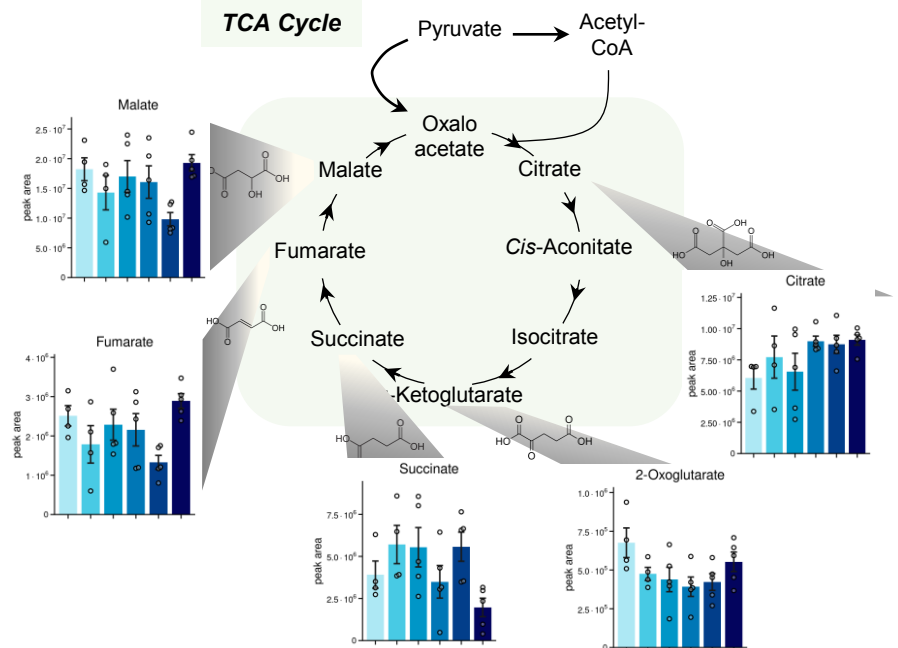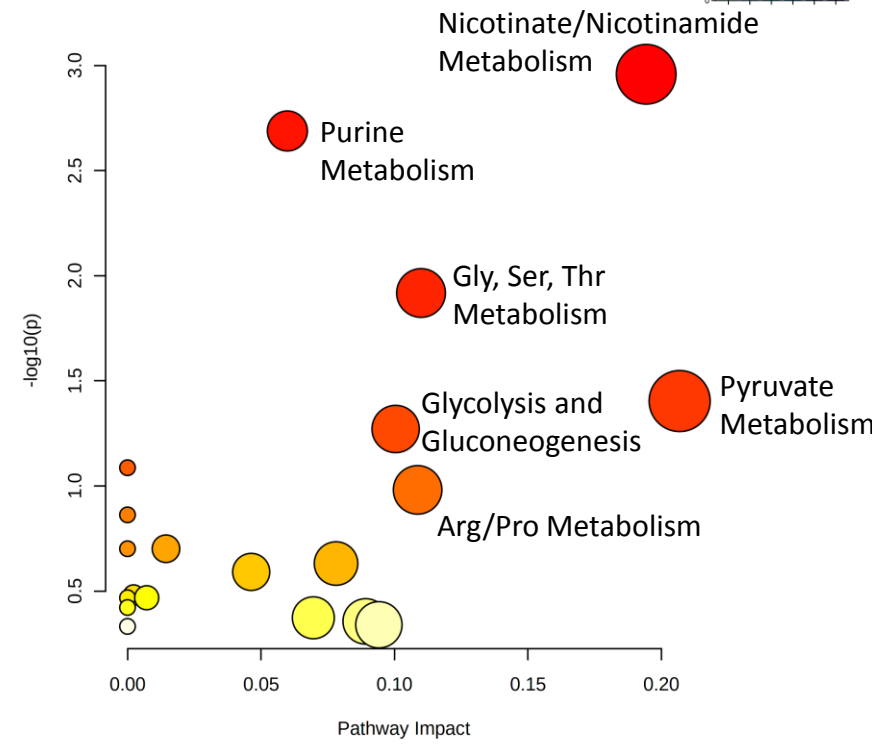

**COLON**

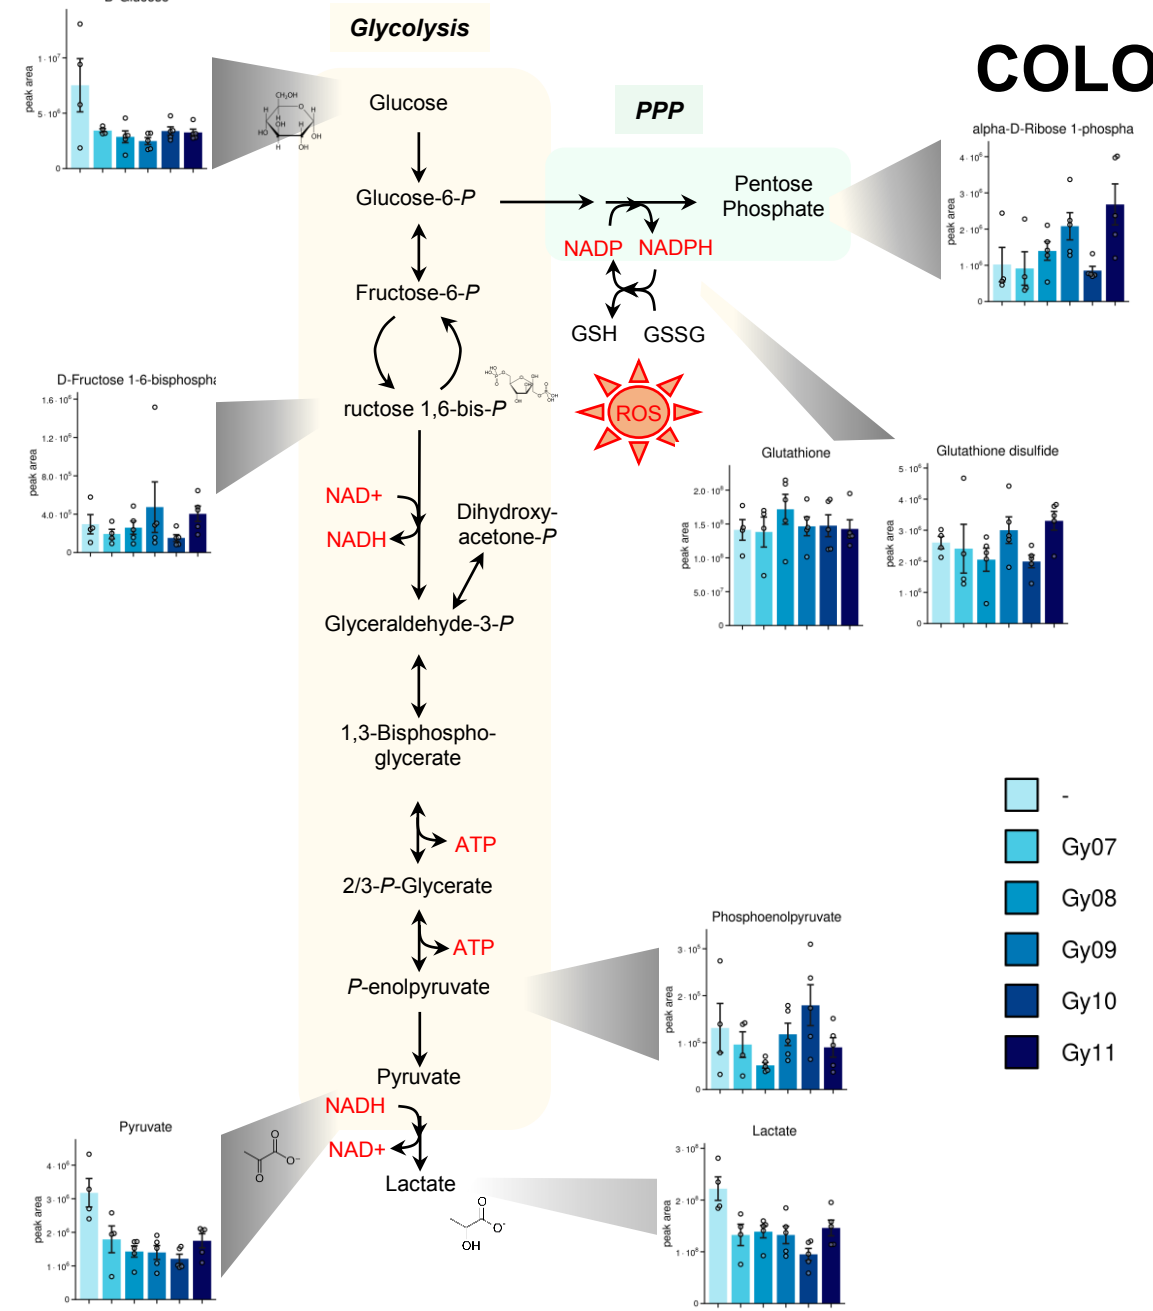

**Supp Fig 1.W** – Bar plots on the impact of radiation on the TCA cycle, glycolysis and pathway analysis of top metabolic effects in the colon.



# COLON

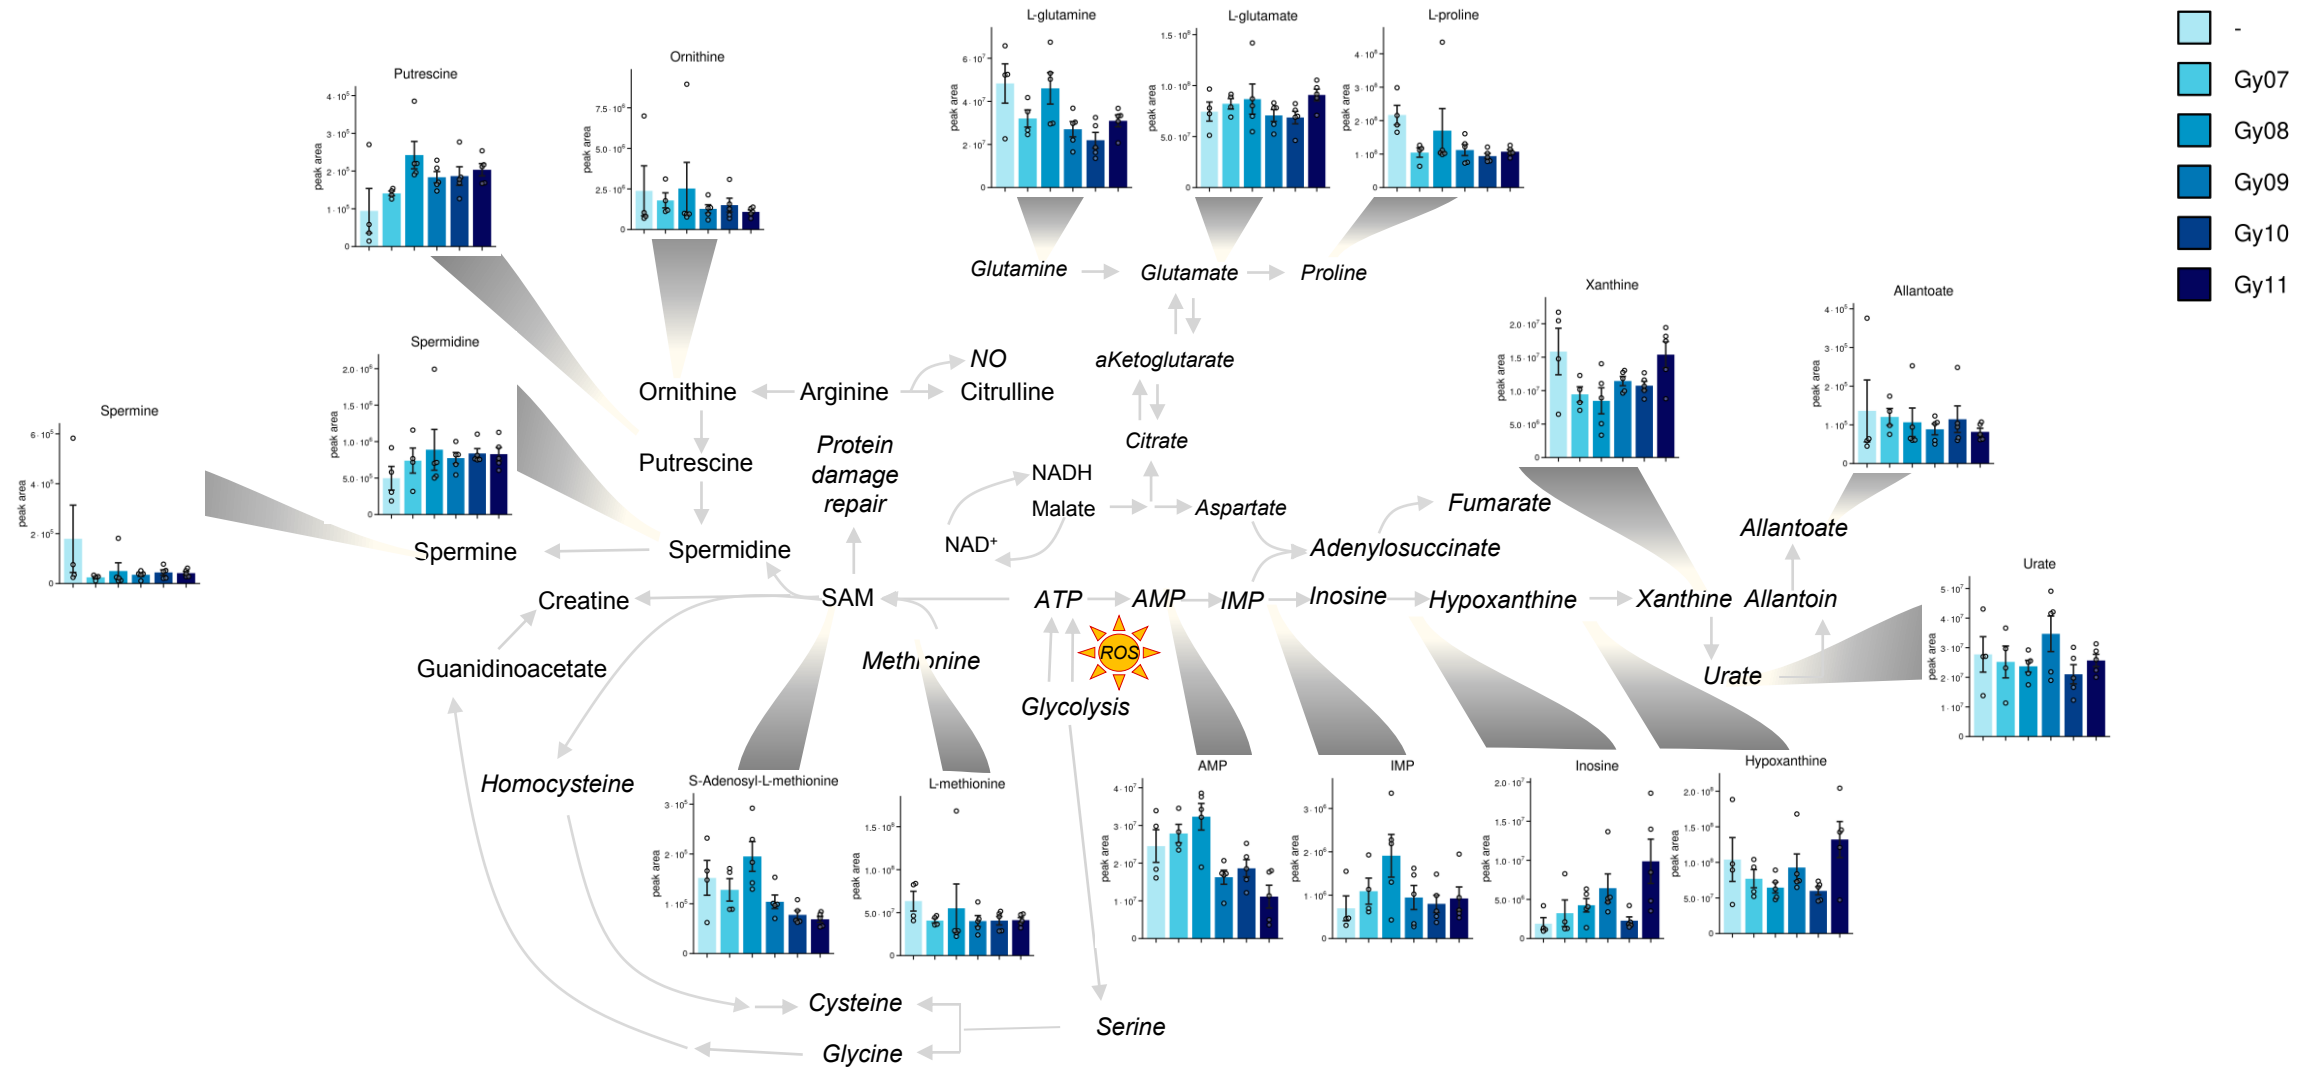

**Supp Fig 1.X** – Bar plots on the impact of radiation on protein damage and repair pathways in the colon.

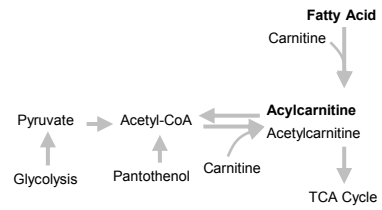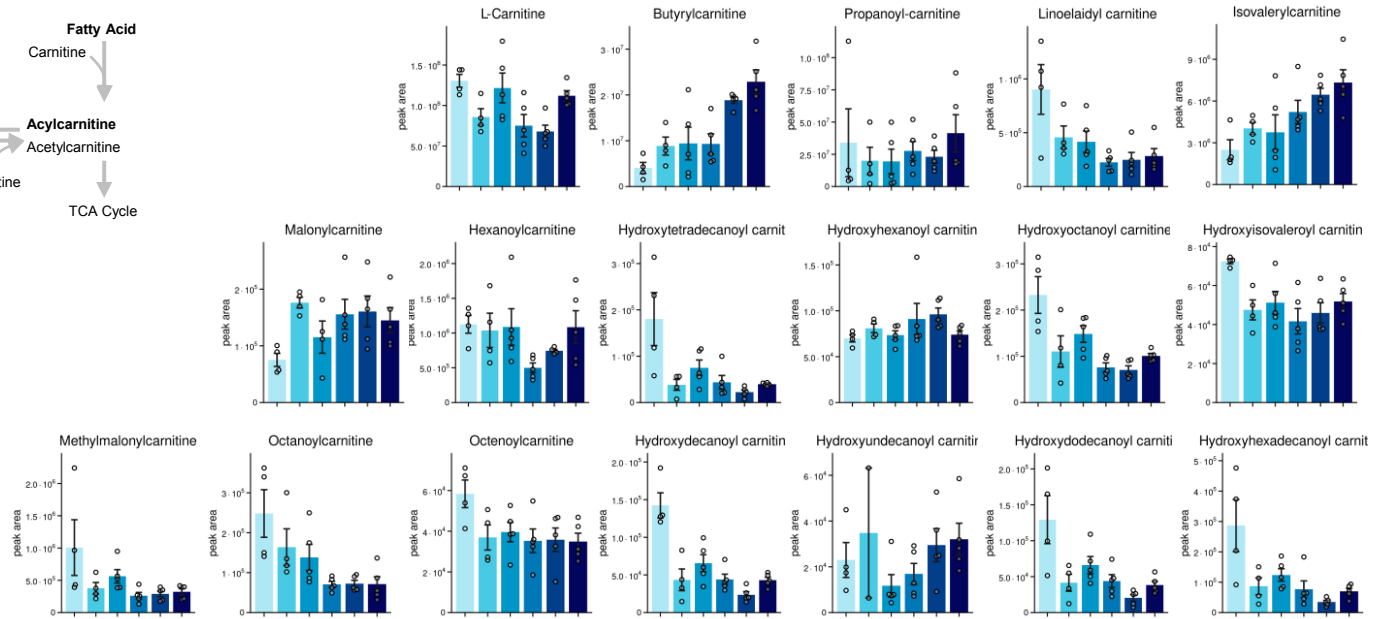

Acylcarnitines

Supp Fig 1.Y – Bar plots showing the impact of radiation on acylcarnitines in the colon.

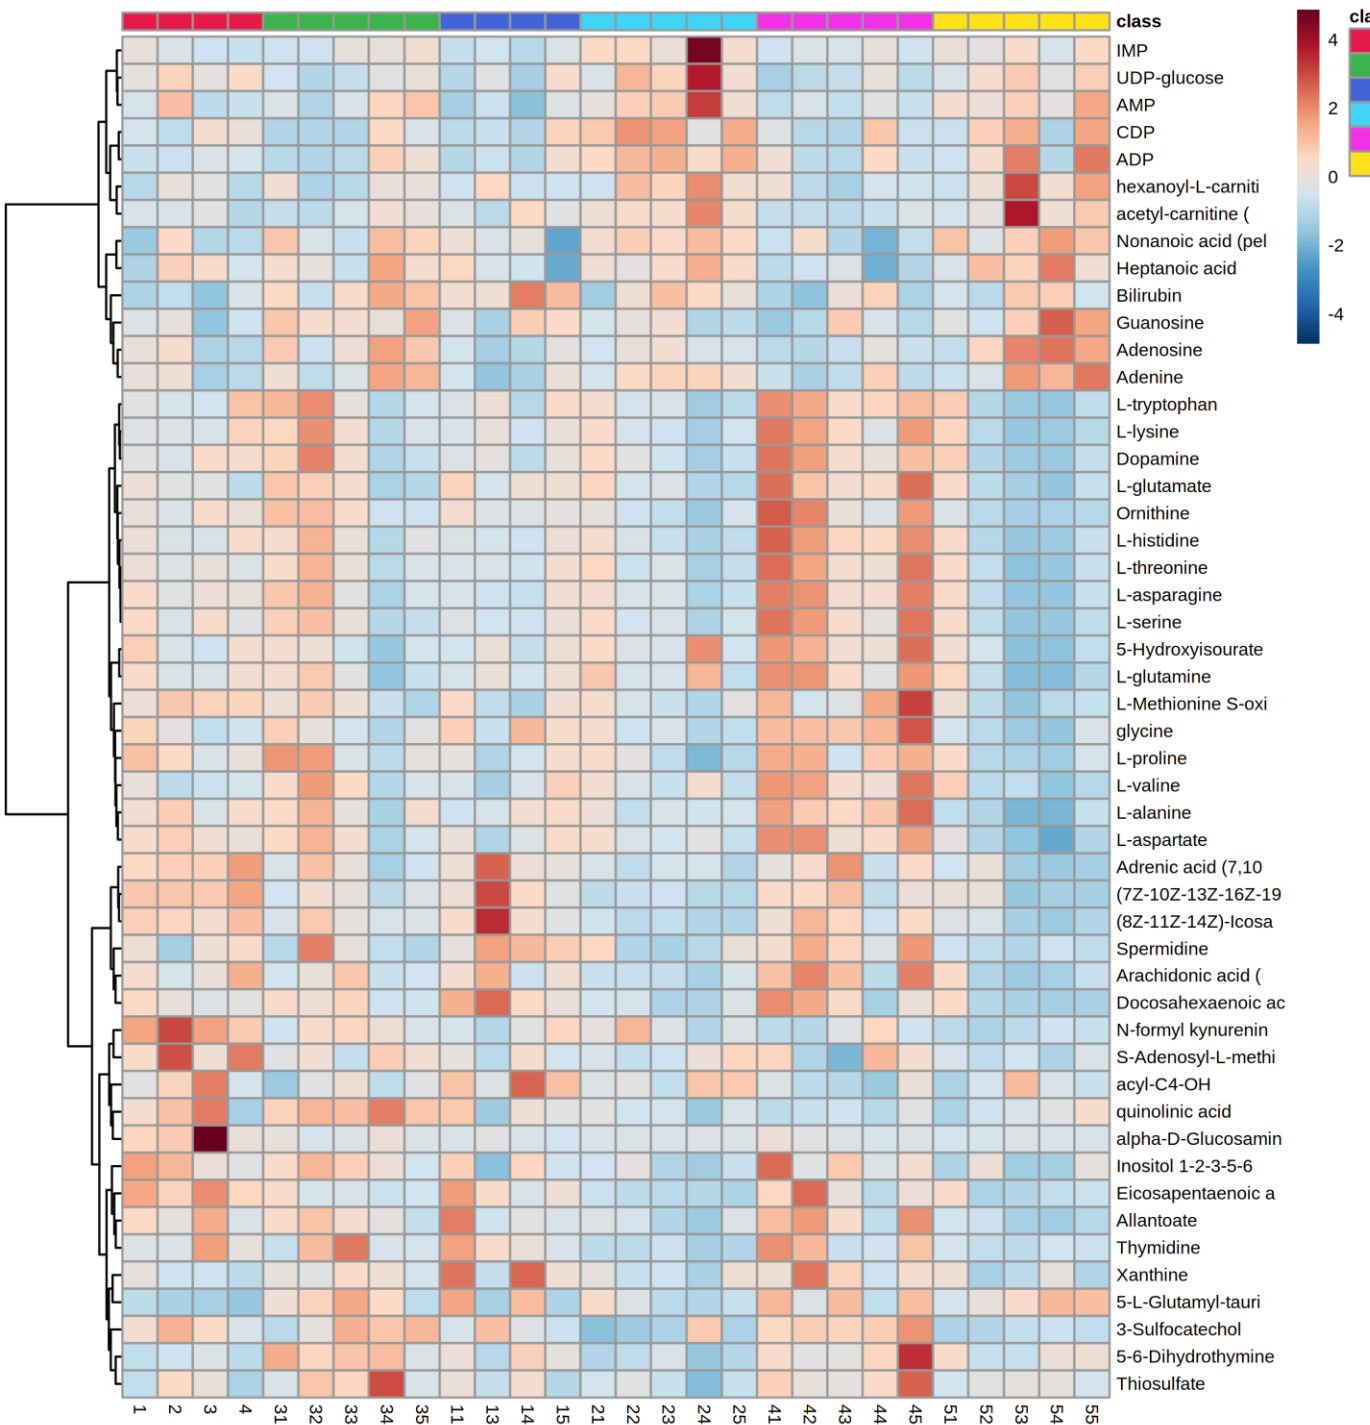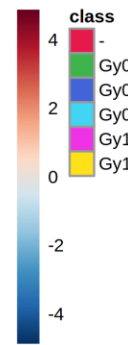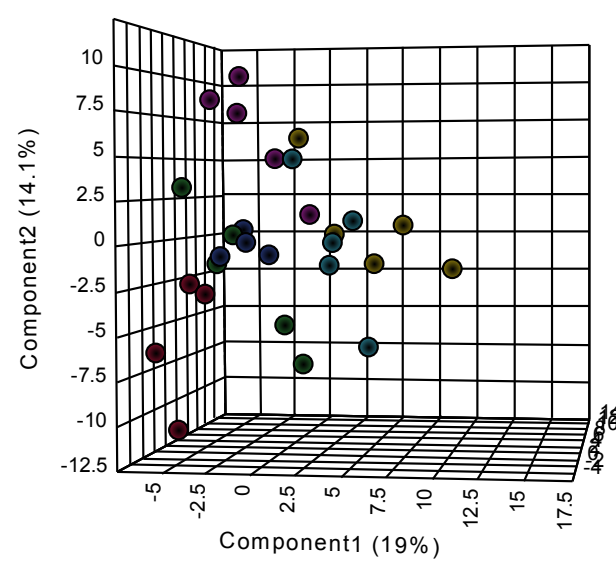

# DUODENUM

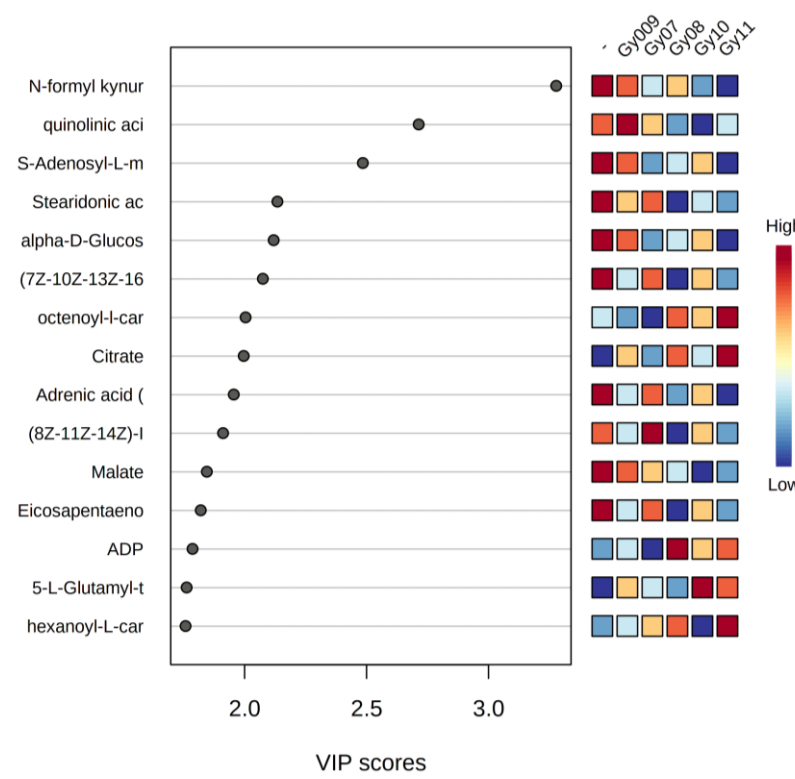

**Supp Fig 1.Z**– Heat map (top 50 ANOVA), Principal Component Analysis and VIP Score plots for duodenum metabolites in response to radiation.

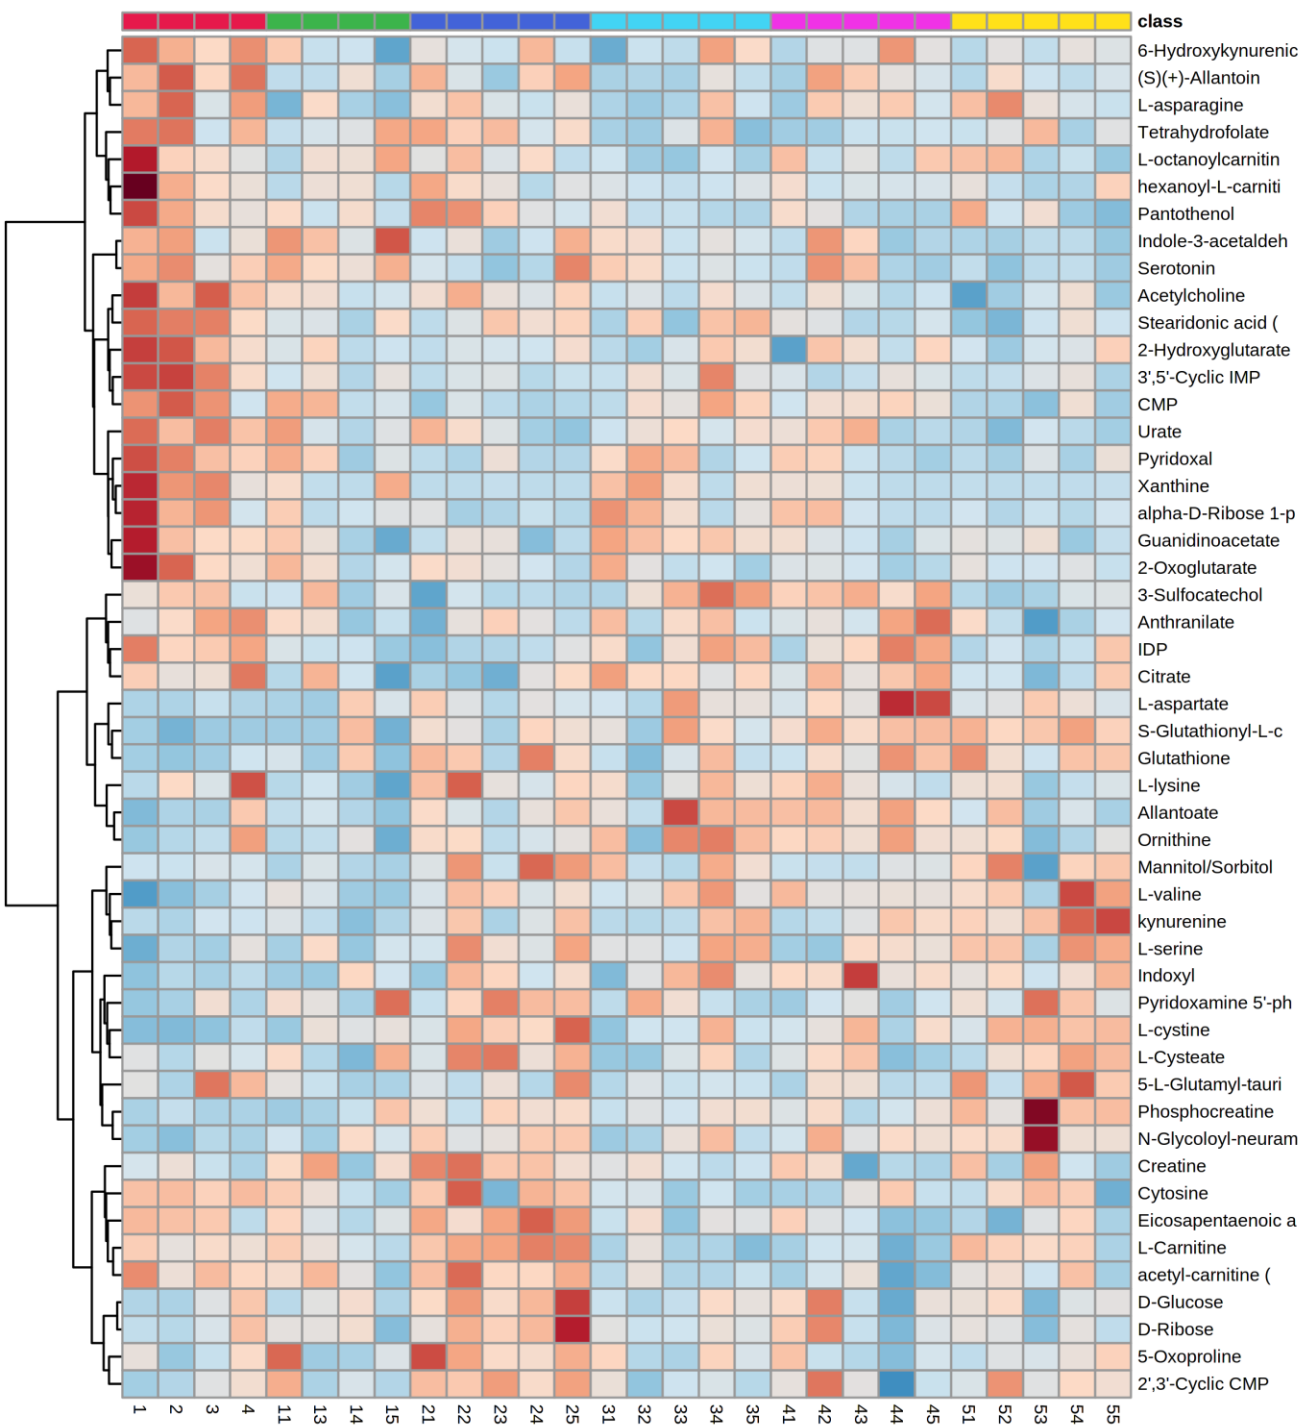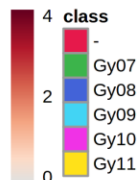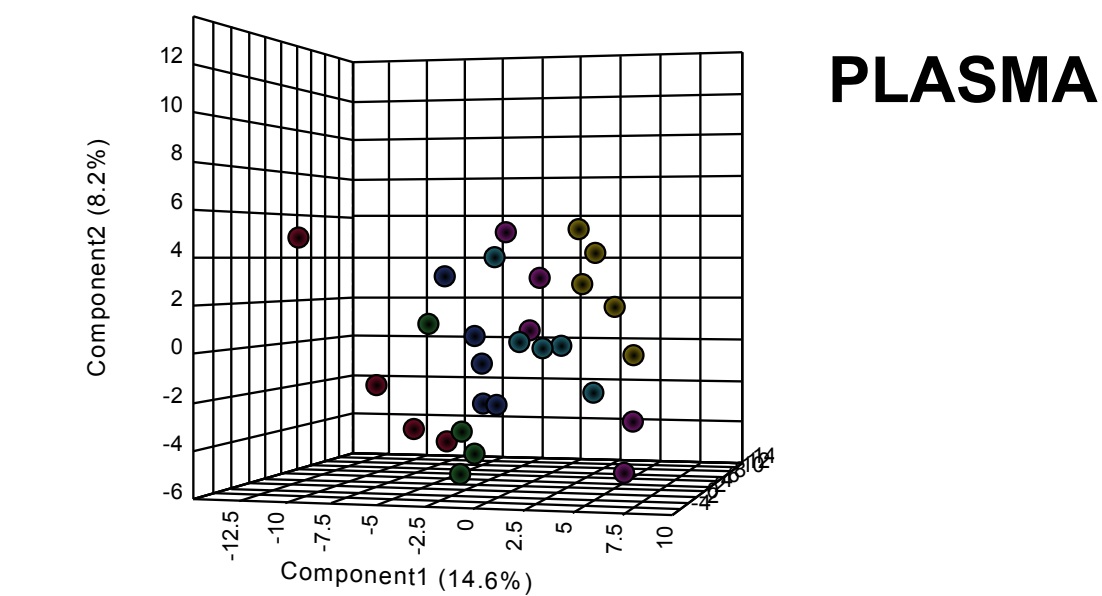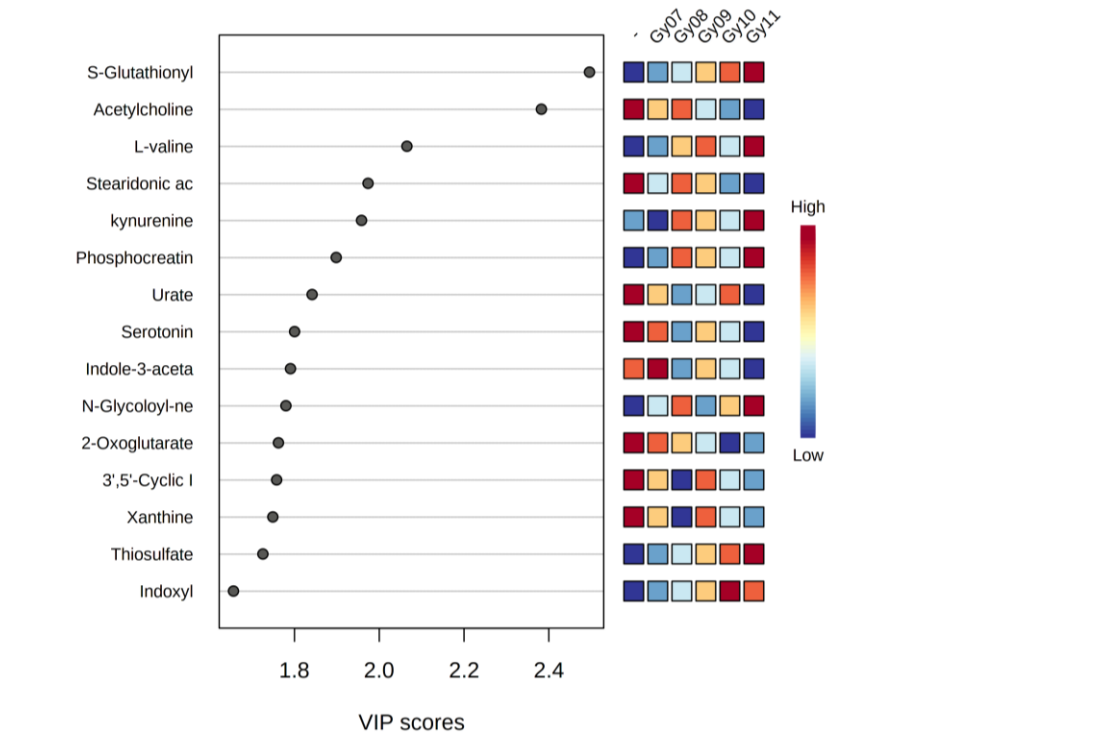

**Supp Fig 1.AA**– Heat map (top 50 ANOVA), Principal Component Analysis and VIP Score plots for plasma metabolites in response to radiation.

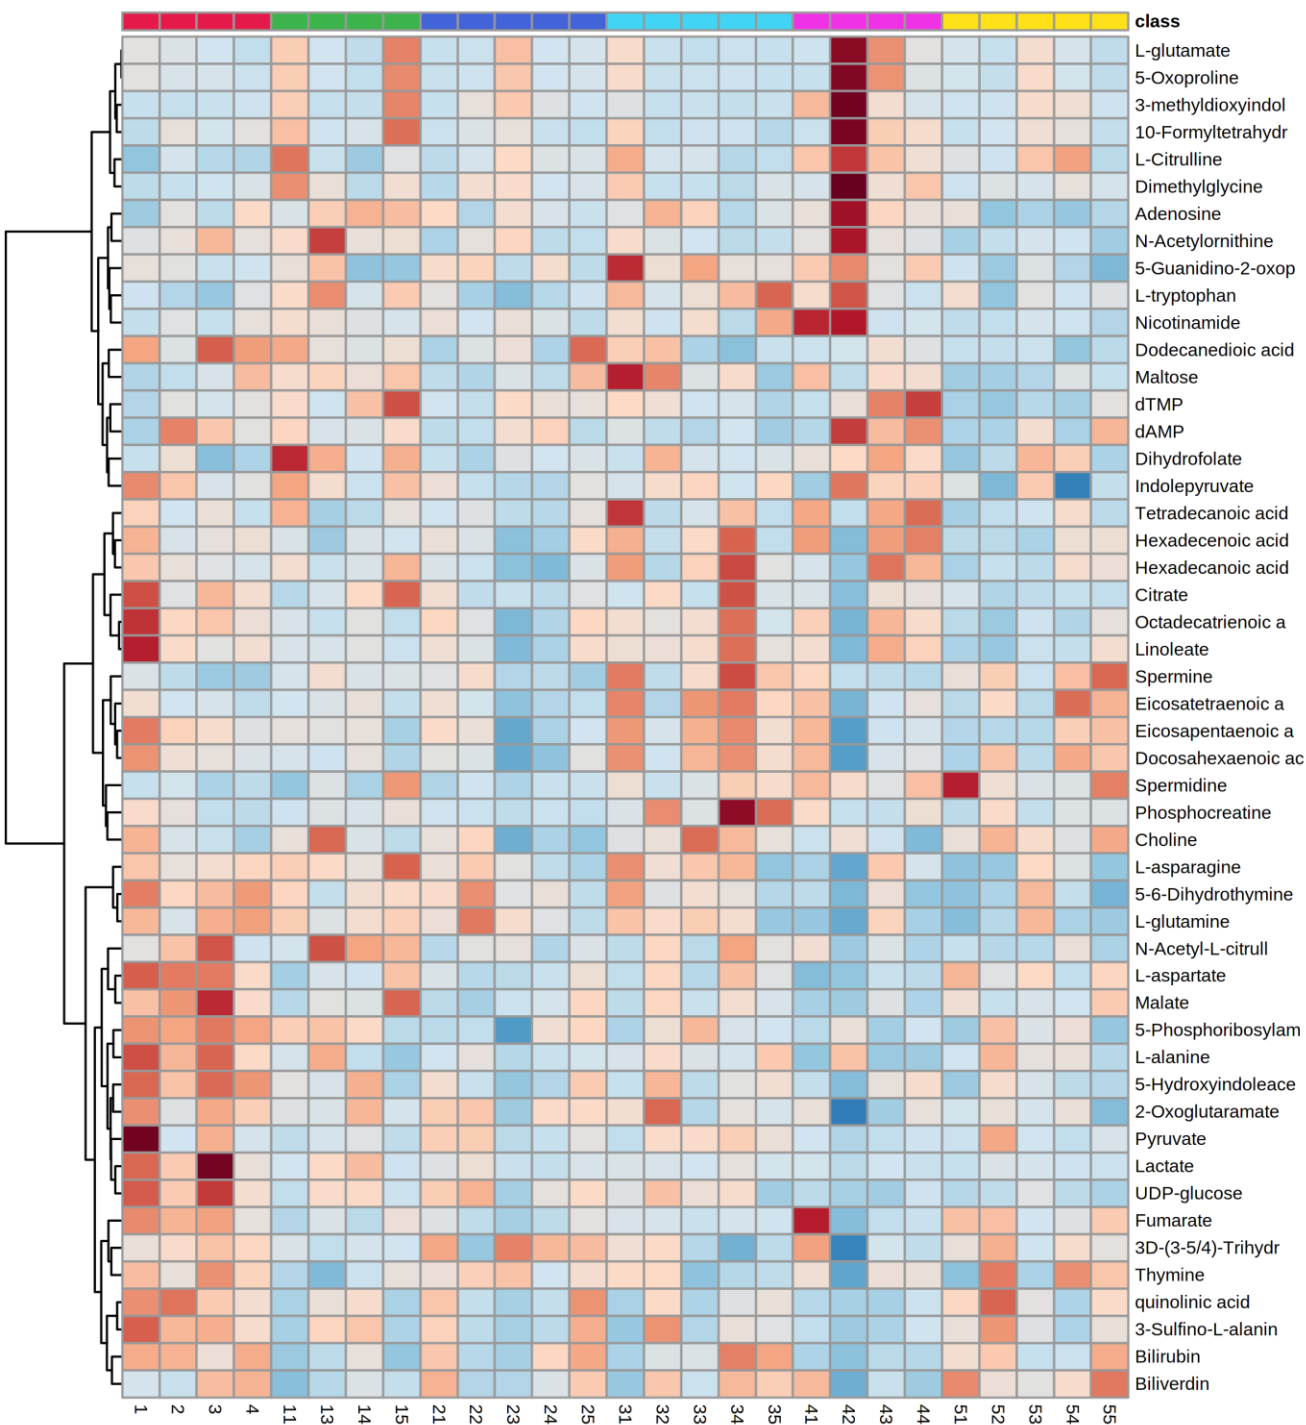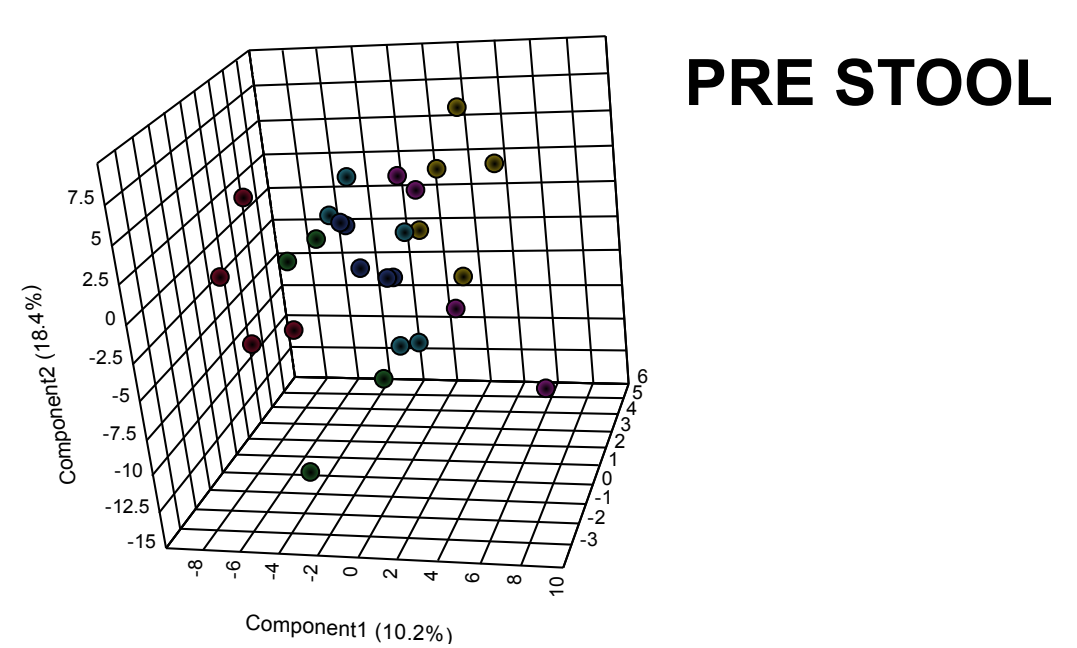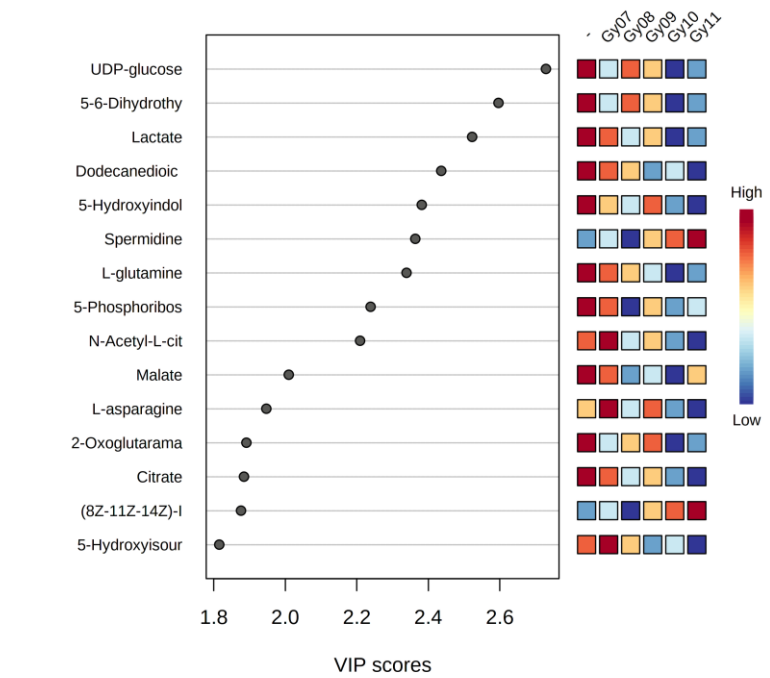

**Supp Fig 1.BB**– Heat map (top 50 ANOVA), Principal Component Analysis and VIP Score plots for stool metabolites prior to radiation (pre-stool).

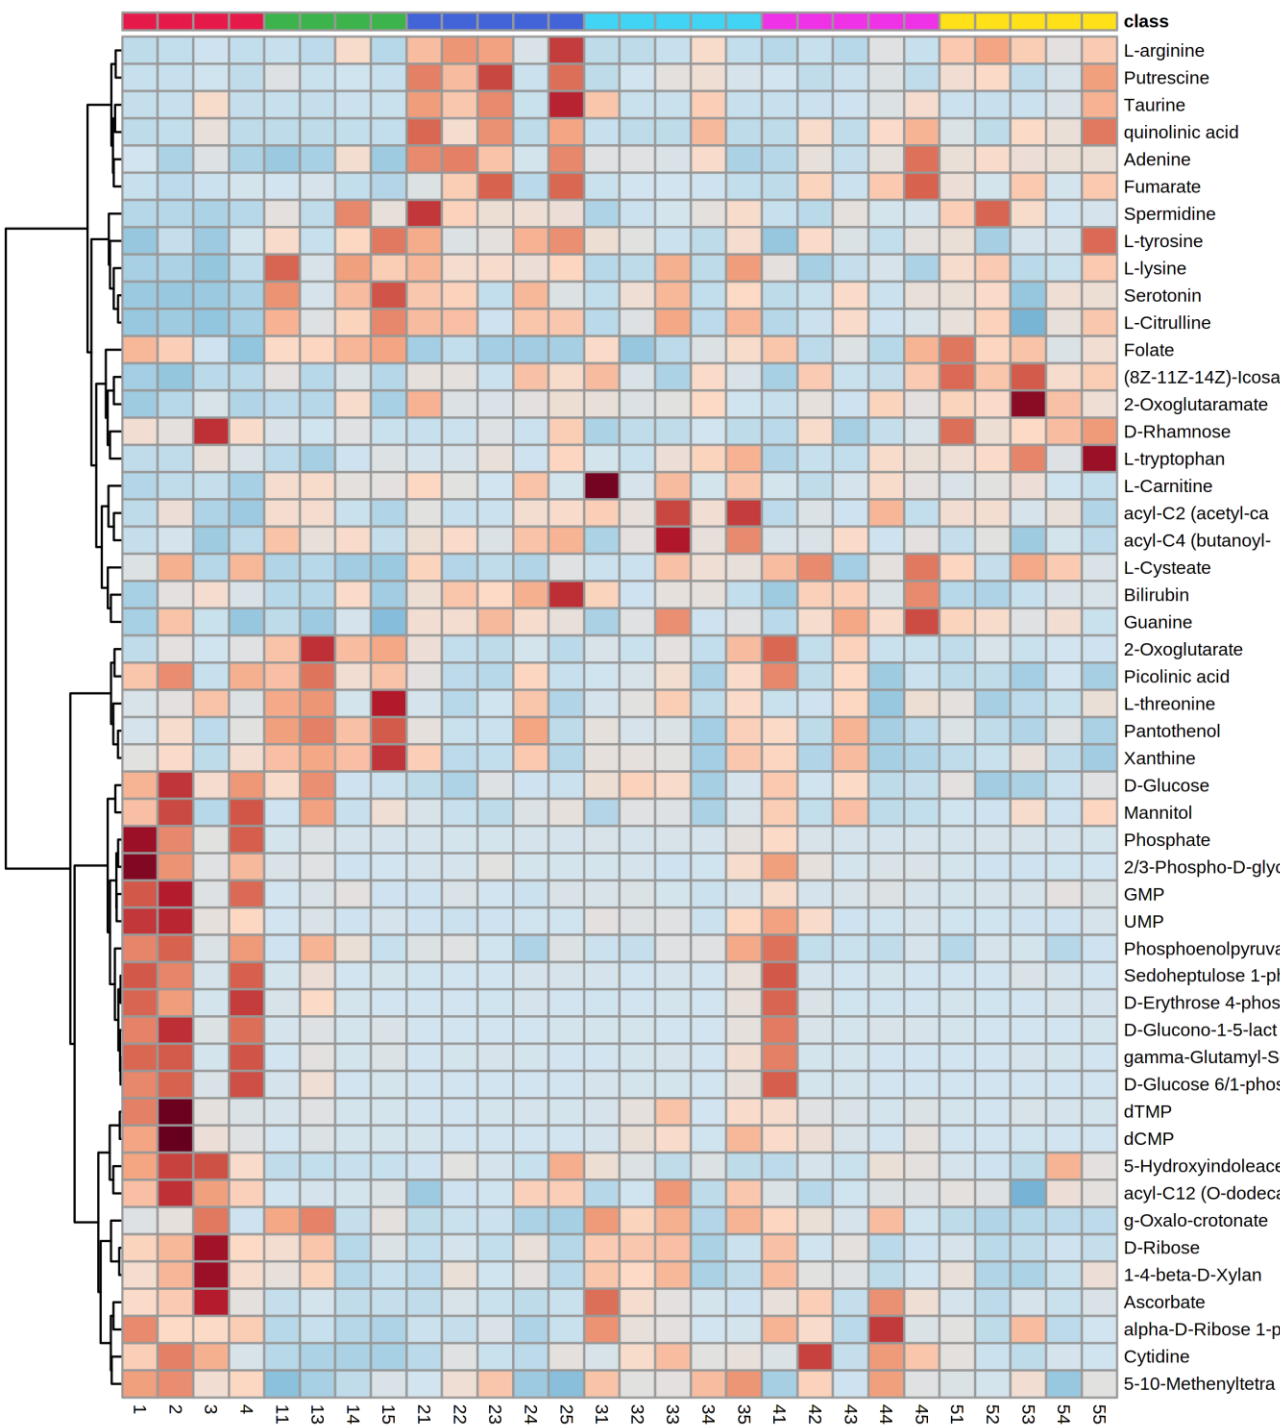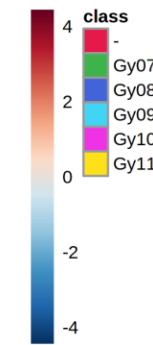

# POST STOOL

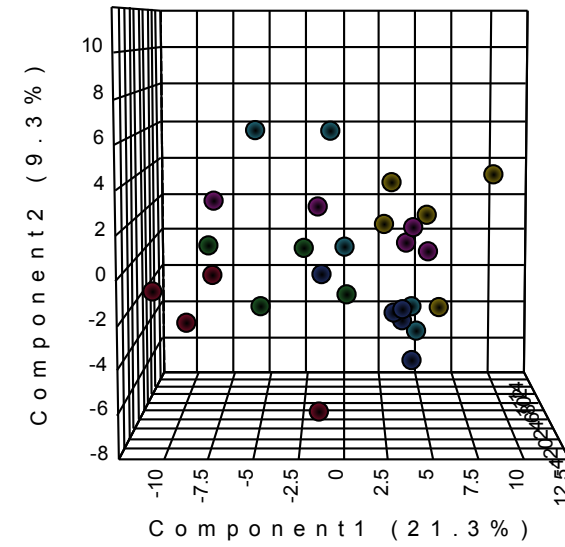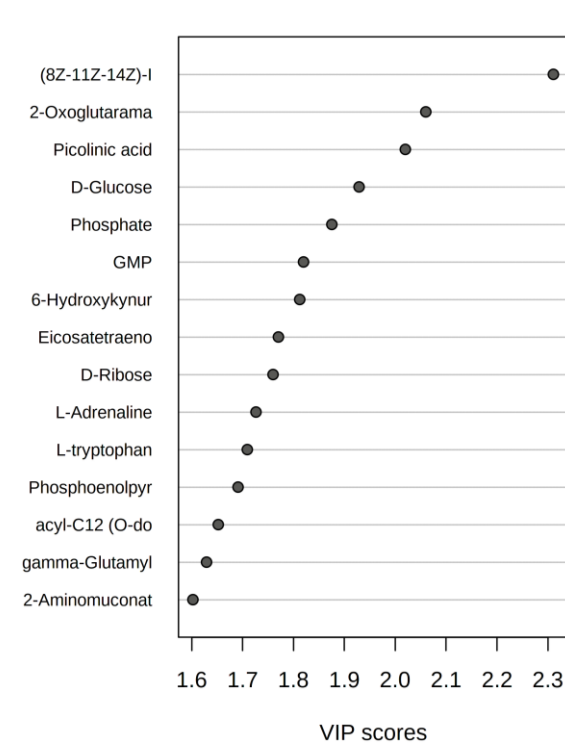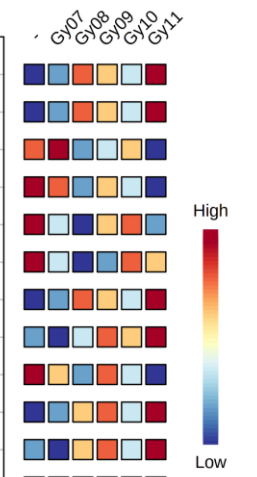

**Supp Fig 1.CC**– Heat map (top 50 ANOVA), Principal Component Analysis and VIP Score plots for stool metabolites in response to radiation (post-stool).

# RBC

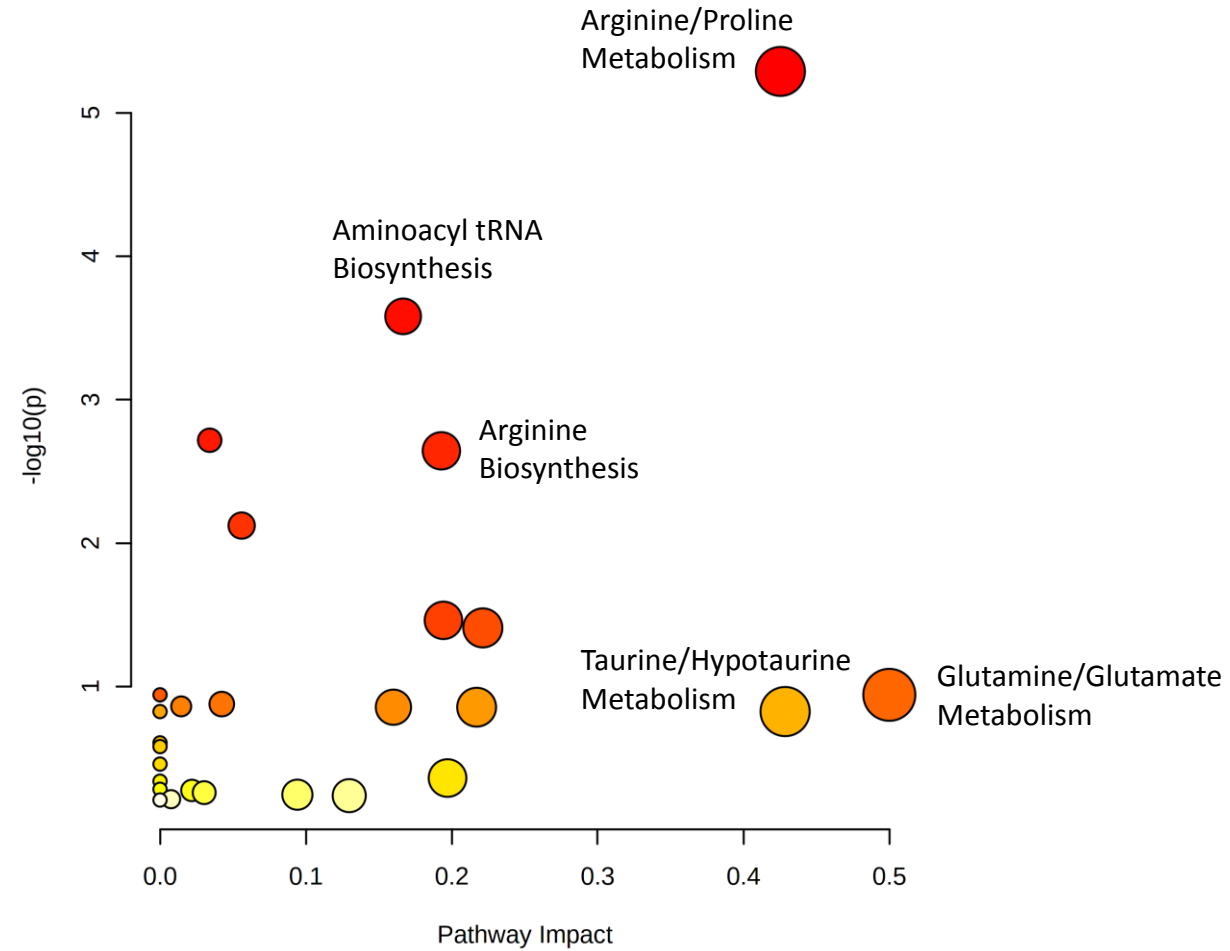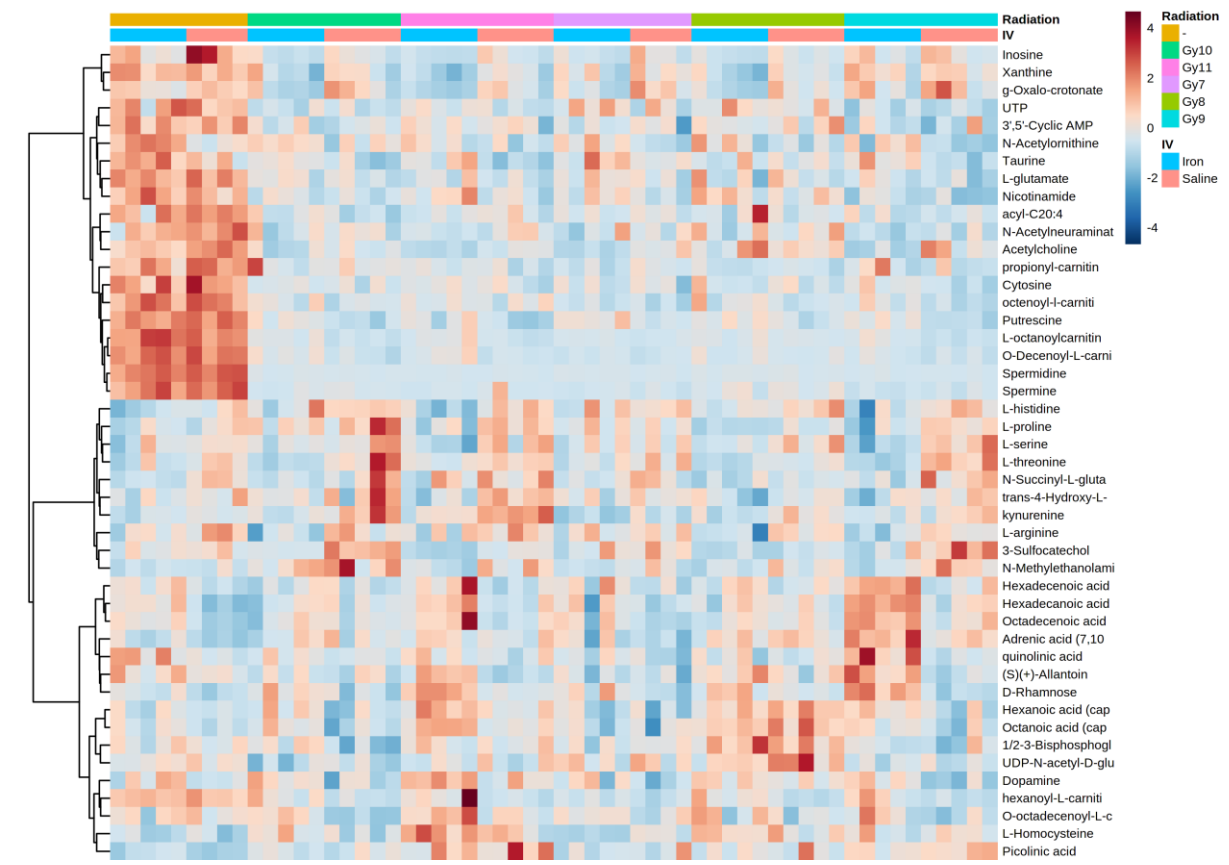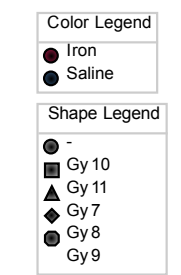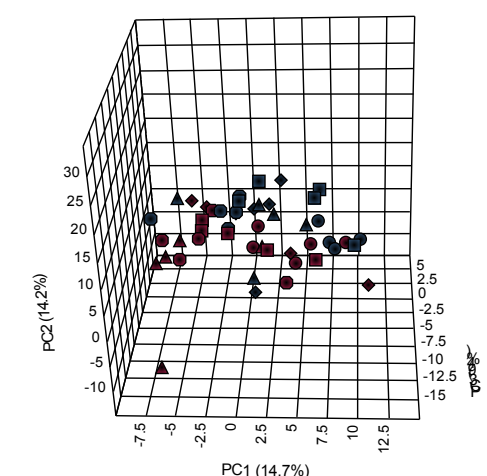

**Supp Fig 2.A** – Heat map (features significant by ANOVA), Principal Component Analysis, and Pathway Analysis of top metabolic effects for RBC metabolites in response to radiation with and without iron infusion.

# Glycolysis

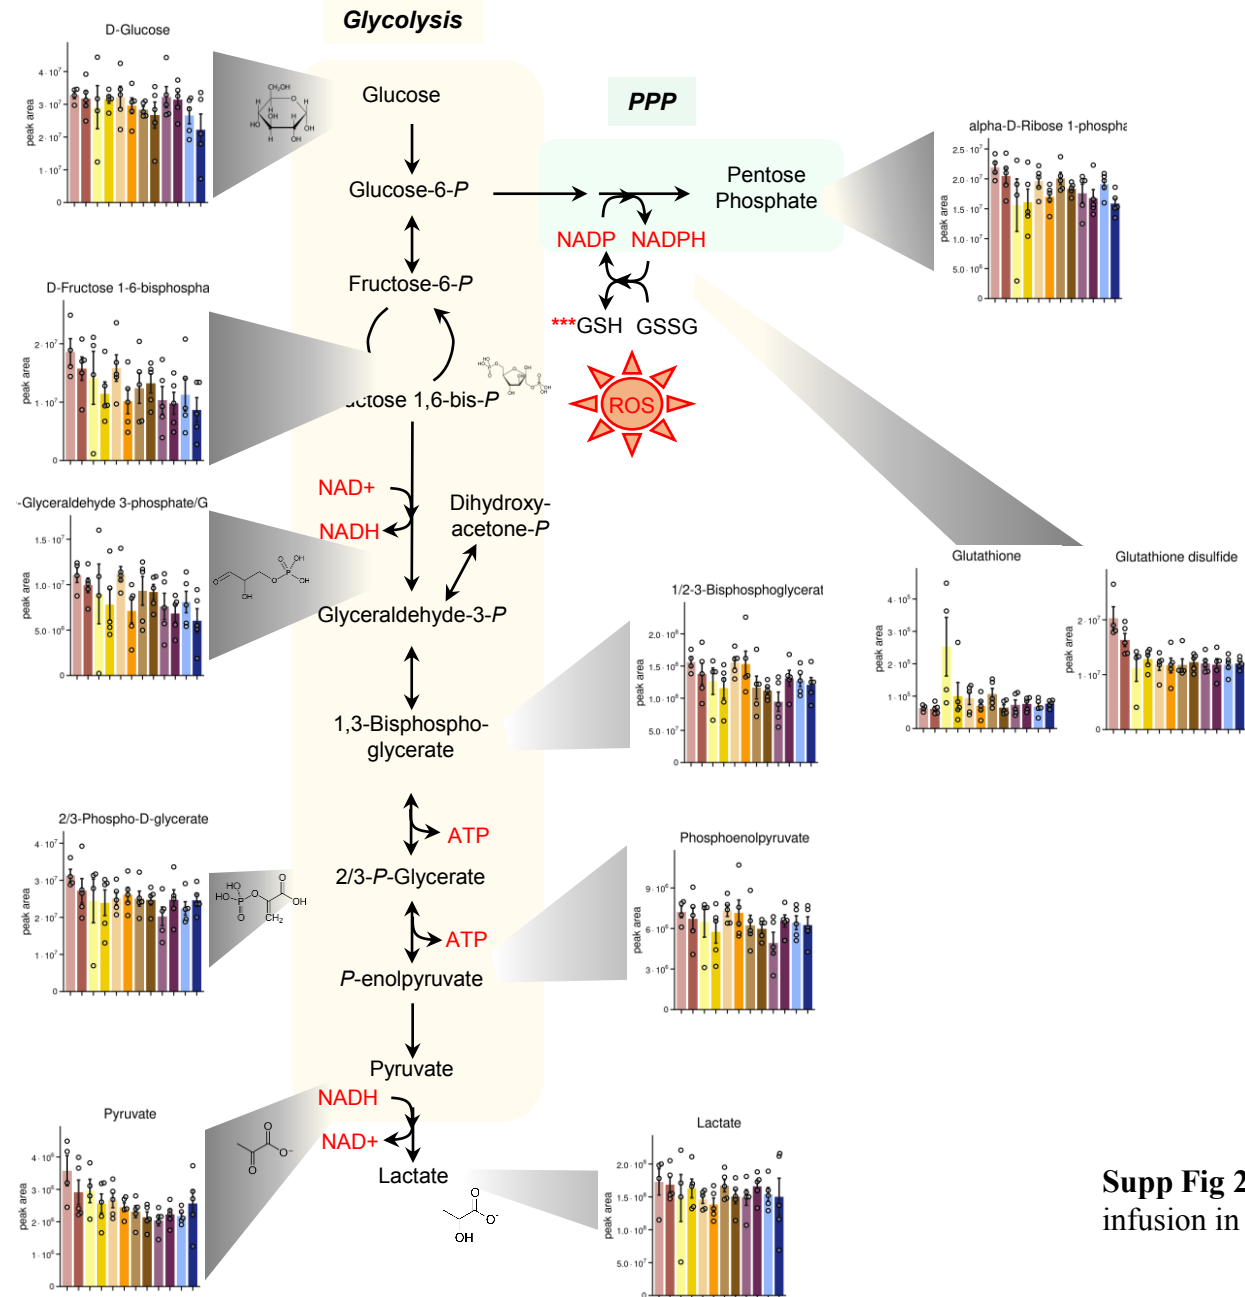

# RBC

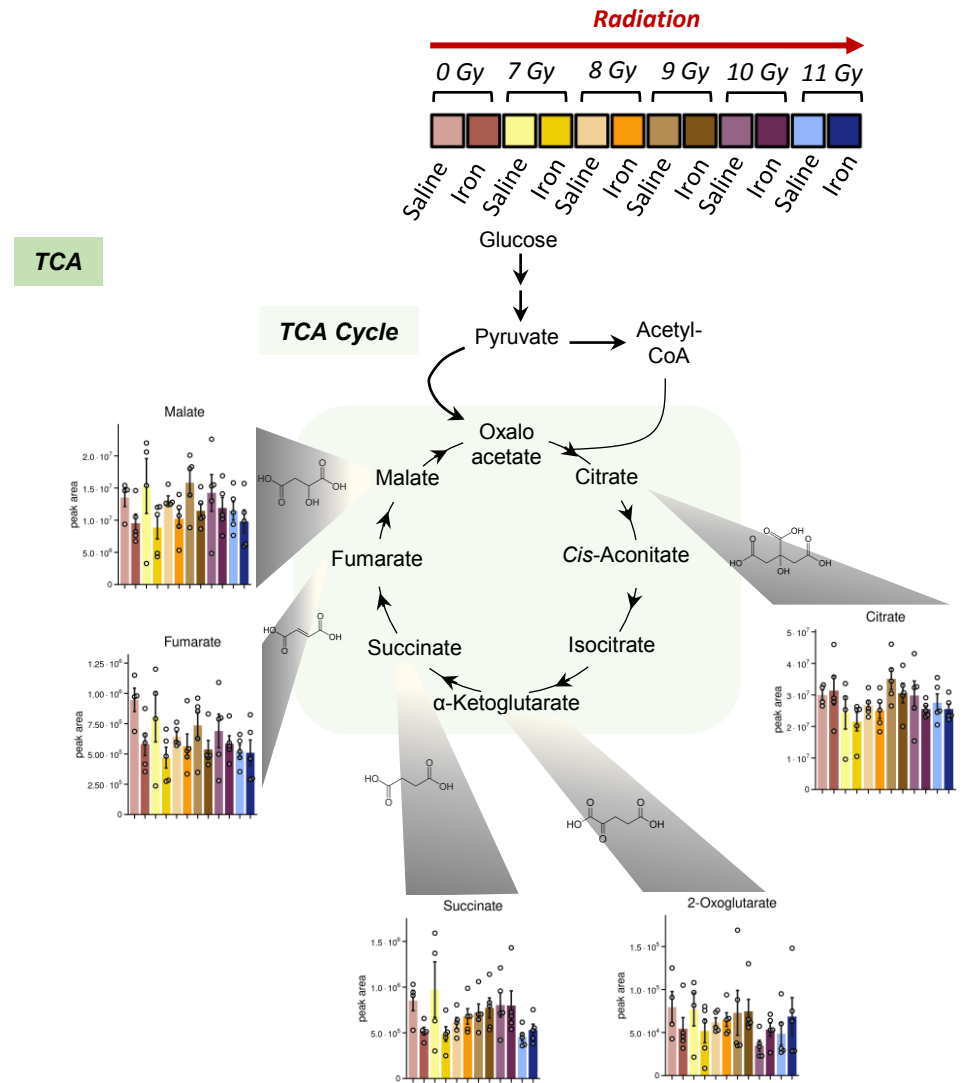

Supp Fig 2.B – Bar plots on the impact of radiation with and without iron infusion in the RBC TCA cycle and glycolysis pathway.





# PLASMA

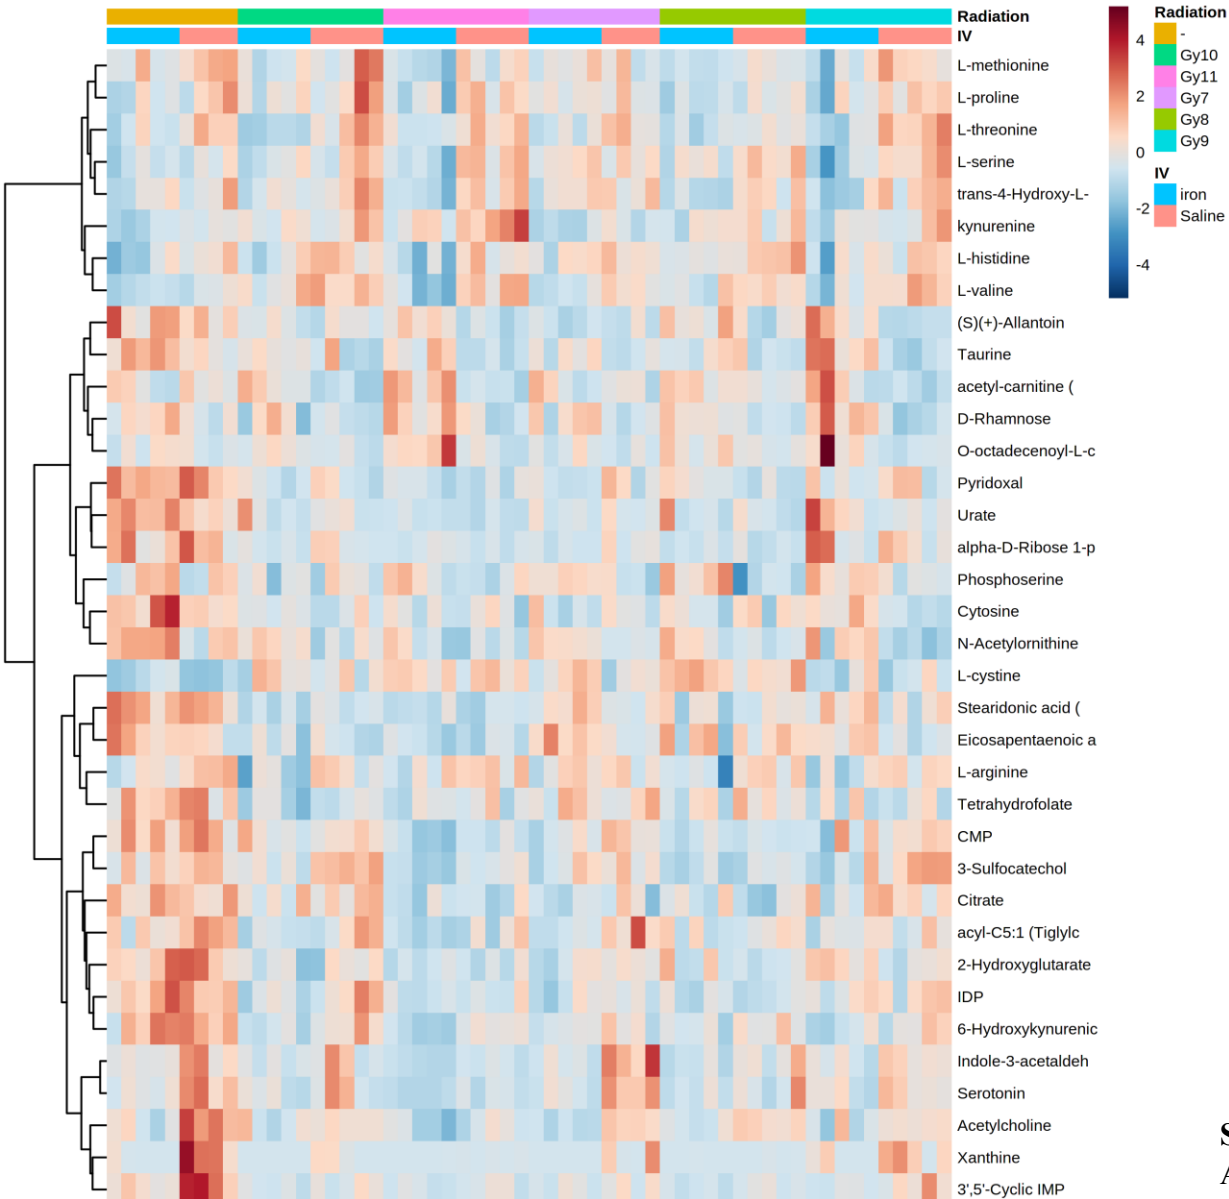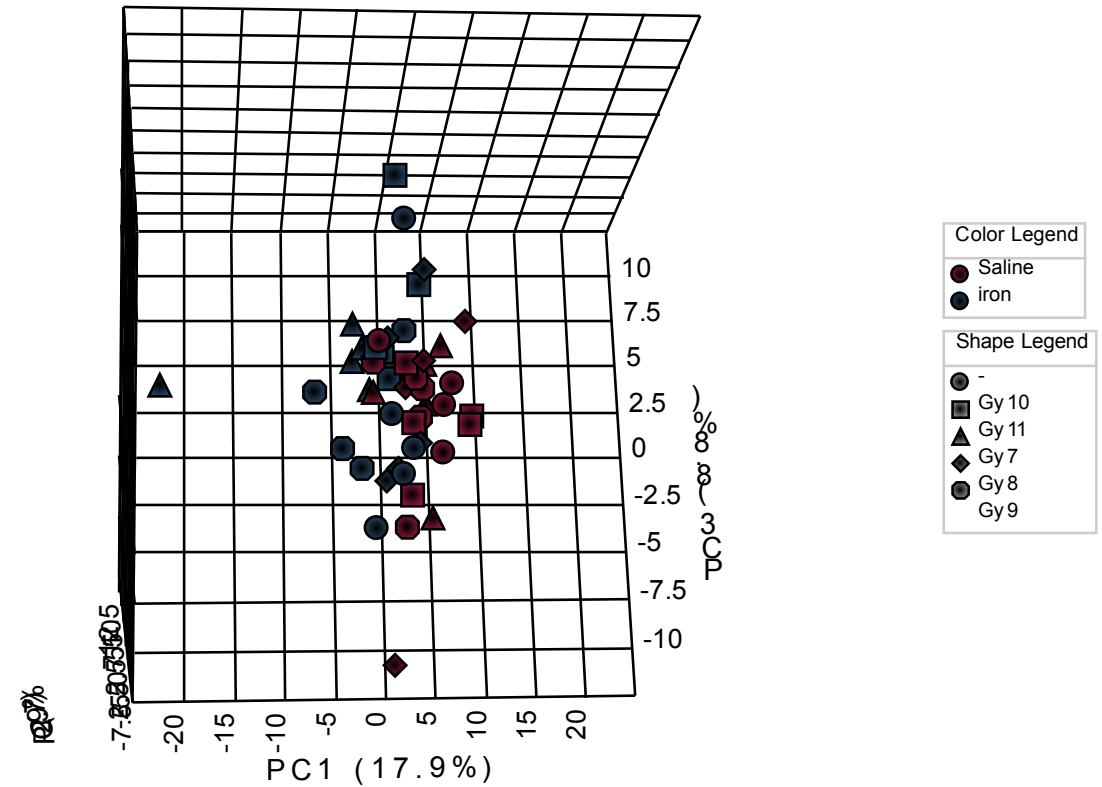

**Supp Fig 2.D** – Heat map (features significant by ANOVA) and Principal Component Analysis for plasma metabolites in response to radiation with and without iron infusion.

# Glycolysis

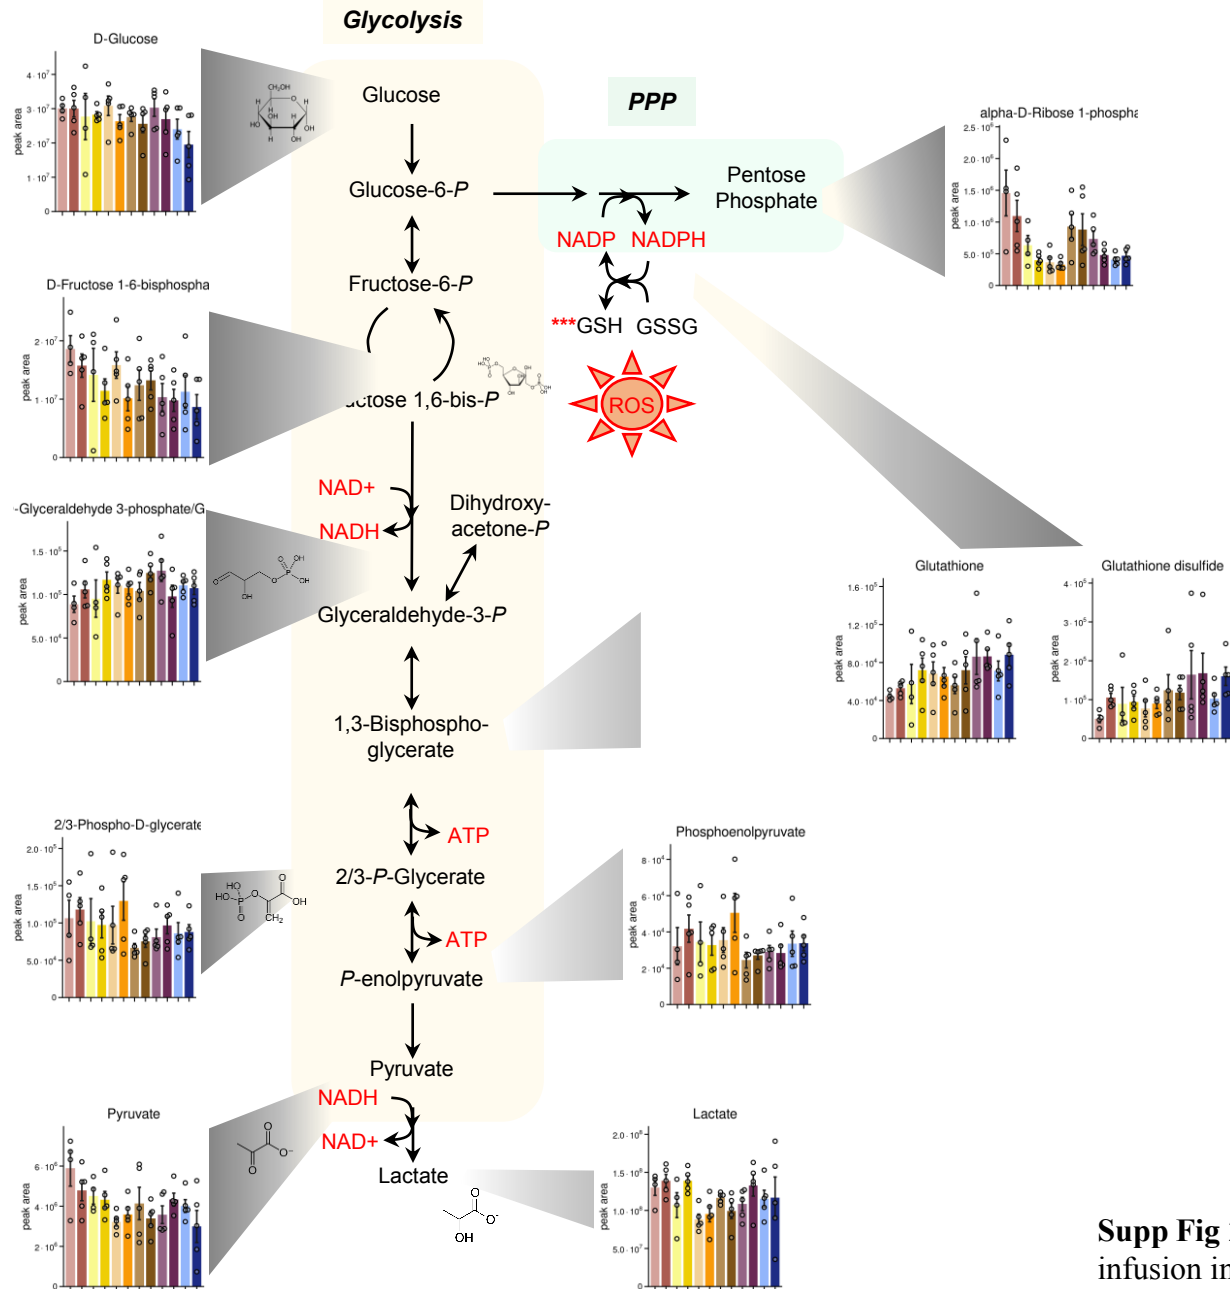

# Plasma

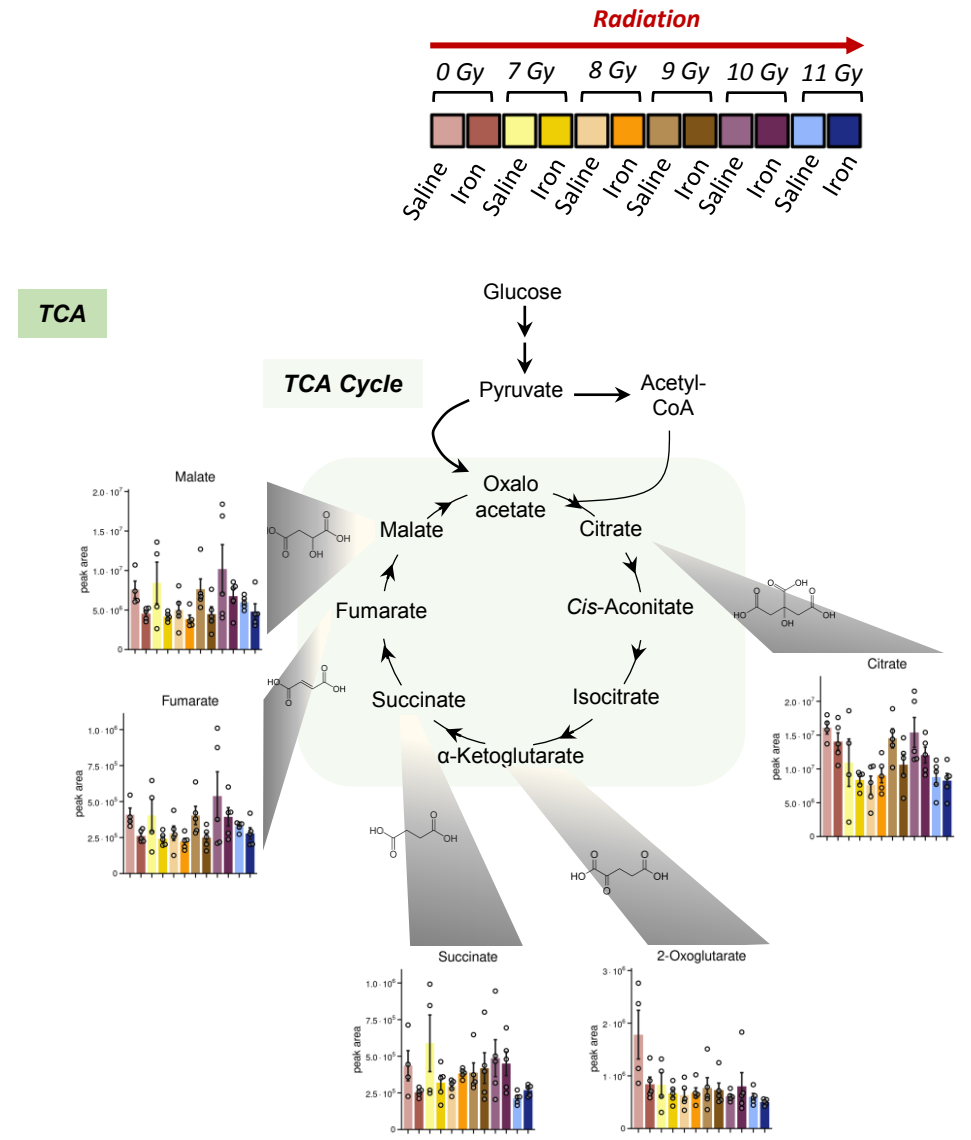

**Radiation**

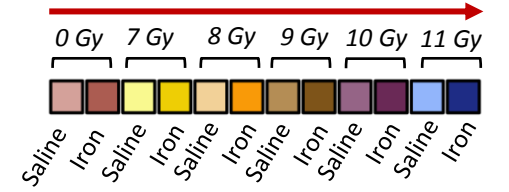

Supp Fig 2.E– Bar plots on the impact of radiation with and without iron infusion in the Plasma TCA cycle and glycolysis pathway.

**A**

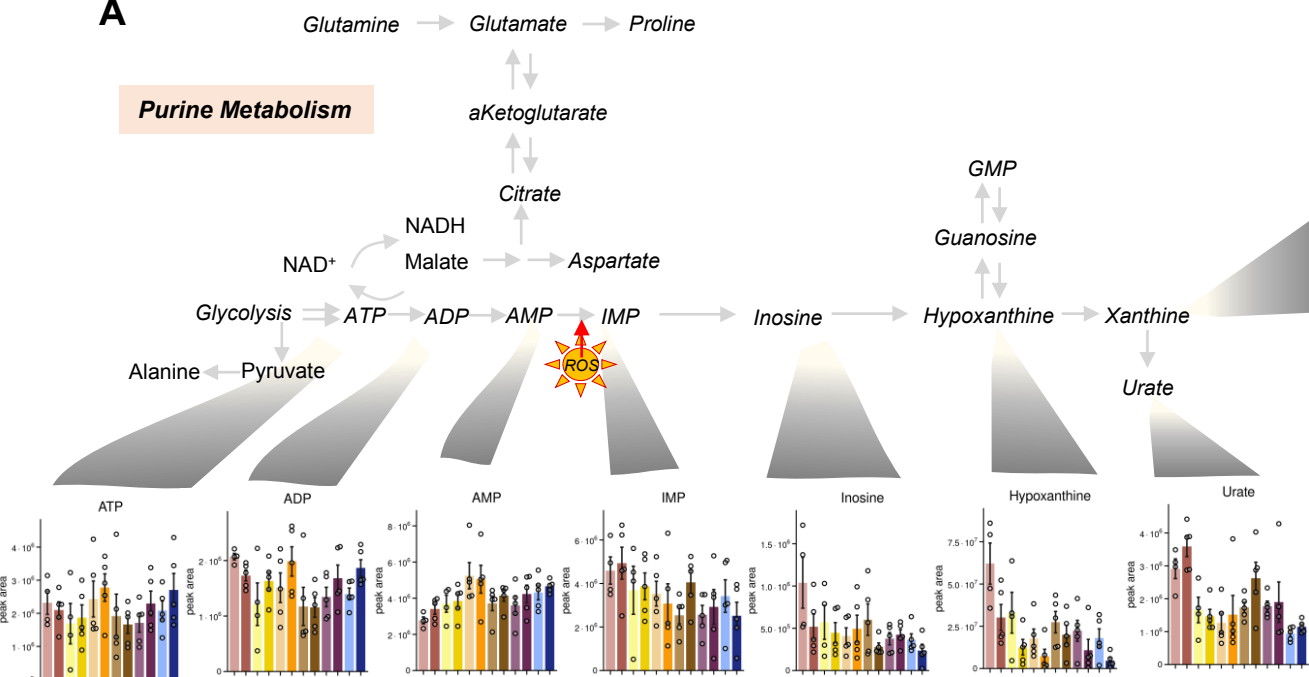

# PLASMA

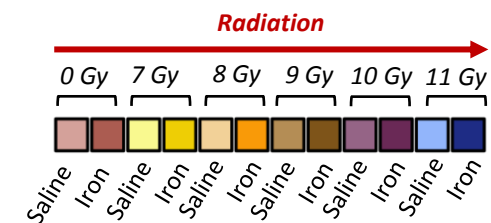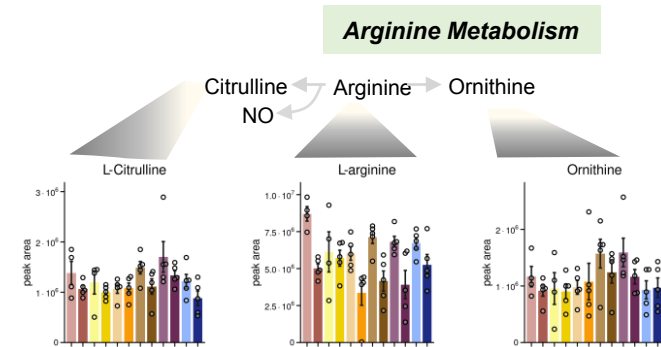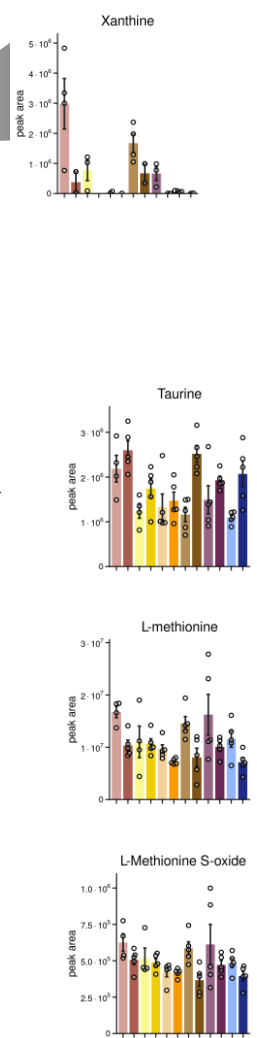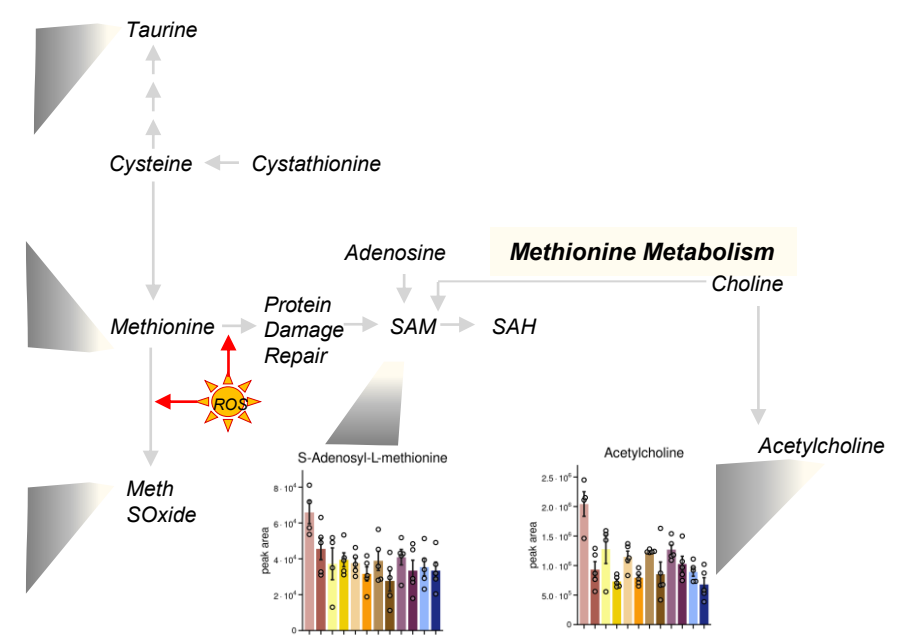

**Supp Fig 2.F**– Bar plots on the impact of radiation with and without iron infusion in plasma purine, arginine, and methionine metabolism.

# SPLEEN

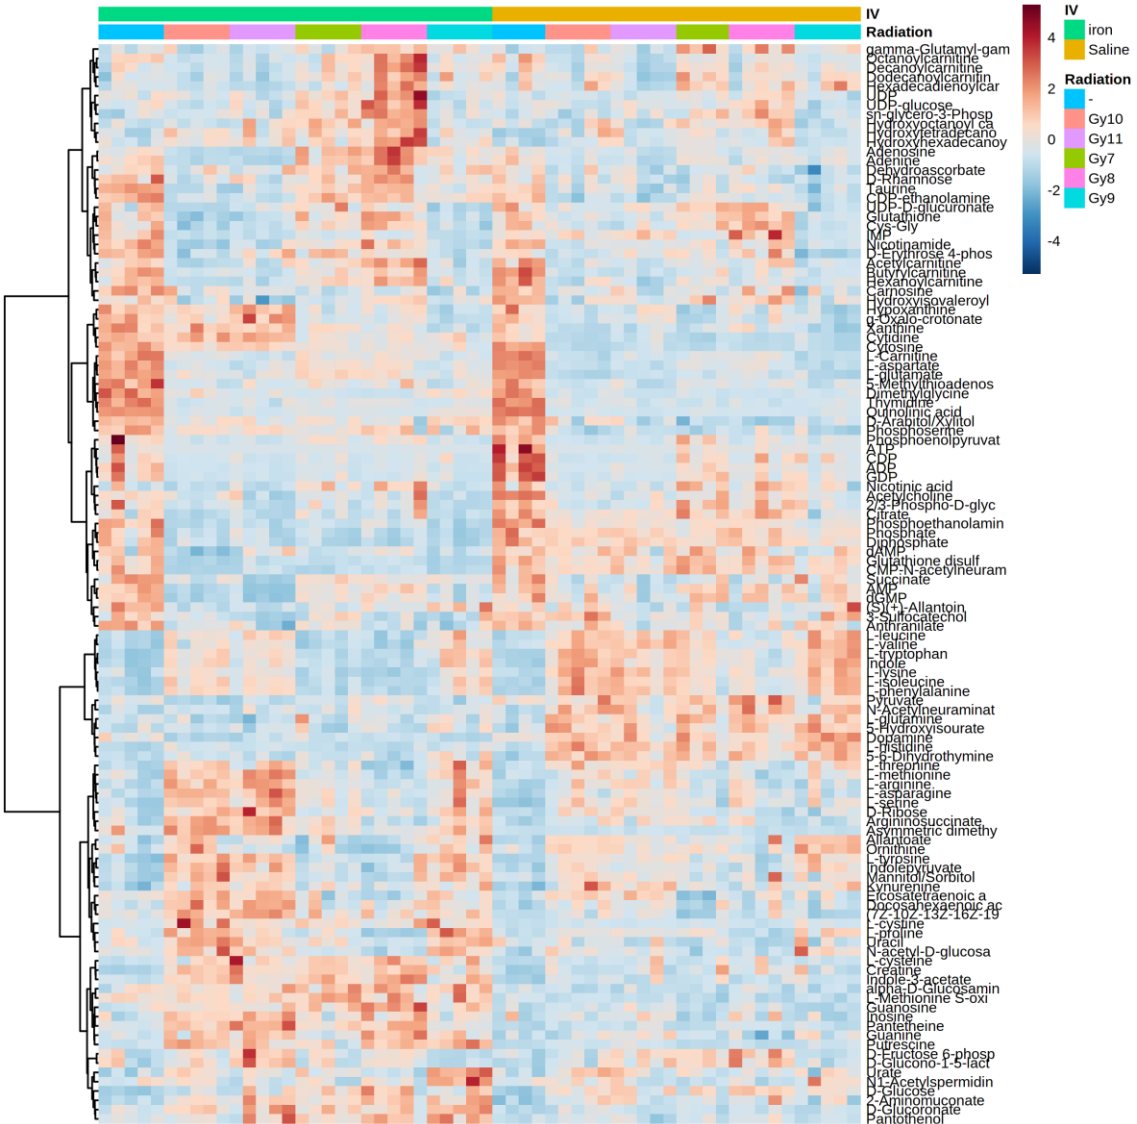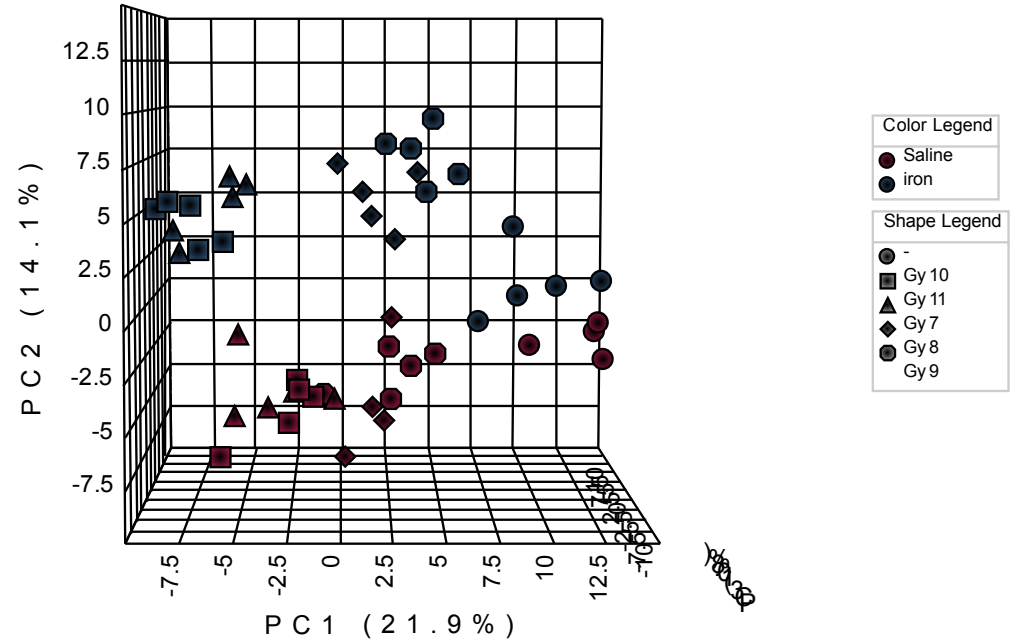

**Supp Fig 2.G** – Heat map (features significant by ANOVA) and Principal Component Analysis of top metabolic effects for spleen metabolites in response to radiation with and without iron infusion.

# Glycolysis

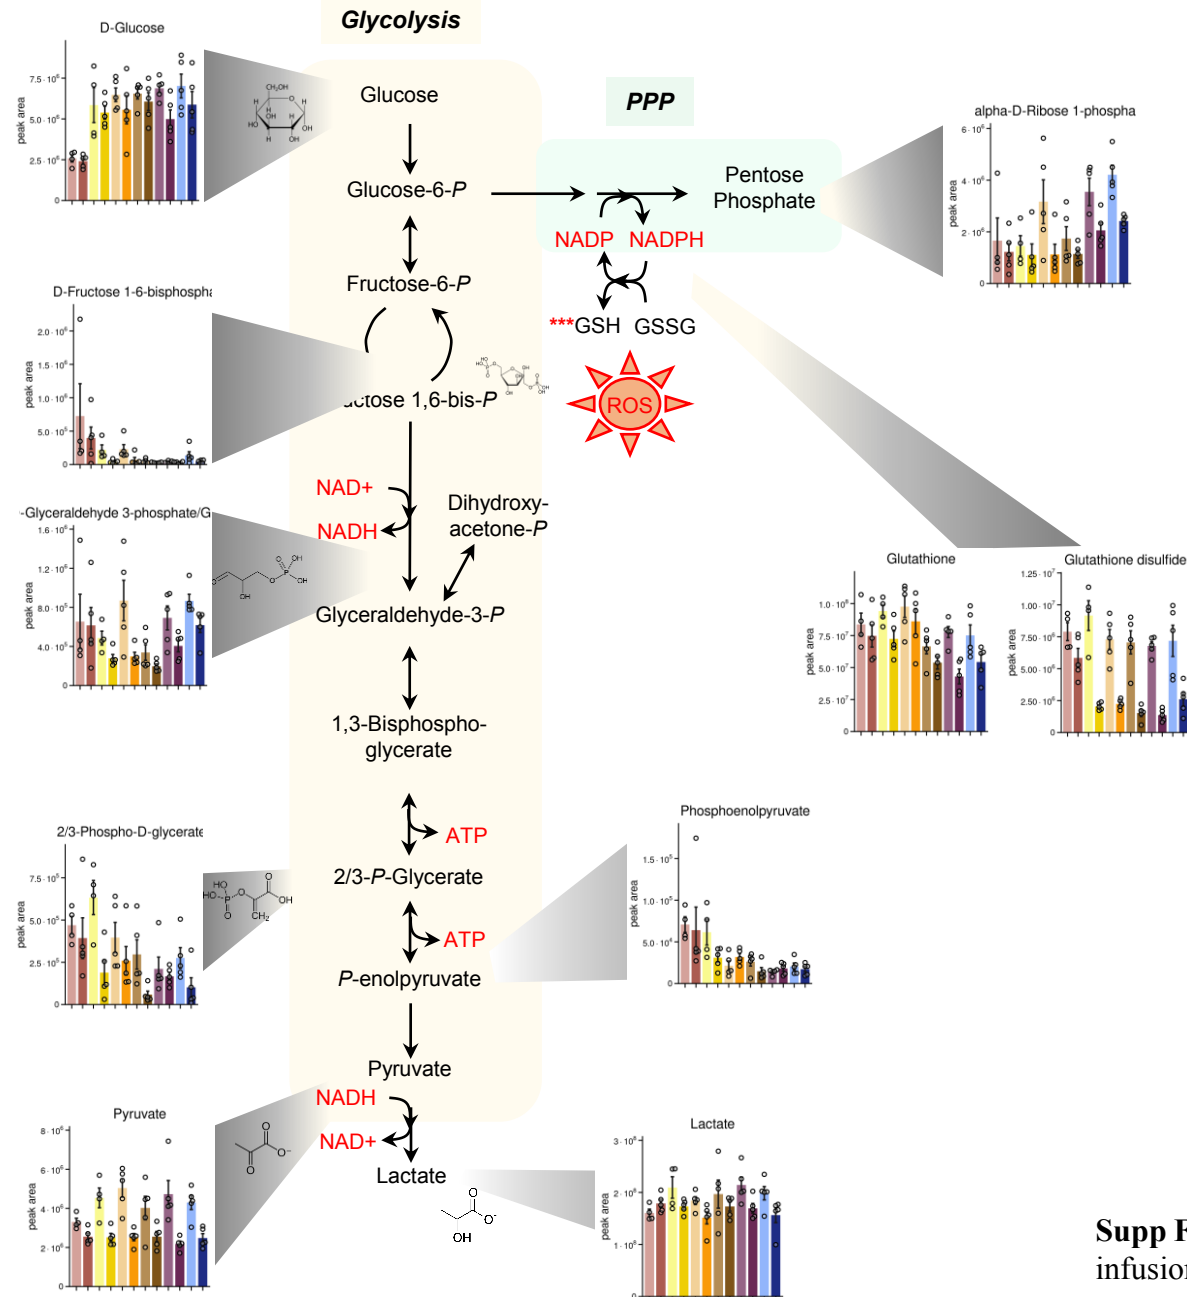

# SPLEEN

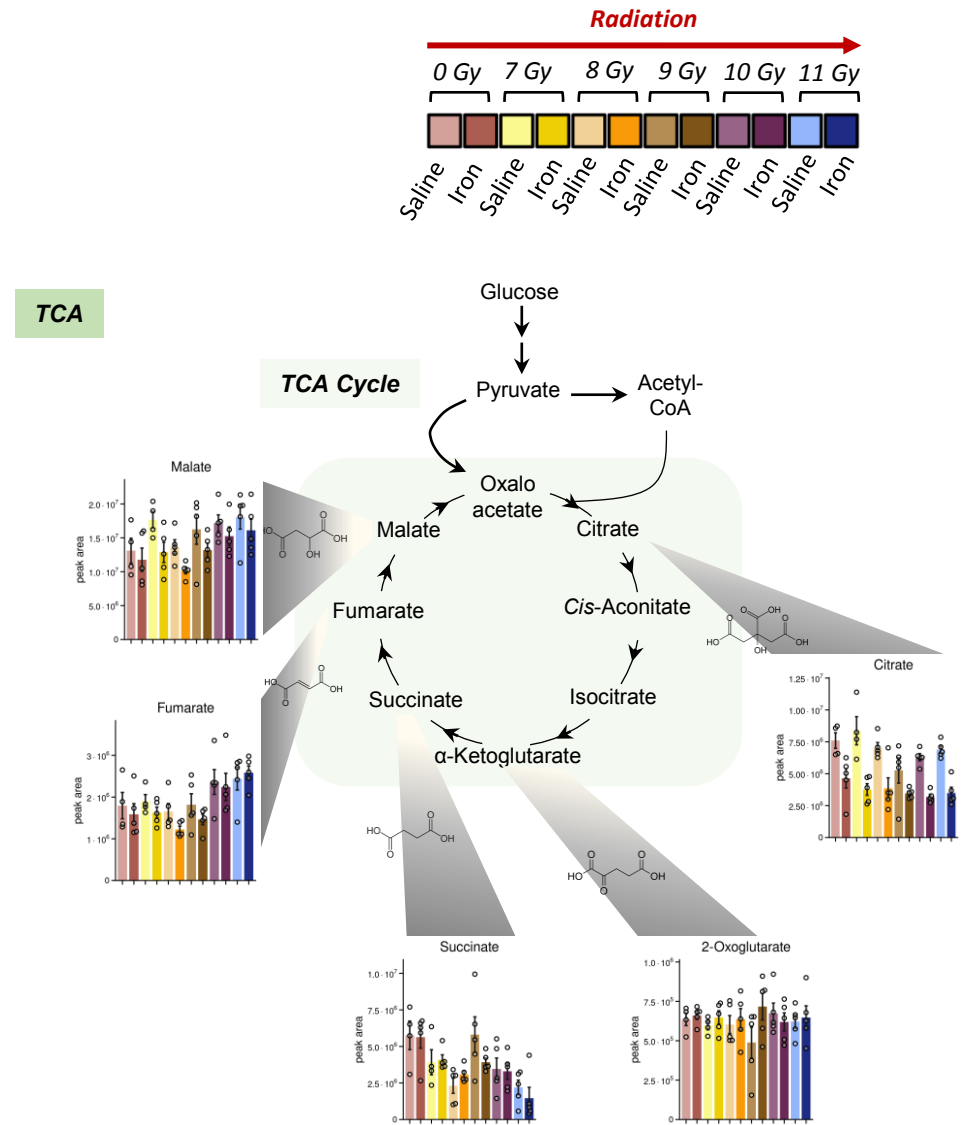

Supp Fig 2.H– Bar plots on the impact of radiation with and without iron infusion in the spleen TCA cycle and glycolysis pathway.

# SPLEEN

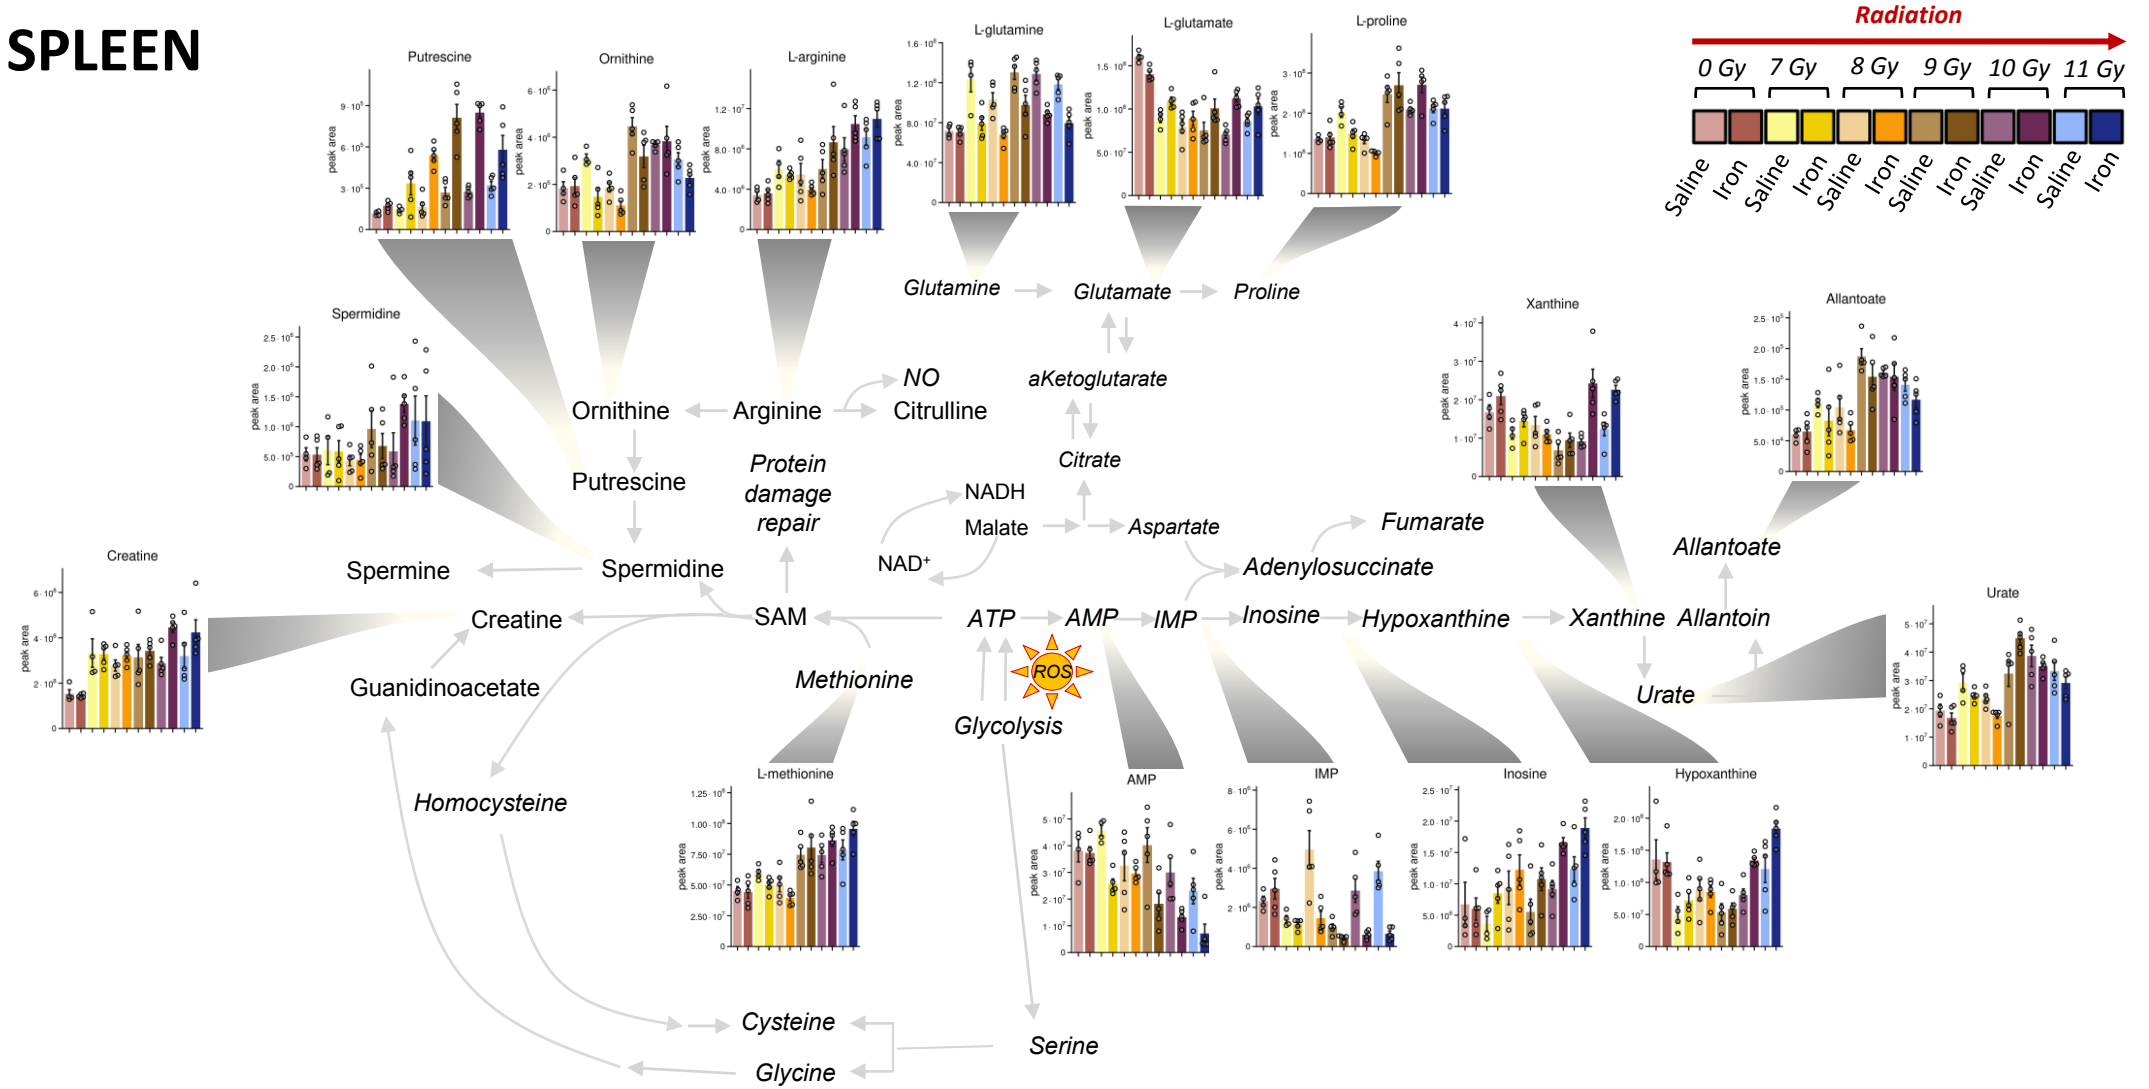

**Supp Fig 2.1** – Bar plots on the impact of radiation with and without iron infusion in the spleen protein damage and repair pathways.

# LIVER

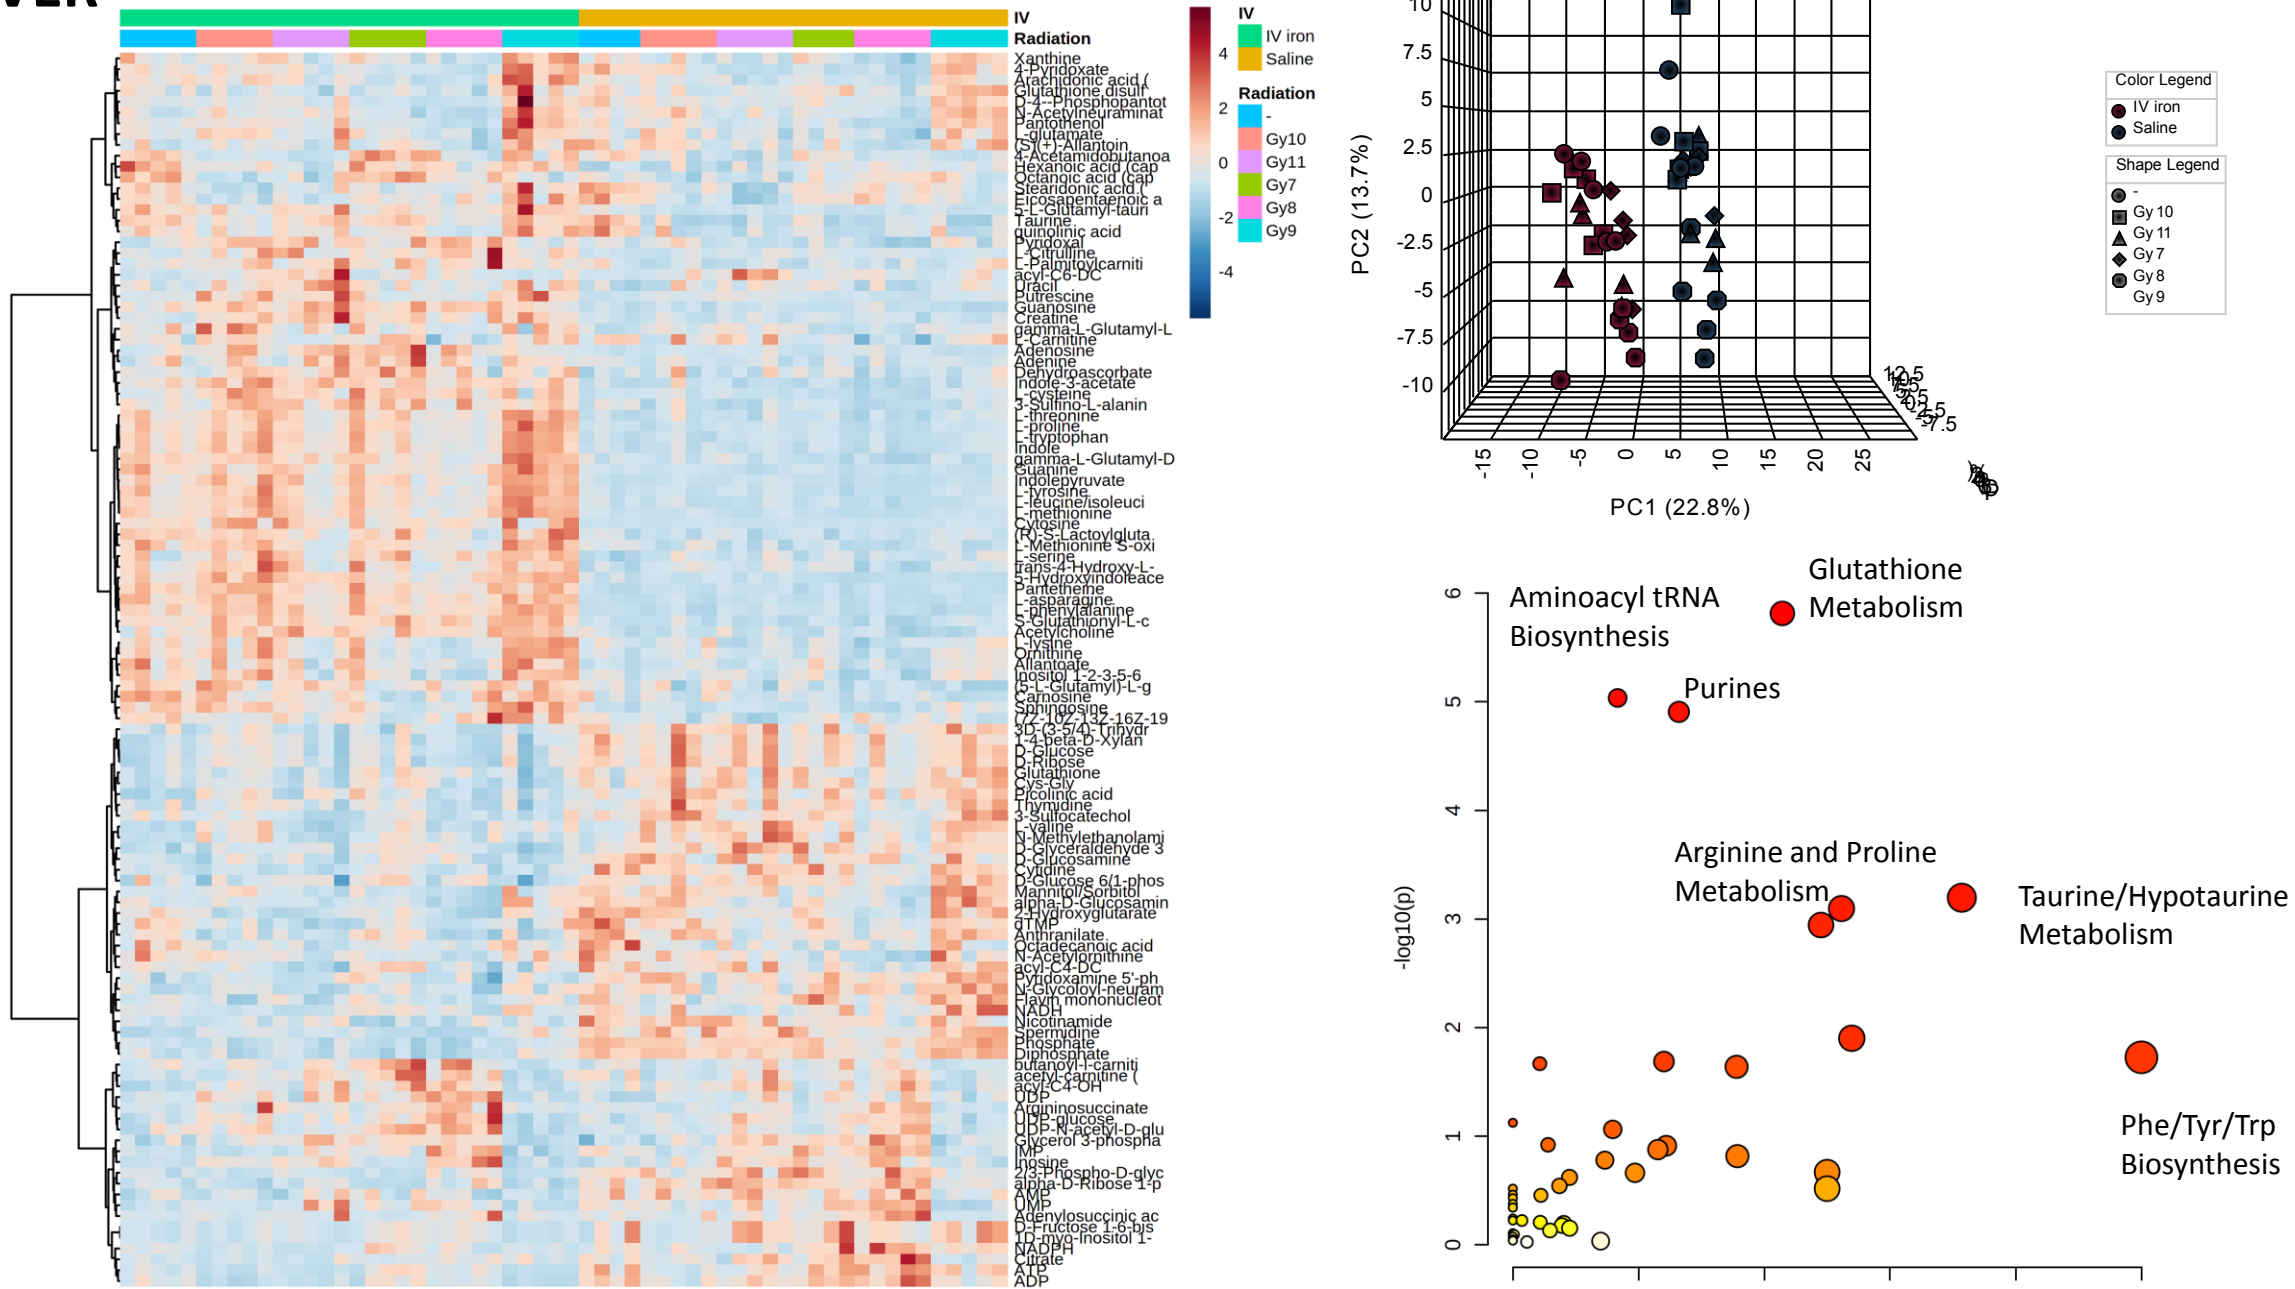

**Supp Fig 2.J** – Heat map (features significant by ANOVA), Principal Component Analysis, and Pathway Analysis of top metabolic effects for liver metabolites in response to radiation with and without iron infusion.



# LIVER

## Glycolysis

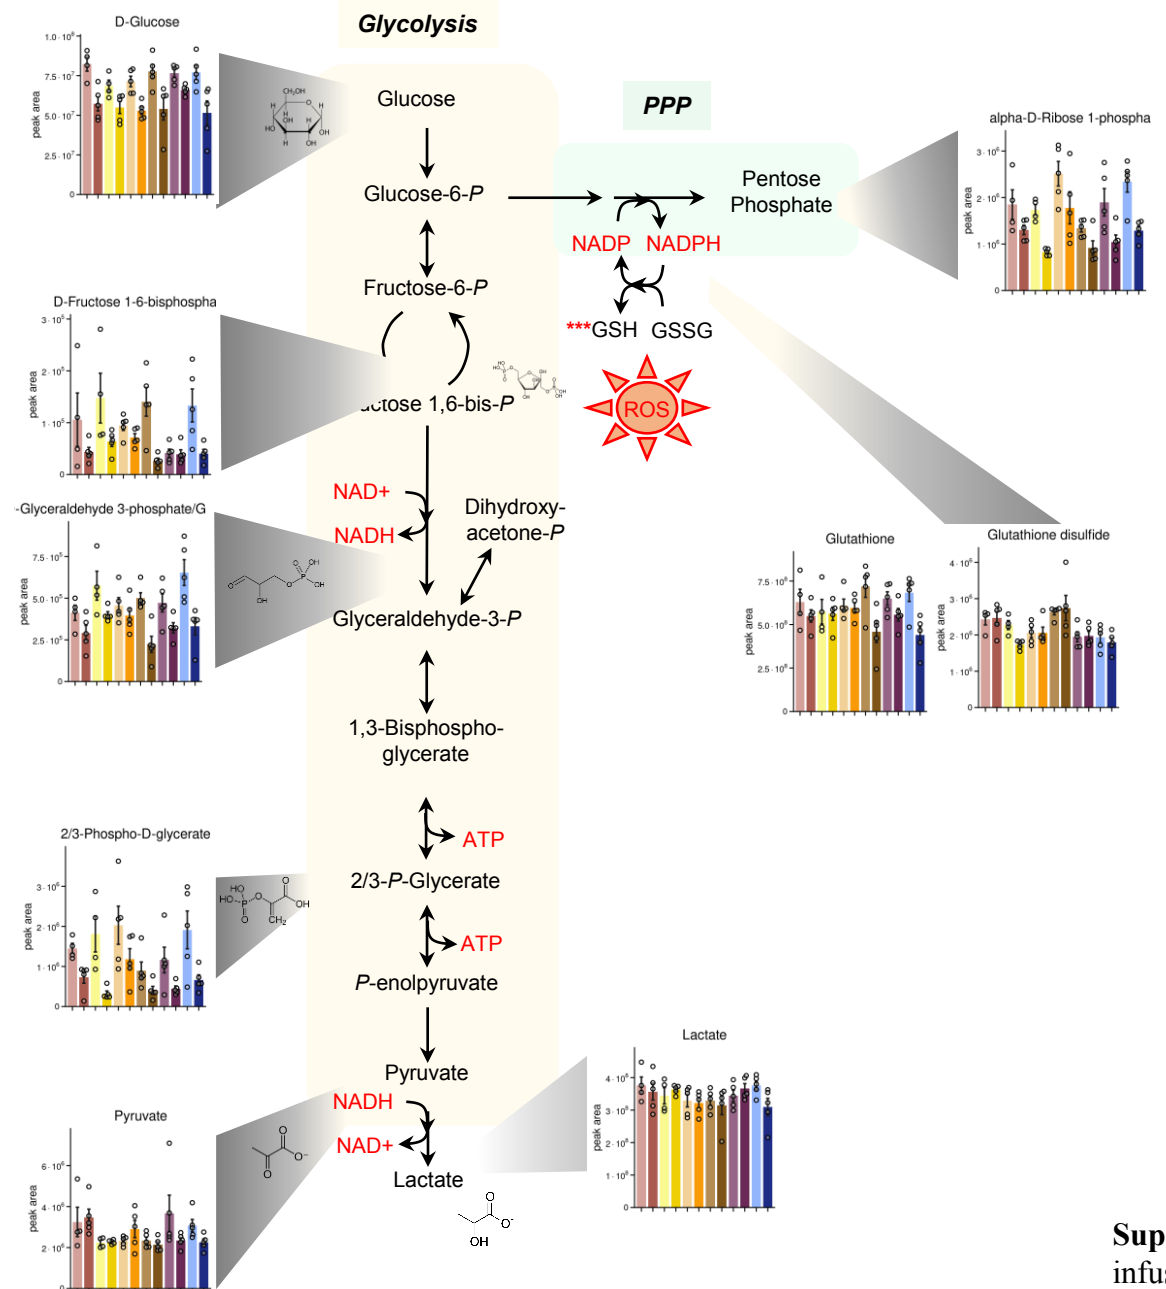

## Radiation

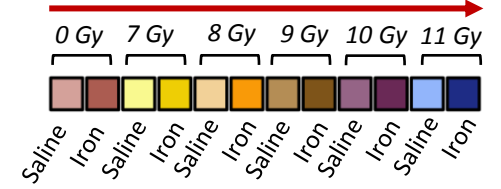

## TCA

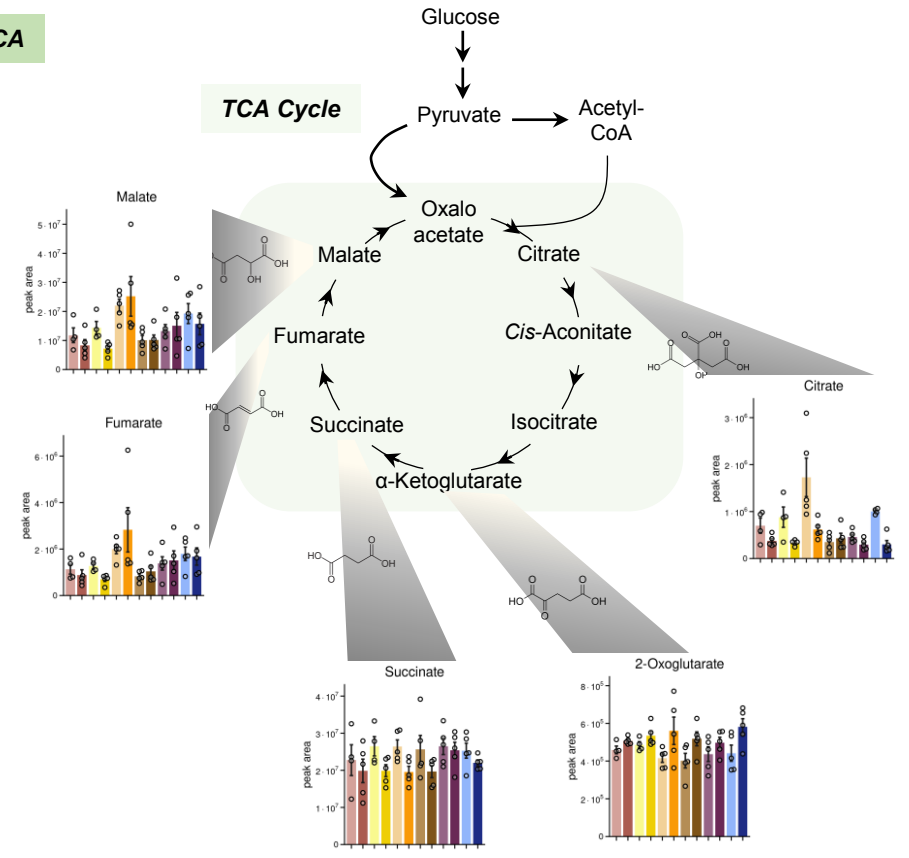

Supp Fig 2.K– Bar plots on the impact of radiation with and without iron infusion in the liver TCA cycle and glycolysis pathway.

# LIVER

## Methionine Metabolism

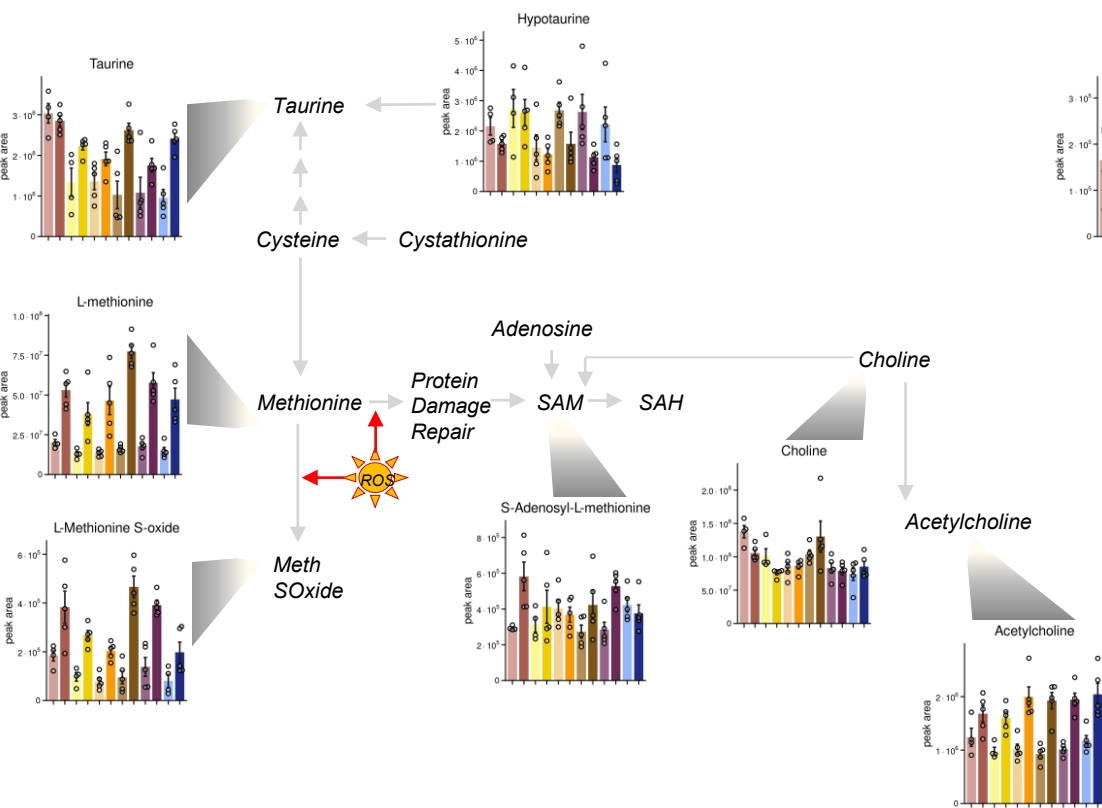

## Purine Metabolism

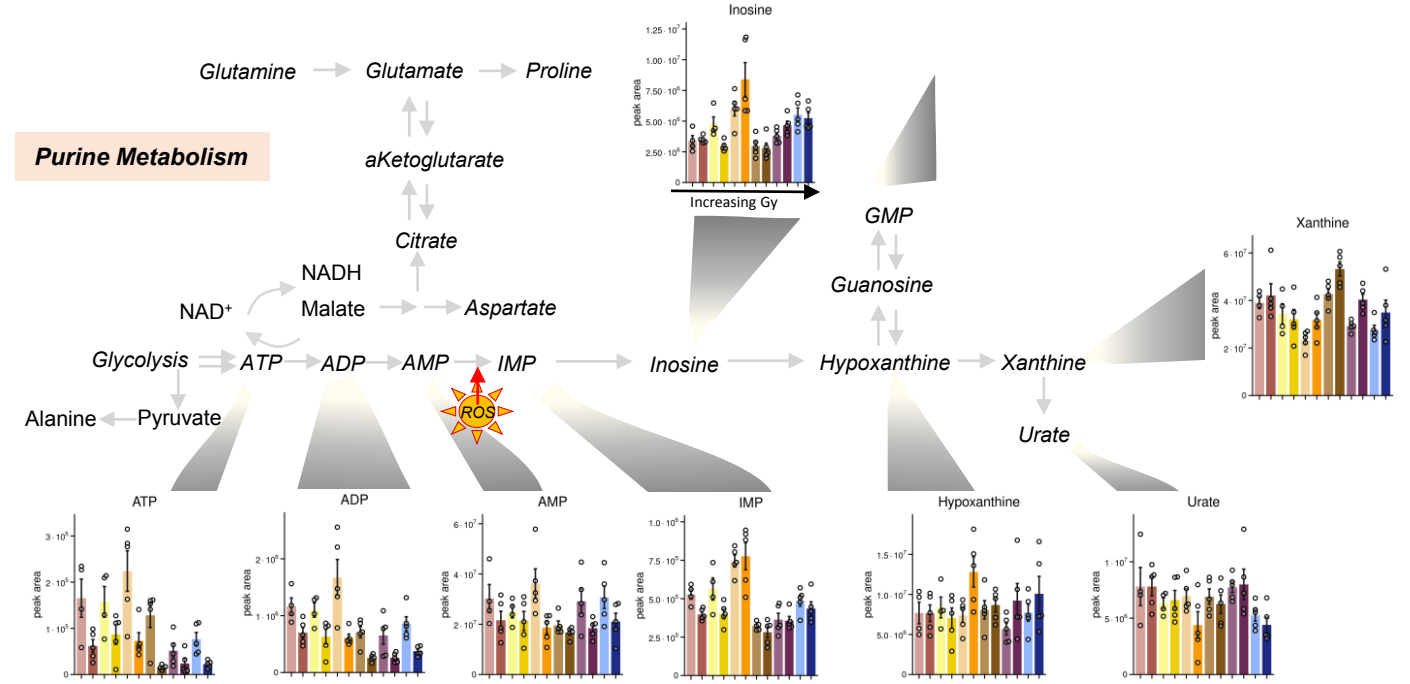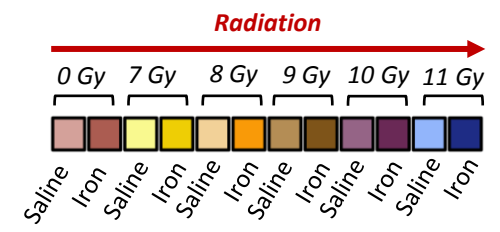

Supp Fig 2.L– Bar plots on the impact of radiation with and without iron infusion in liver purine and methionine metabolism.

# KIDNEY

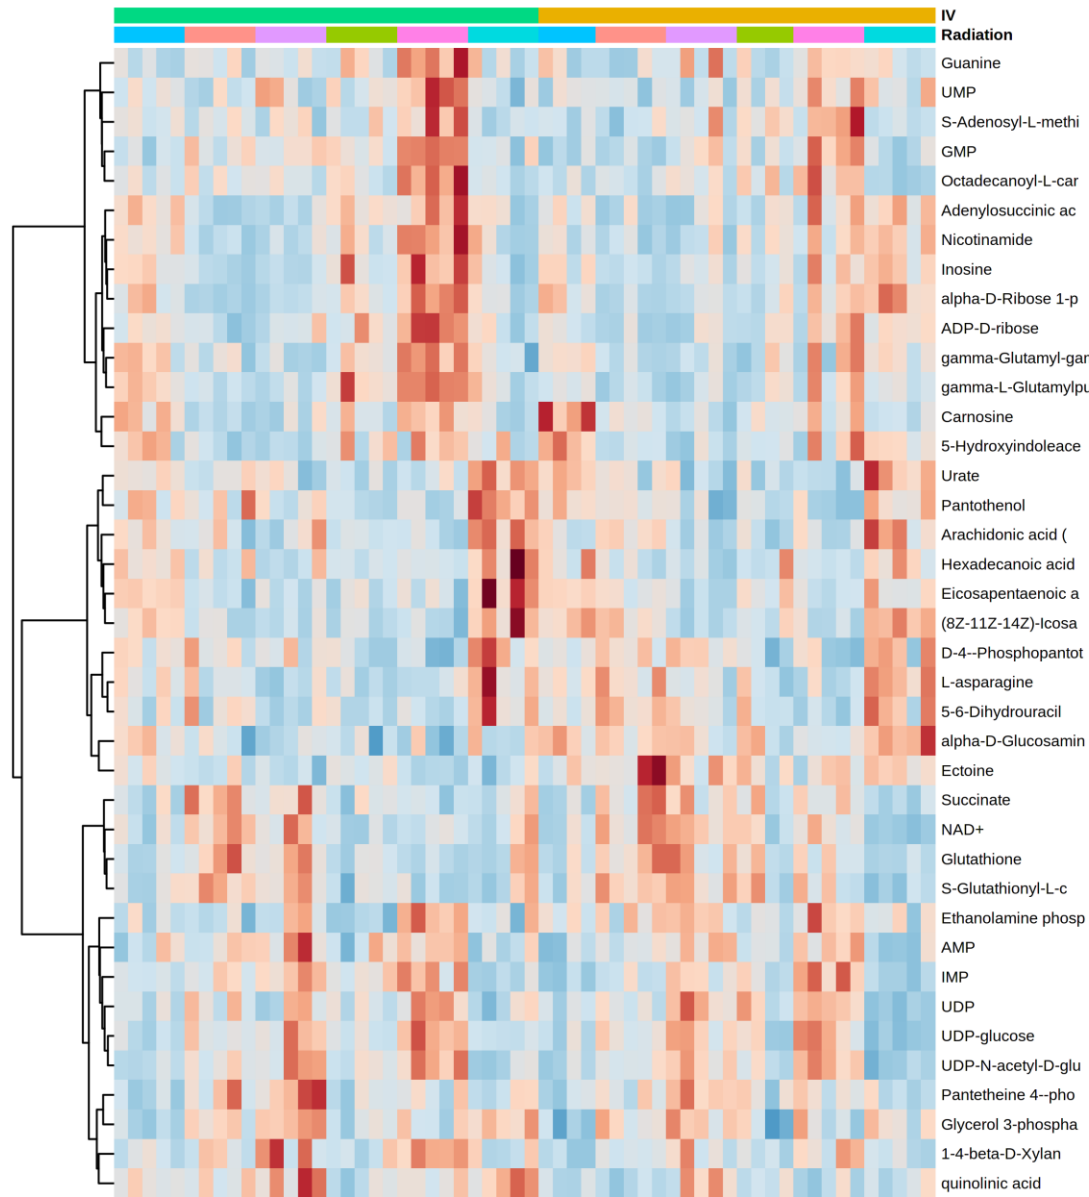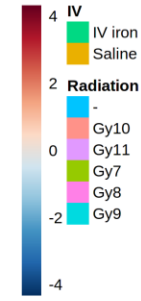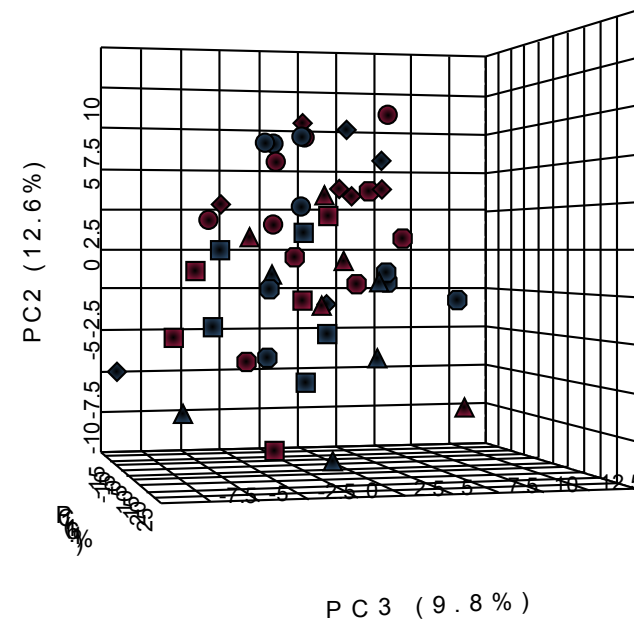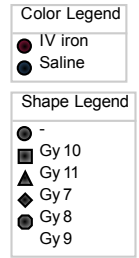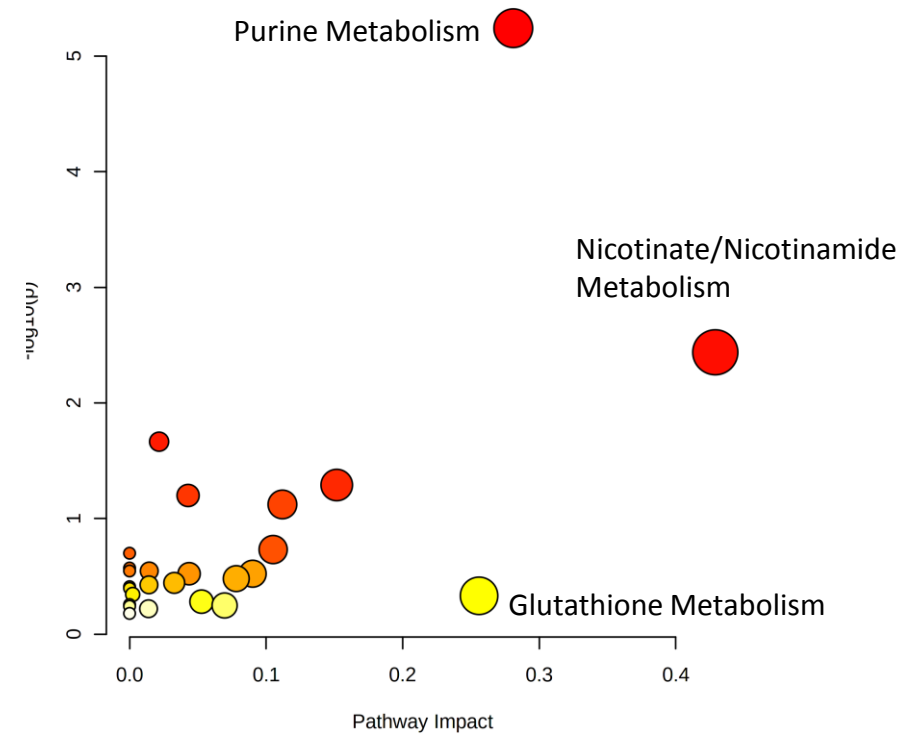

**Supp Fig 2.M** – Heat map (features significant by ANOVA), Principal Component Analysis, and Pathway Analysis of top metabolic effects for kidney metabolites in response to radiation with and without iron infusion.



# KIDNEY

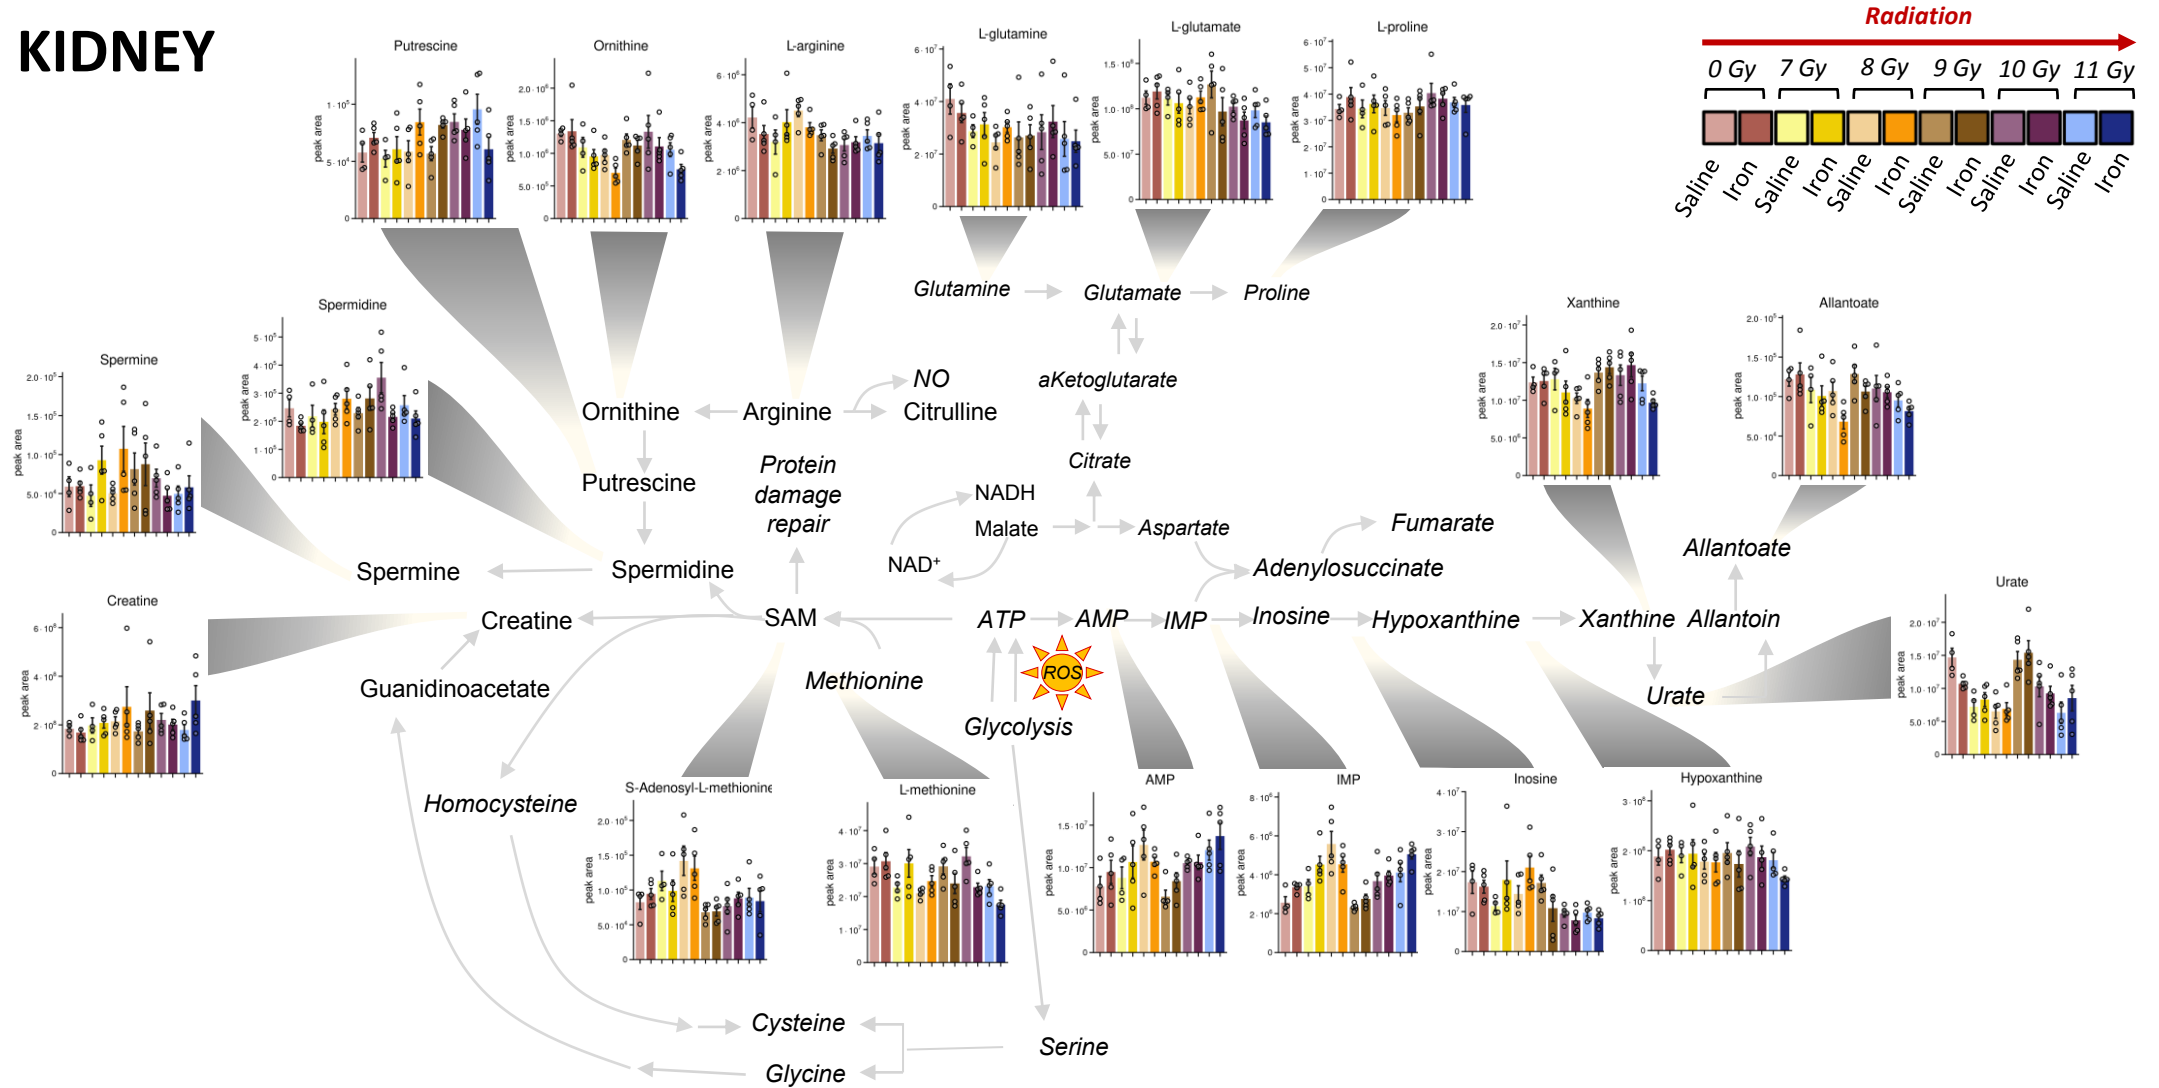

**Supp Fig 2.0** – Bar plots on the impact of radiation with and without iron infusion in the kidney protein damage and repair pathways.

# HEART

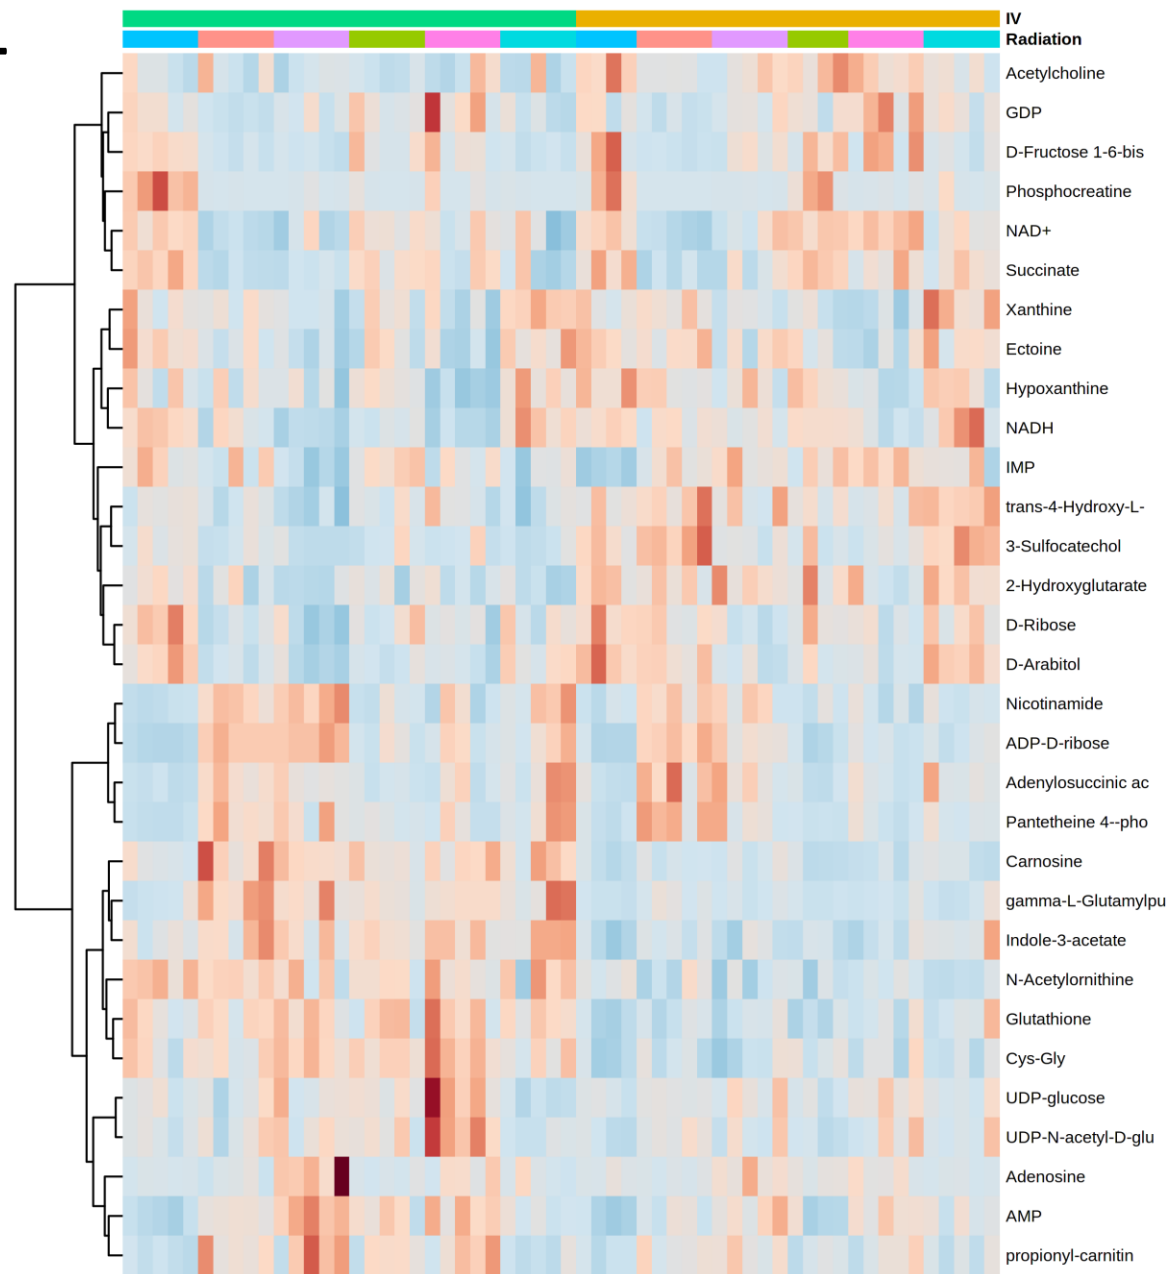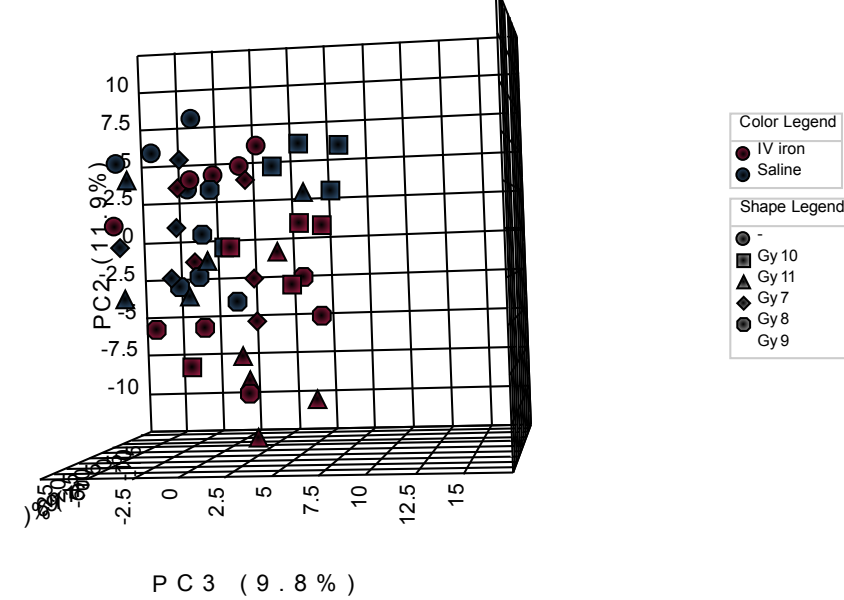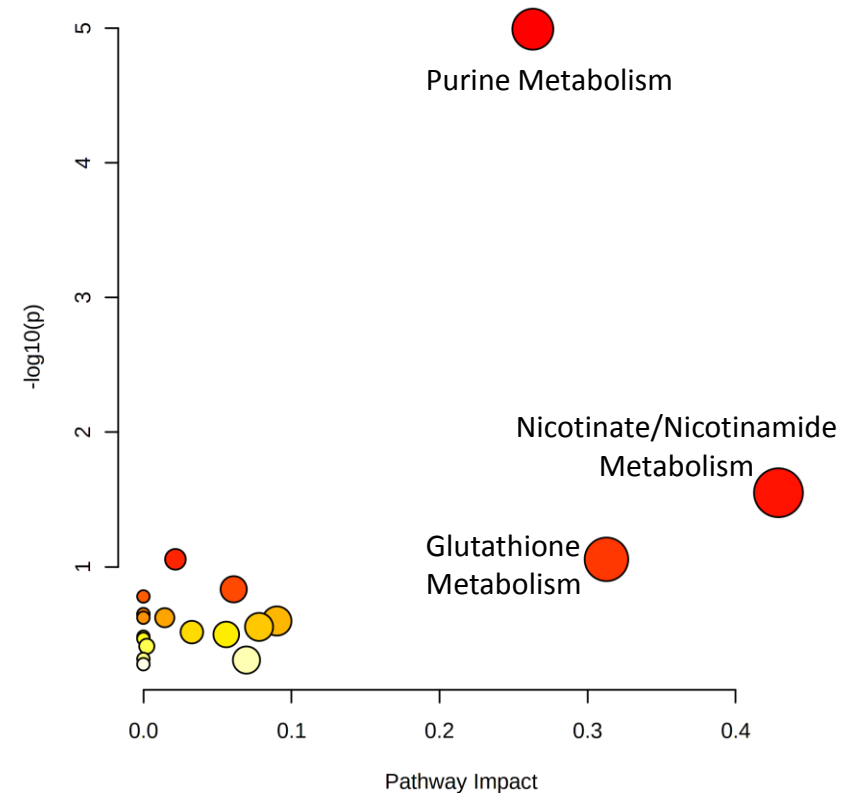

**Supp Fig 2.P** – Heat map (features significant by ANOVA), Principal Component Analysis, and Pathway Analysis of top metabolic effects for heart metabolites in response to radiation with and without iron infusion.

# HEART

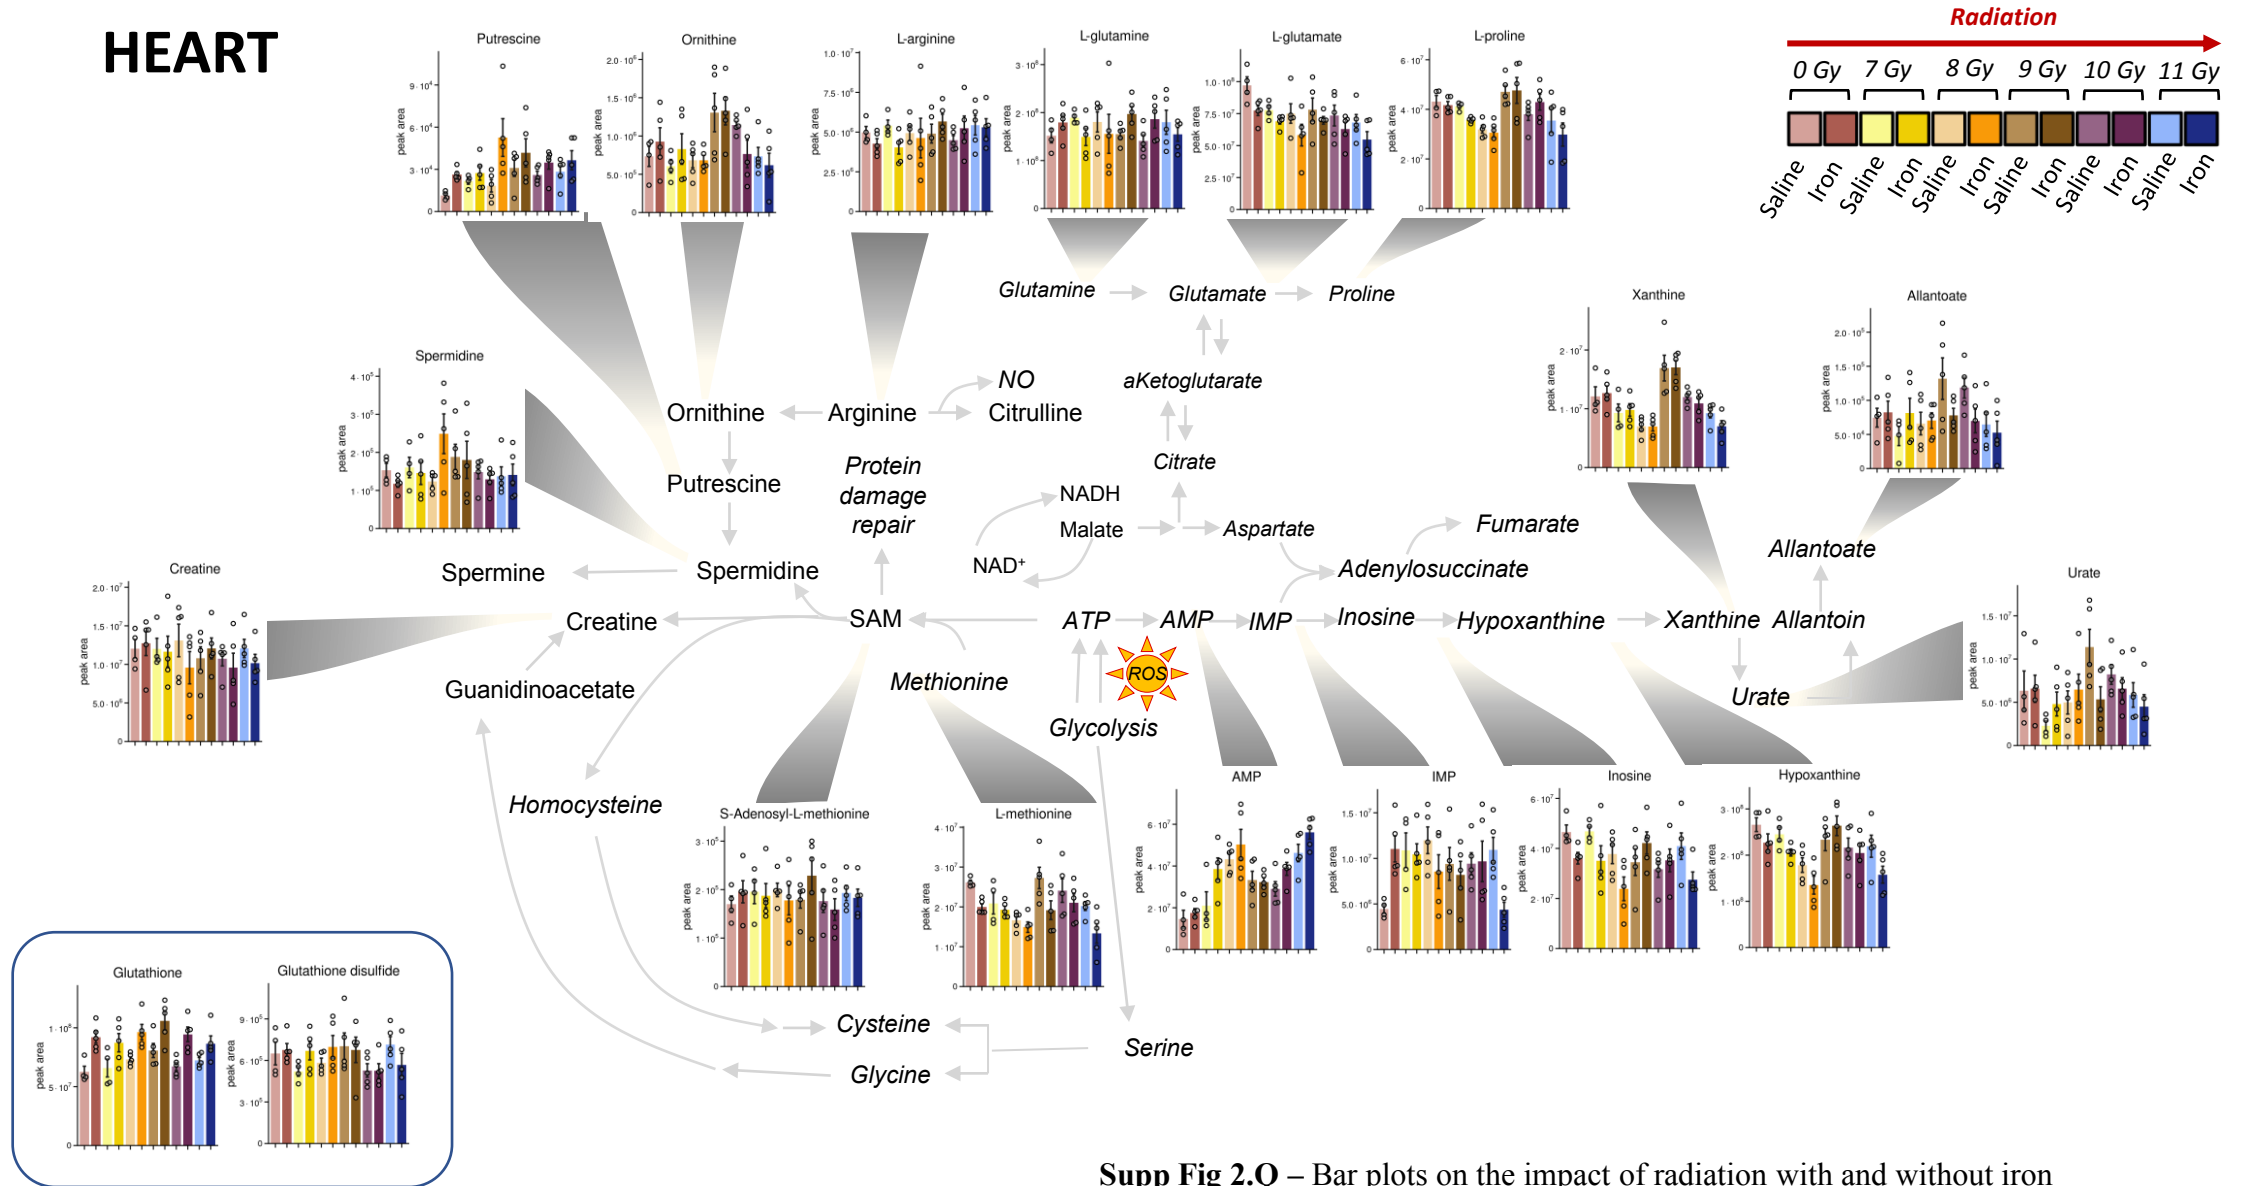

Supp Fig 2.Q – Bar plots on the impact of radiation with and without iron infusion in the heart protein damage and repair pathways.

# COLON

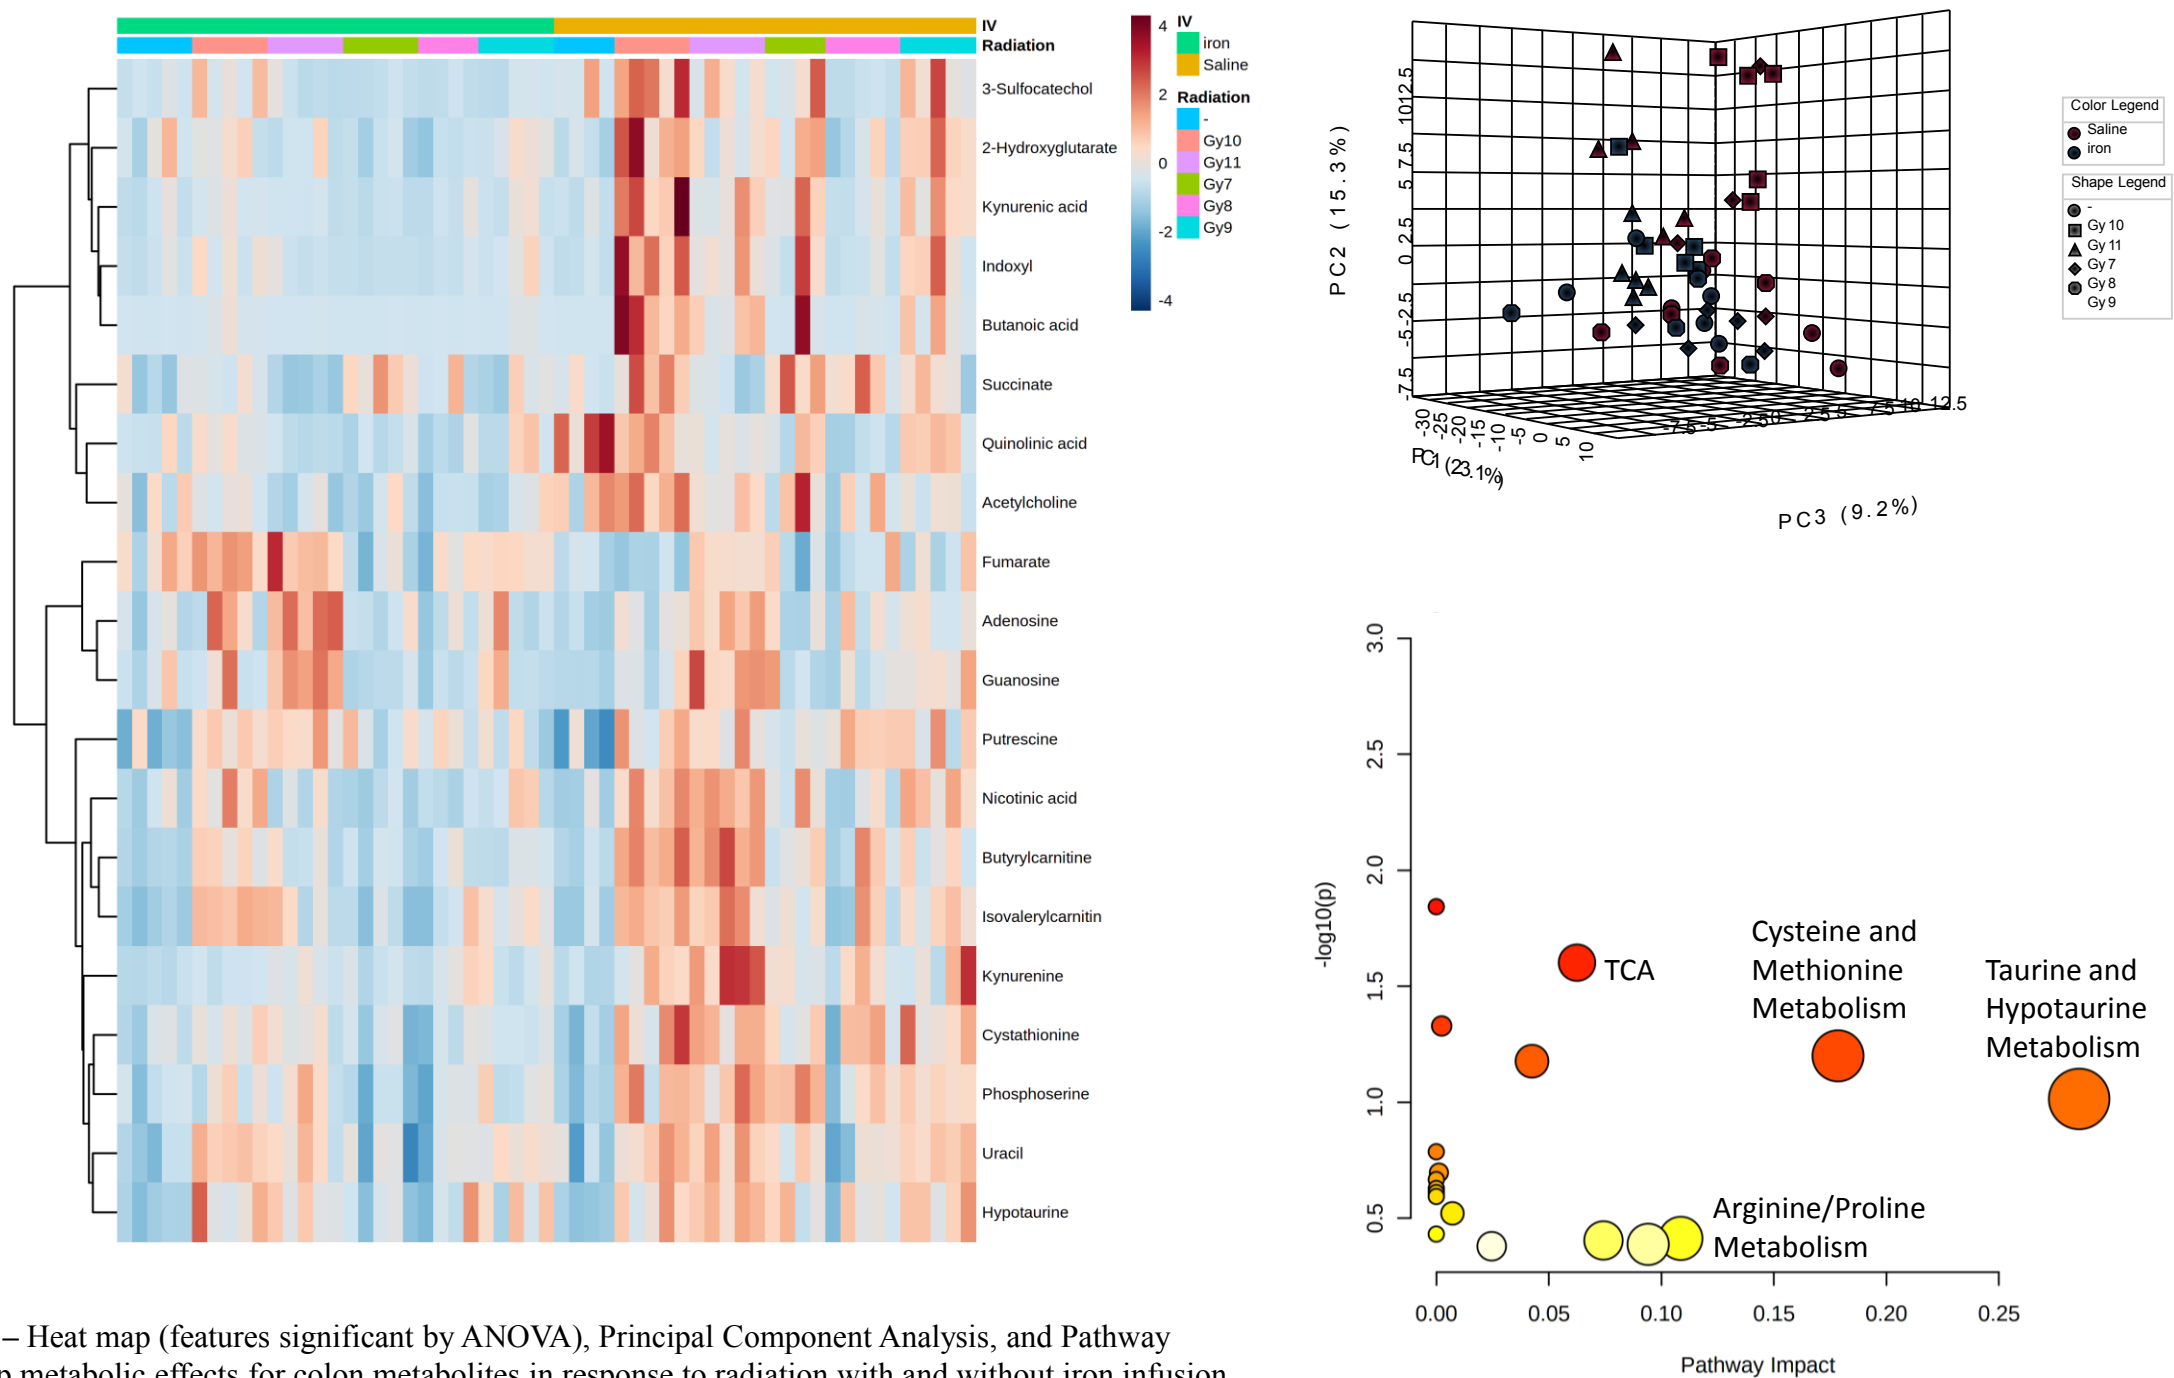

**Supp Fig 2.R** – Heat map (features significant by ANOVA), Principal Component Analysis, and Pathway Analysis of top metabolic effects for colon metabolites in response to radiation with and without iron infusion.



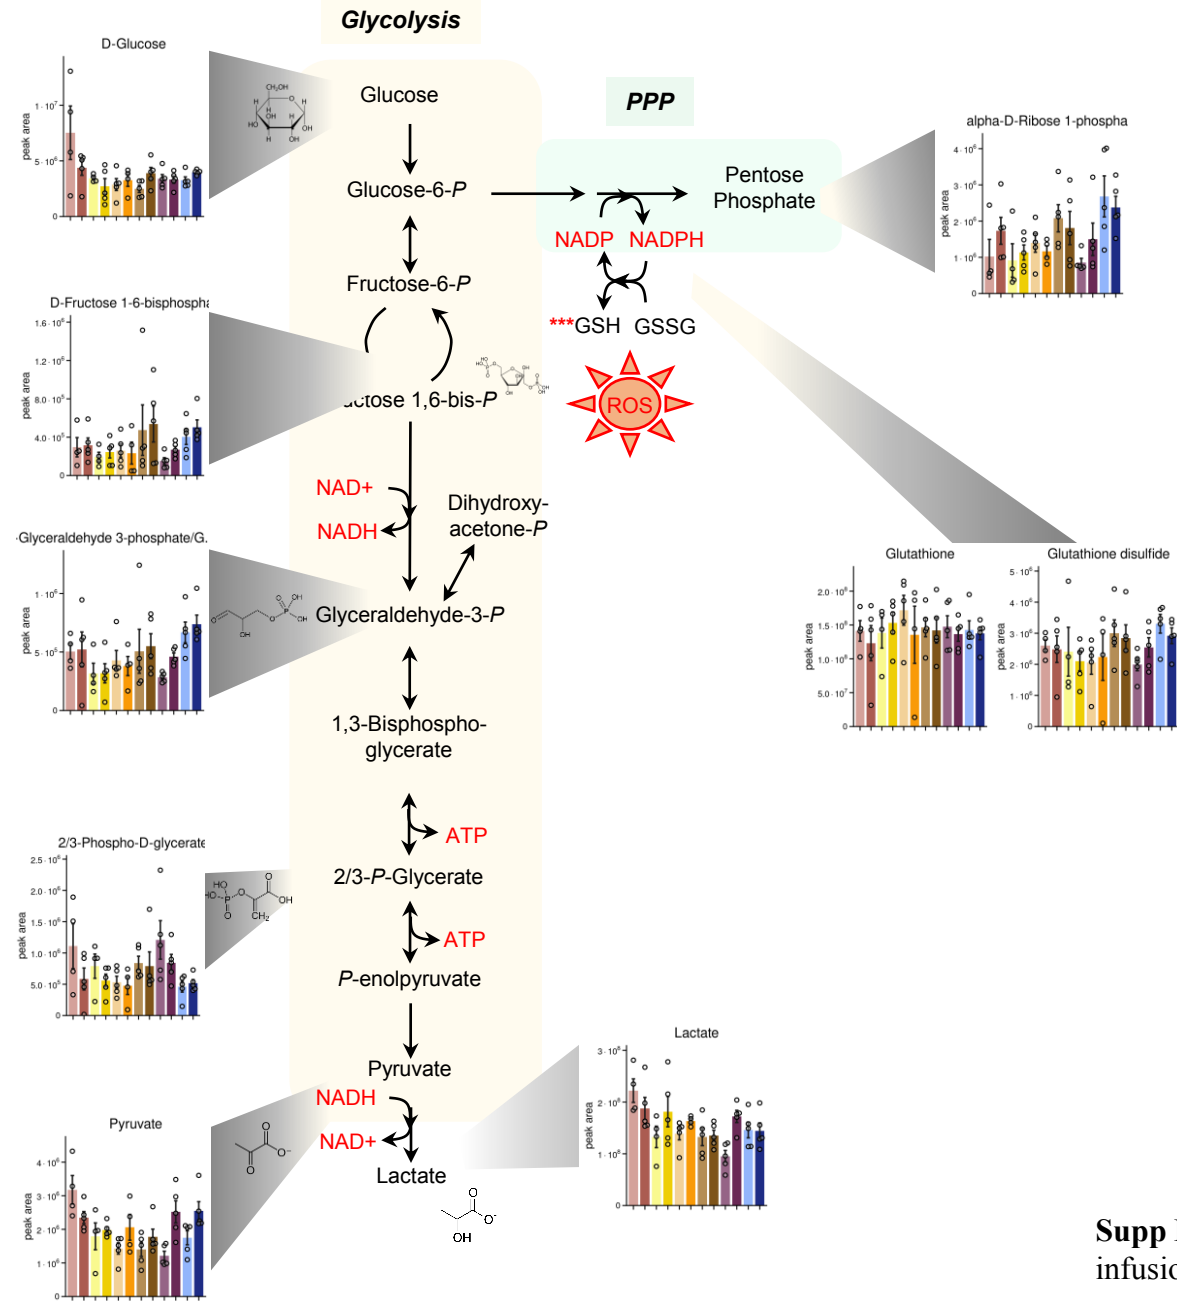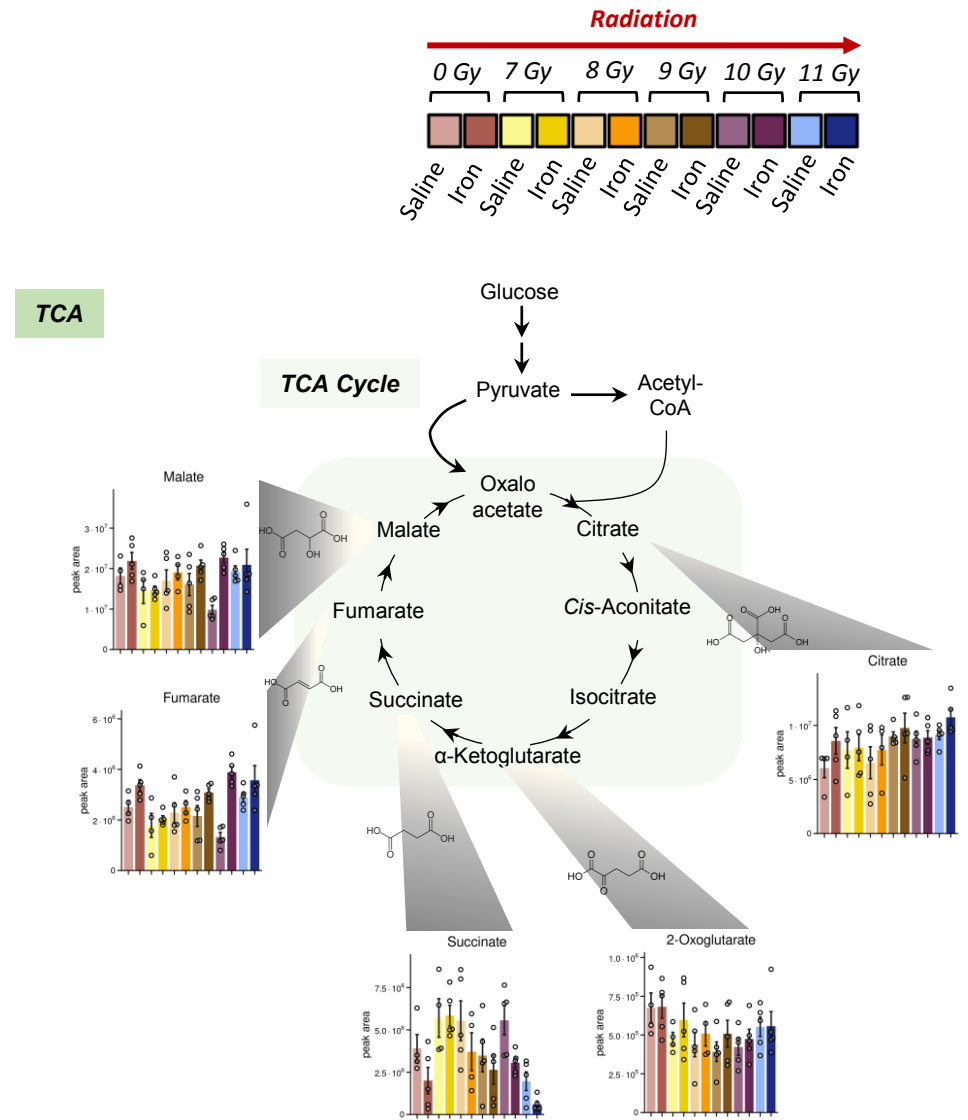

Supp Fig 2.S– Bar plots on the impact of radiation with and without iron infusion in the colon TCA cycle and glycolysis pathway.

# COLON

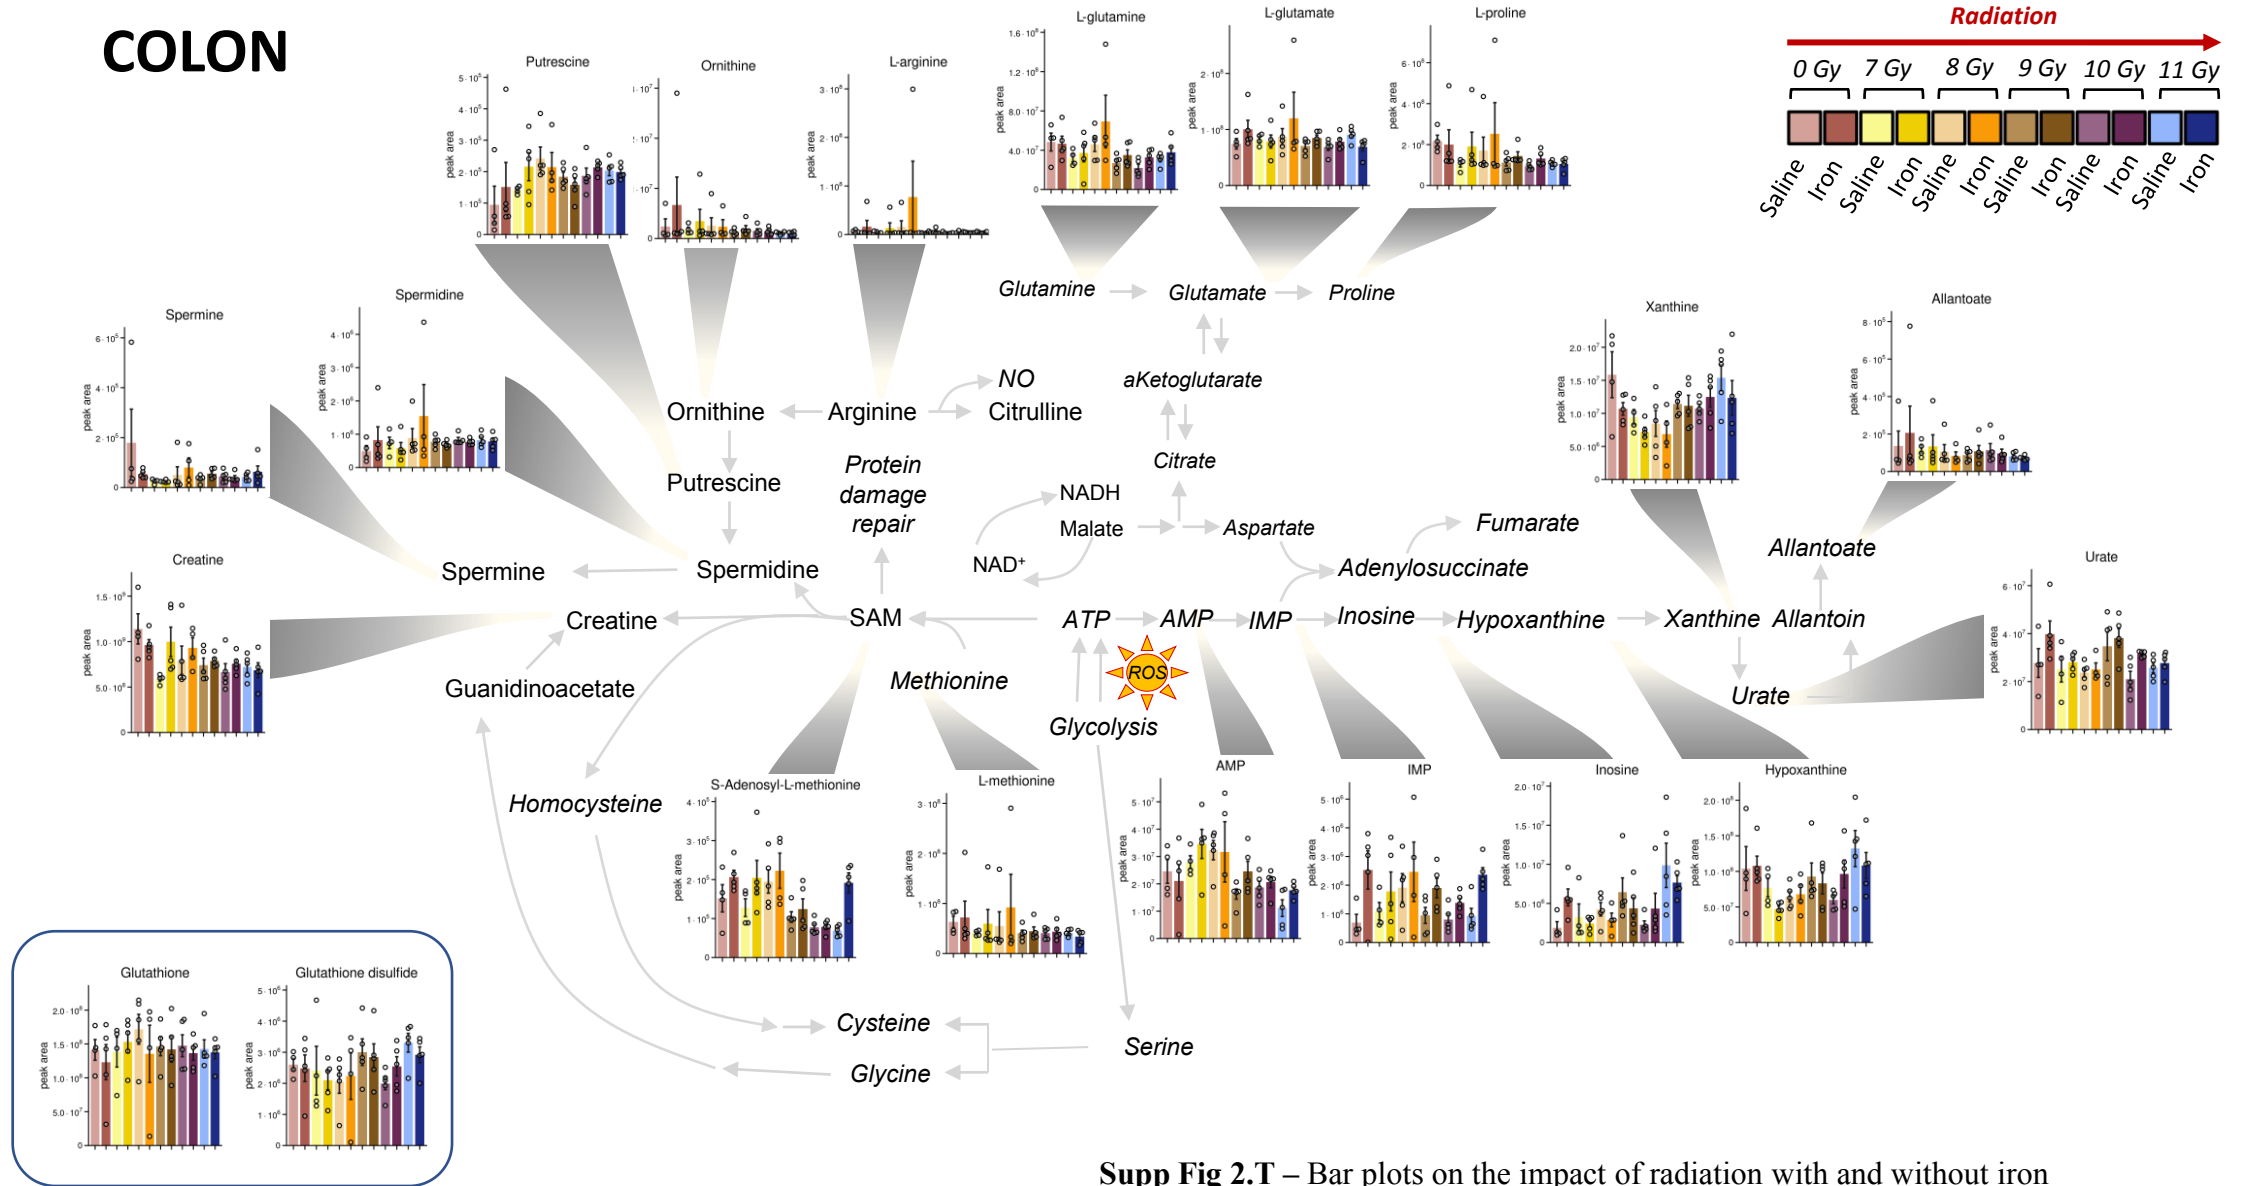

Supp Fig 2.T – Bar plots on the impact of radiation with and without iron infusion in the colon protein damage and repair pathways.

# PRE STOOL

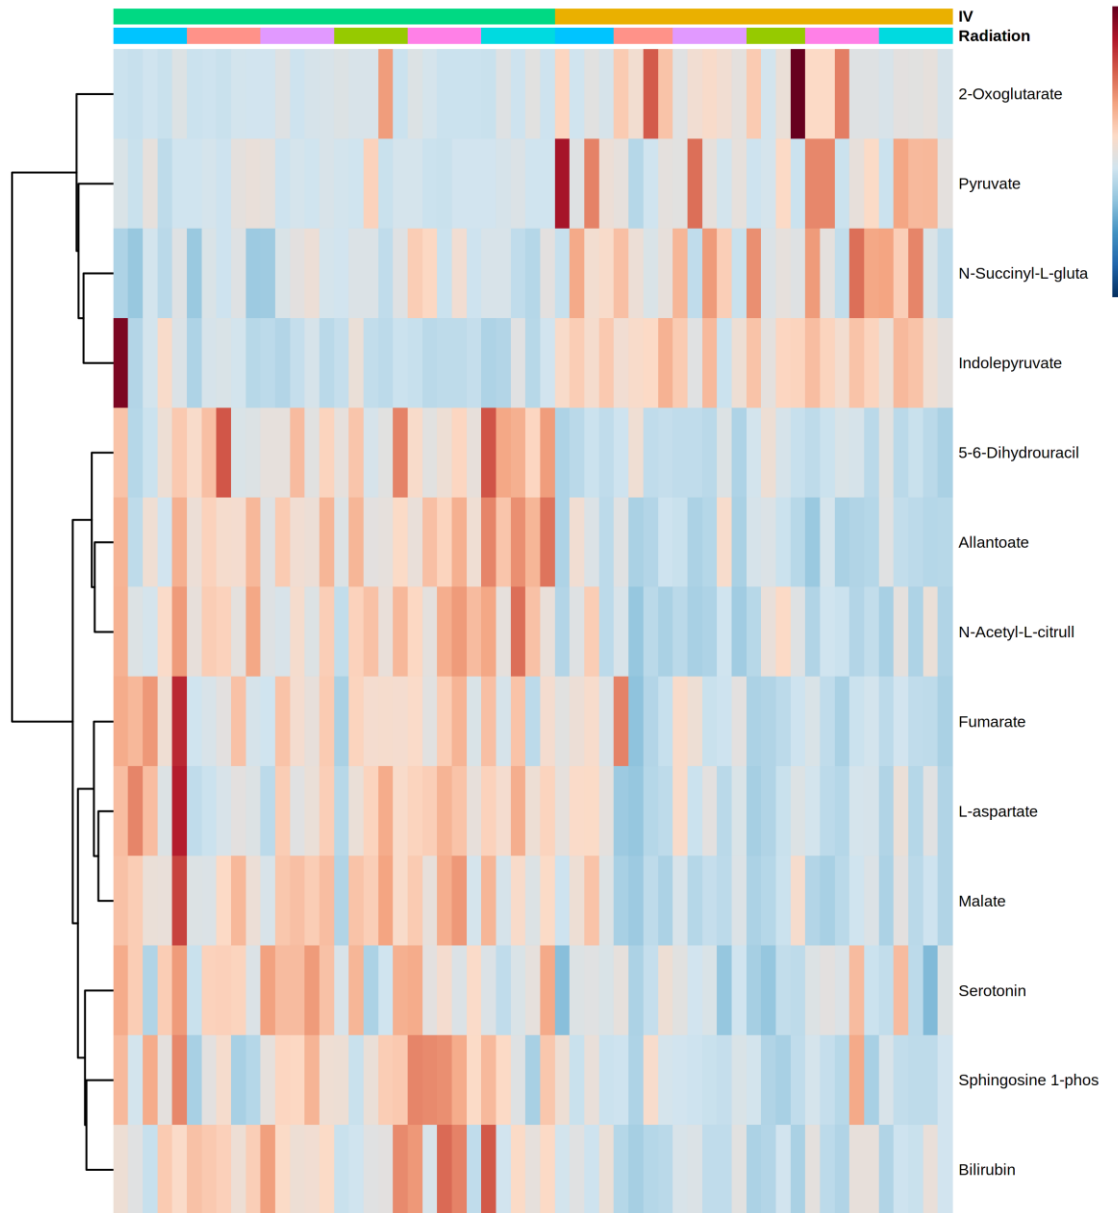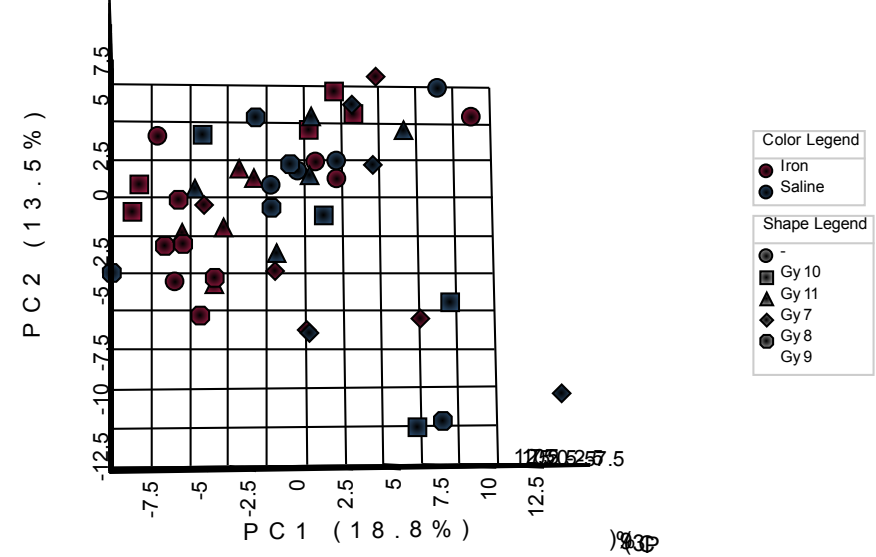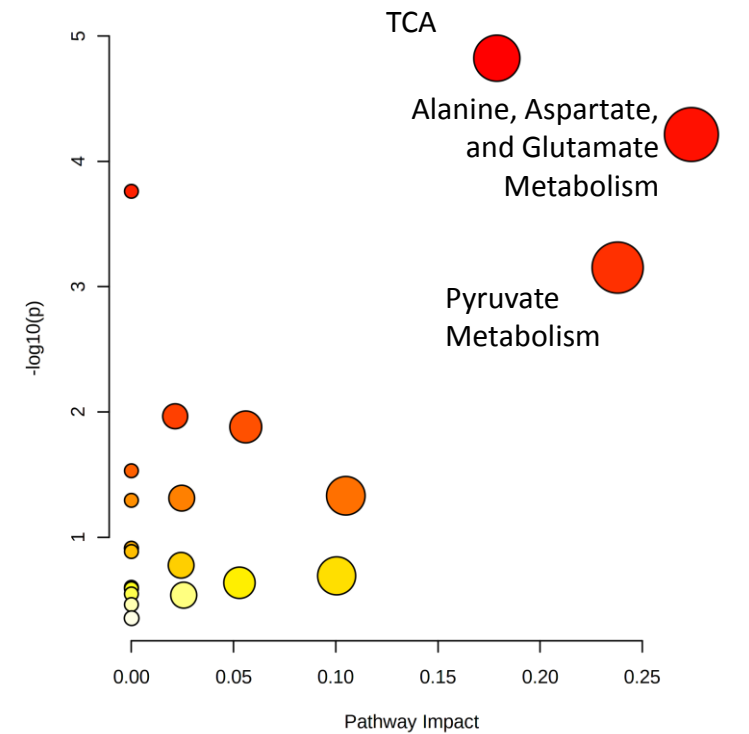

**Supp Fig 2.U** – Heat map (features significant by ANOVA), Principal Component Analysis, and Pathway Analysis of top metabolic effects for stool metabolites prior to radiation with and without iron infusion.

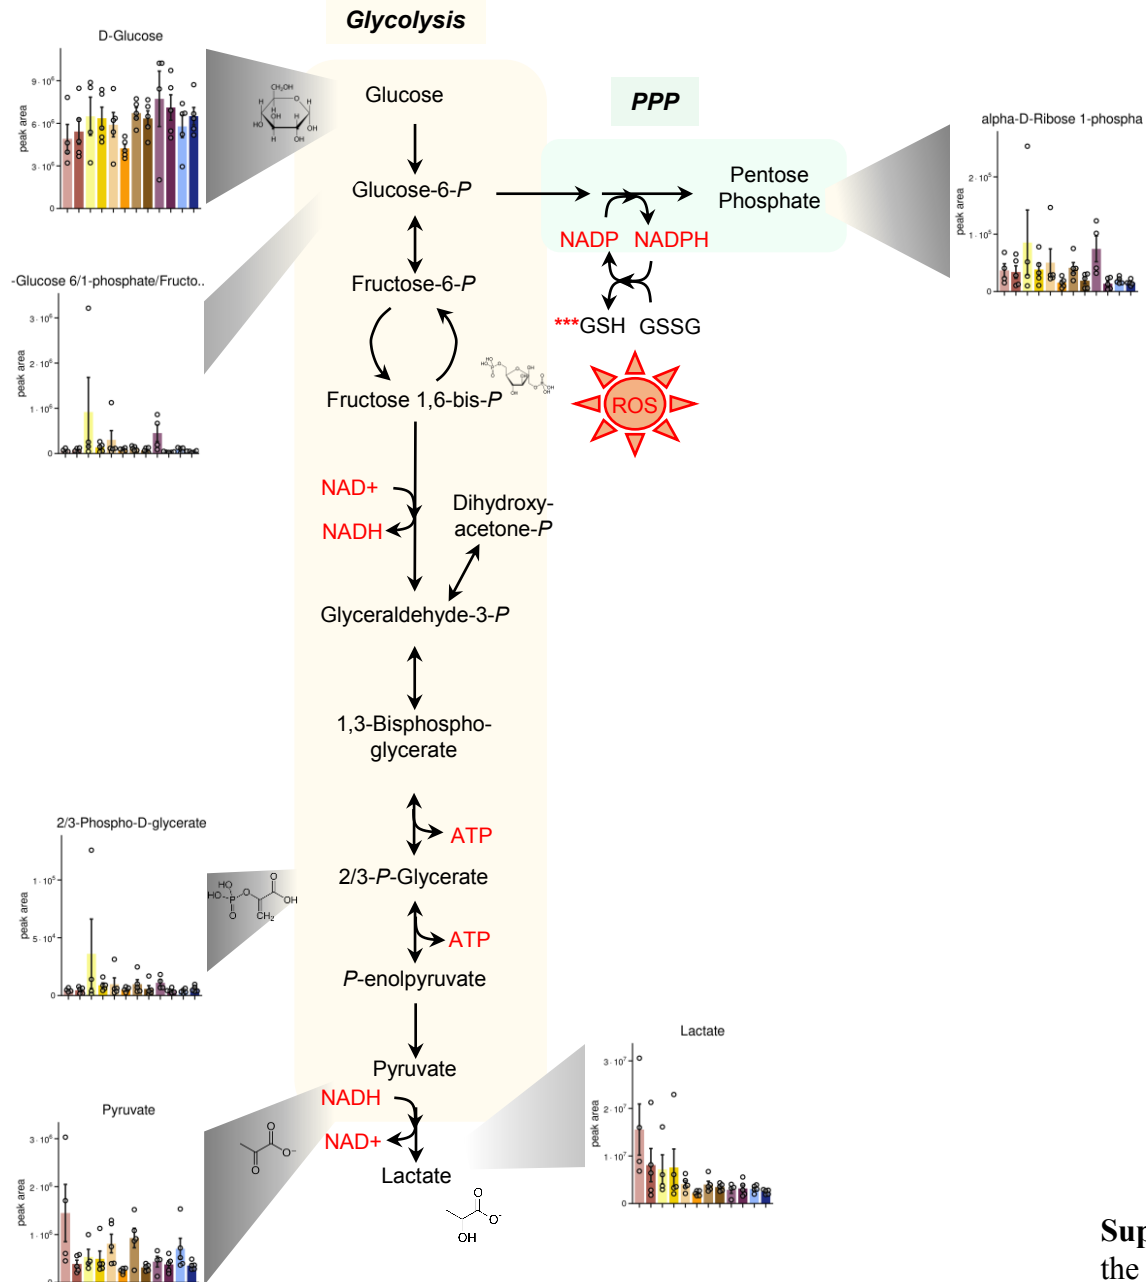

**TCA**

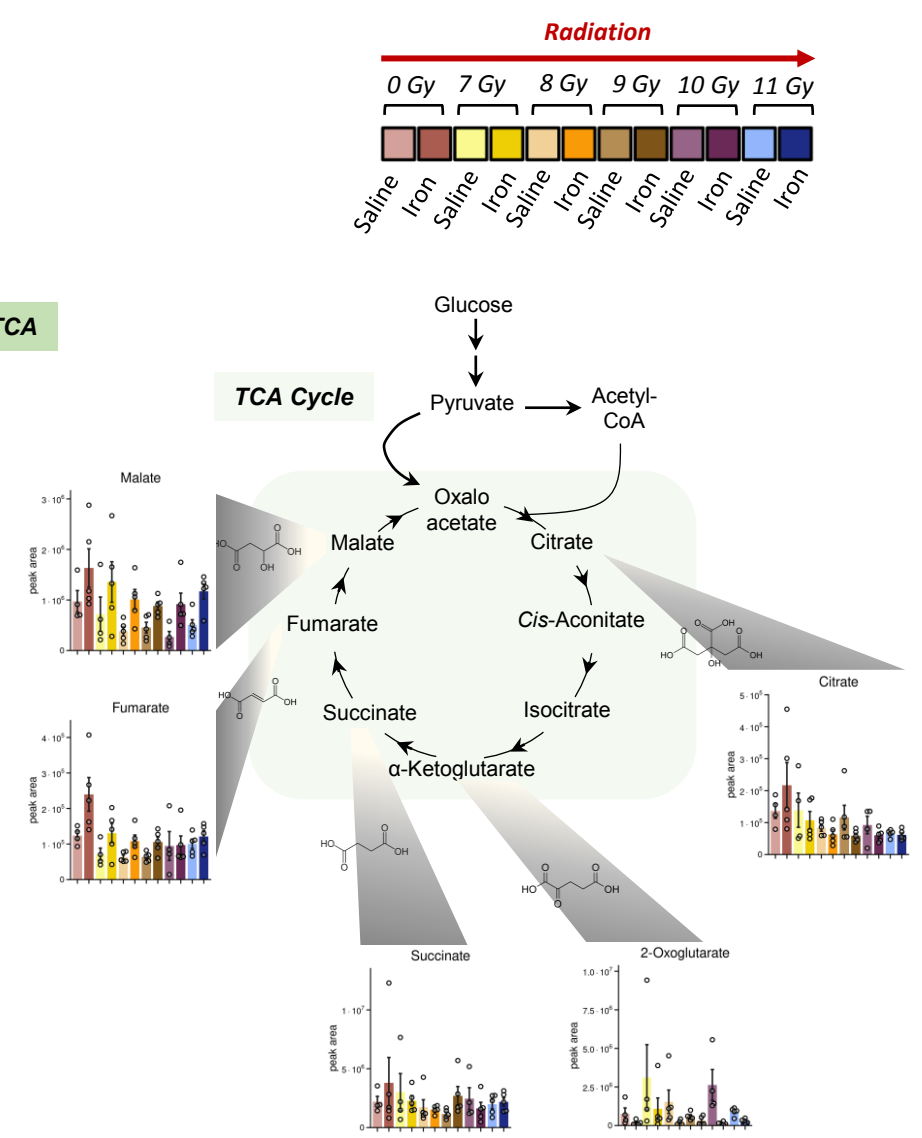

Supp Fig 2.V– Bar plots on the impact of iron infusion (prior to radiation) in the stool TCA cycle and glycolysis pathway.

# POST STOOL

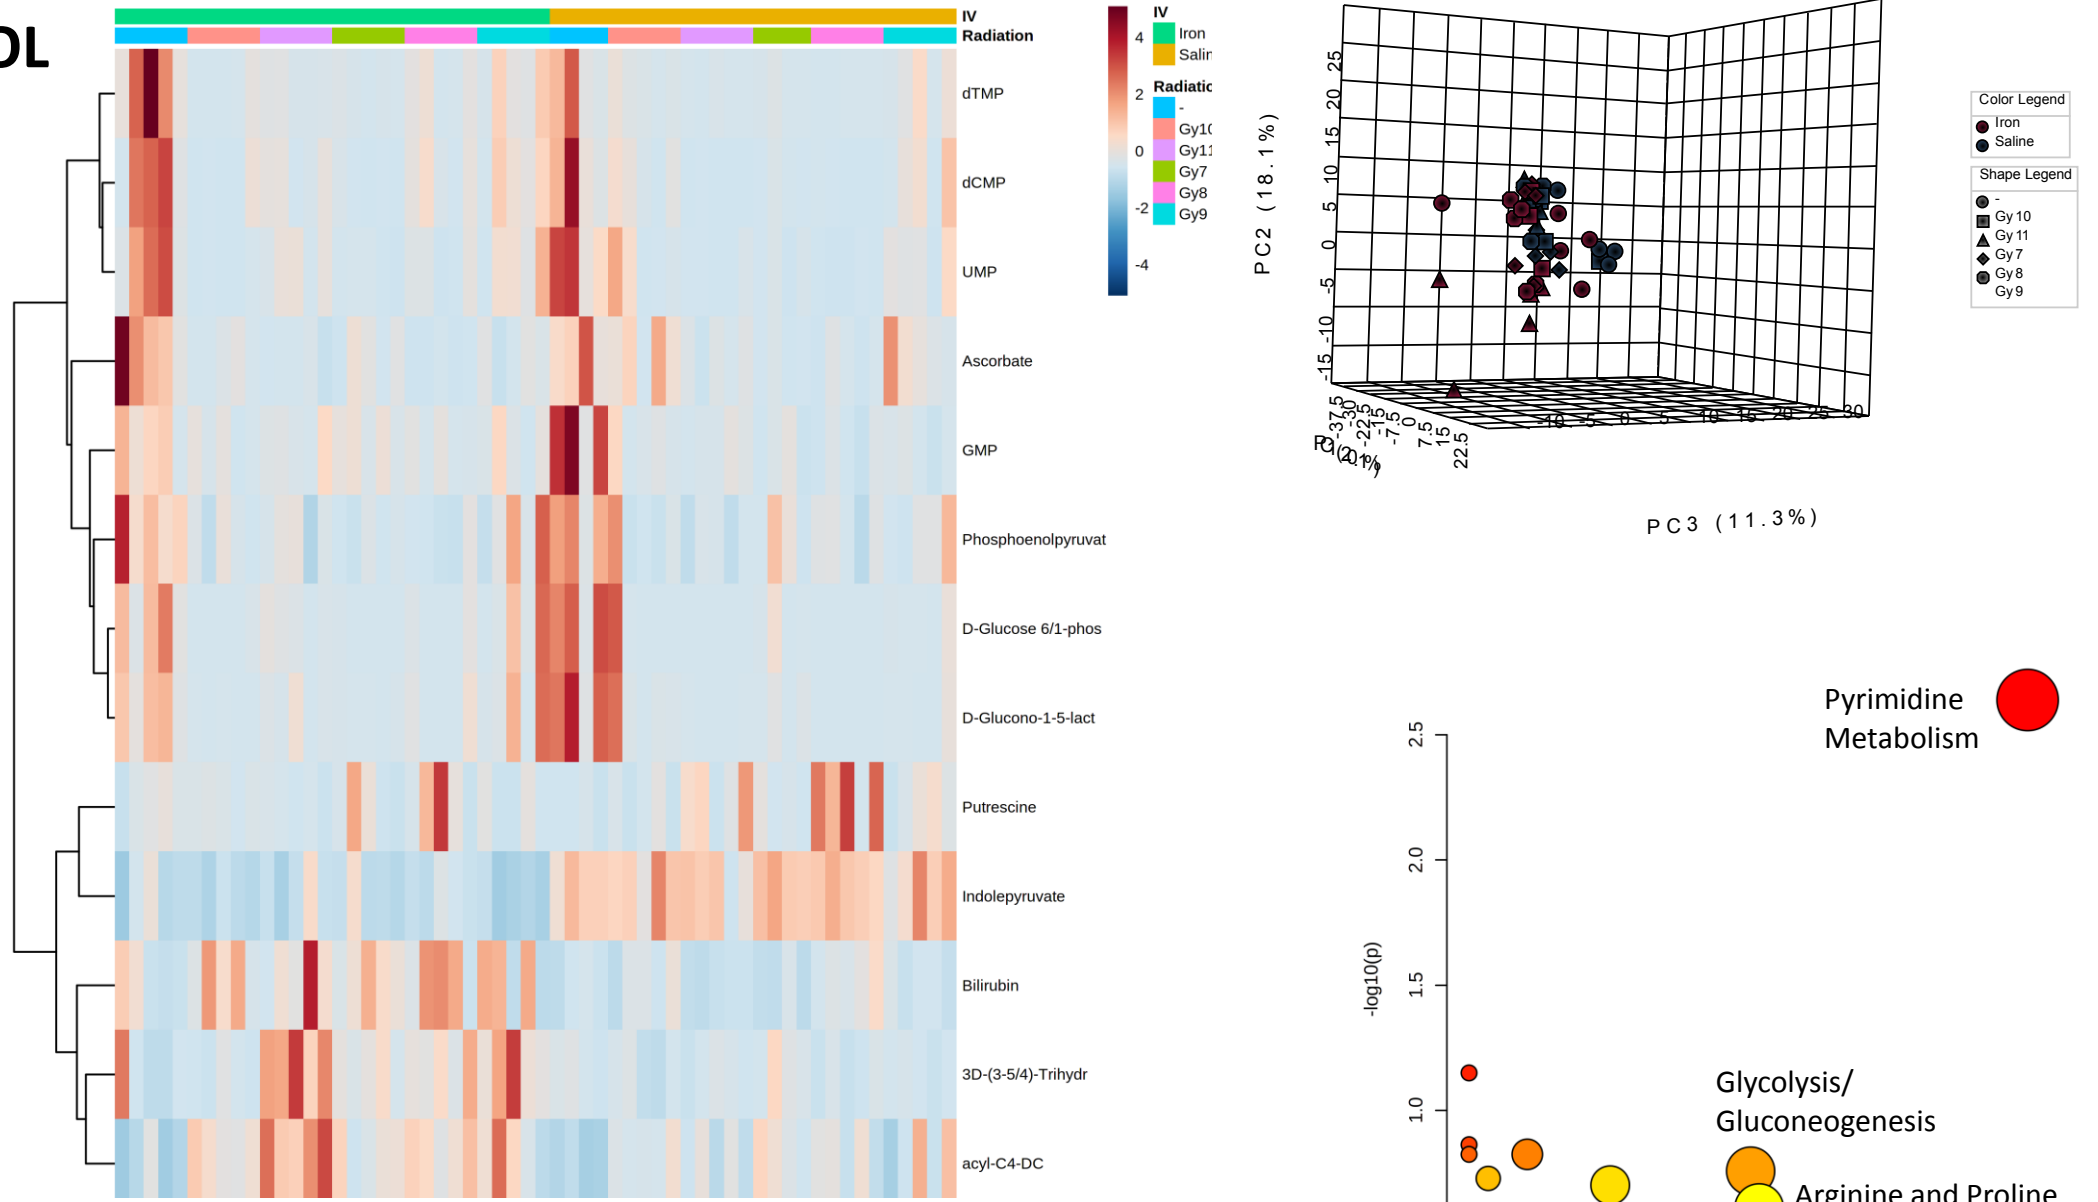

**Supp Fig 2.W** – Heat map (features significant by ANOVA), Principal Component Analysis, and Pathway Analysis of top metabolic effects for stool metabolites in response to radiation with and without iron infusion.

# DUODENUM

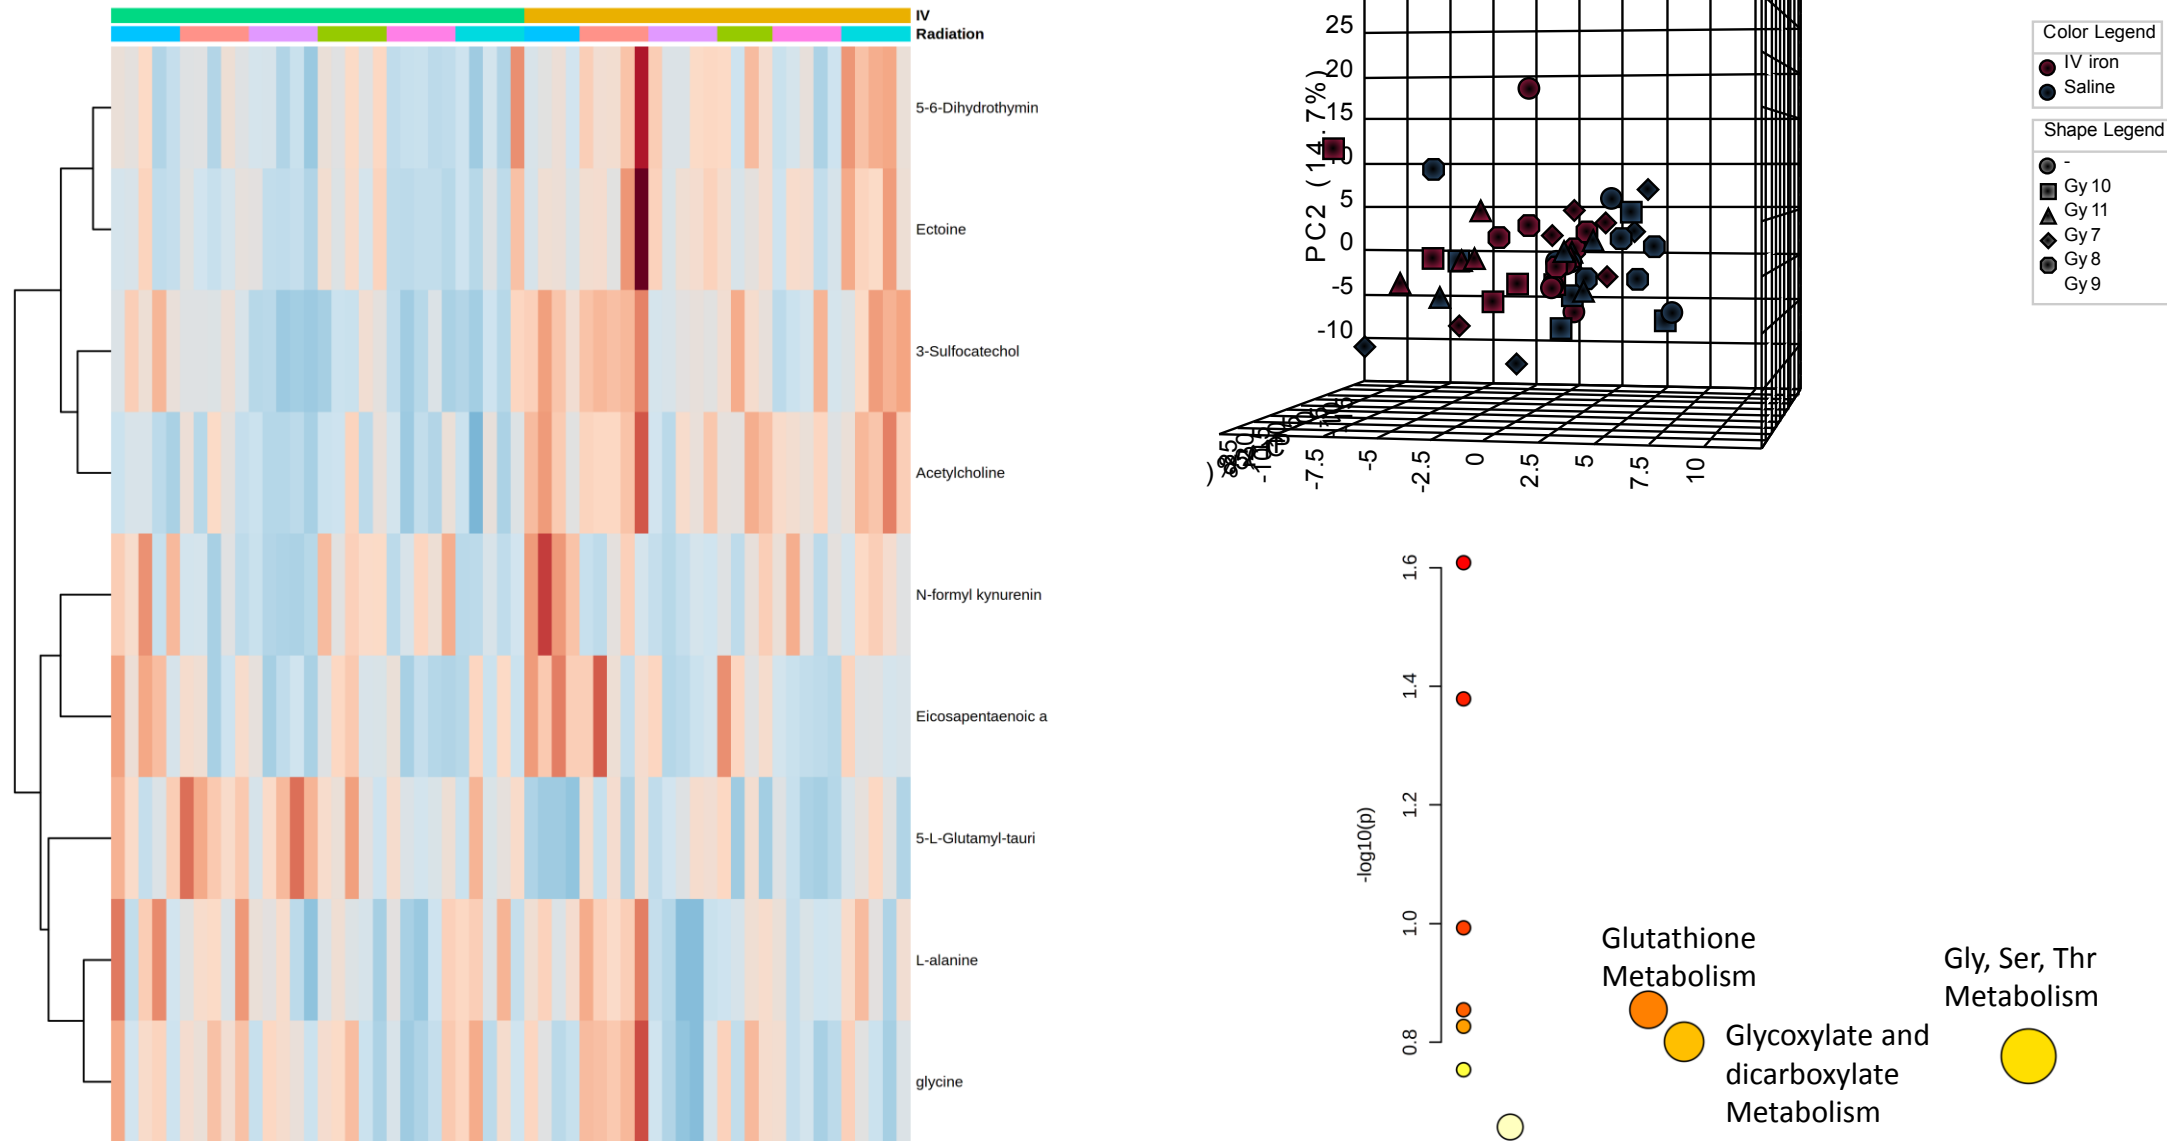

**Supp Fig 2.X** – Heat map (features significant by ANOVA), Principal Component Analysis, and Pathway Analysis of top metabolic effects for duodenum metabolites prior to radiation with and without iron infusion.

# BRAIN

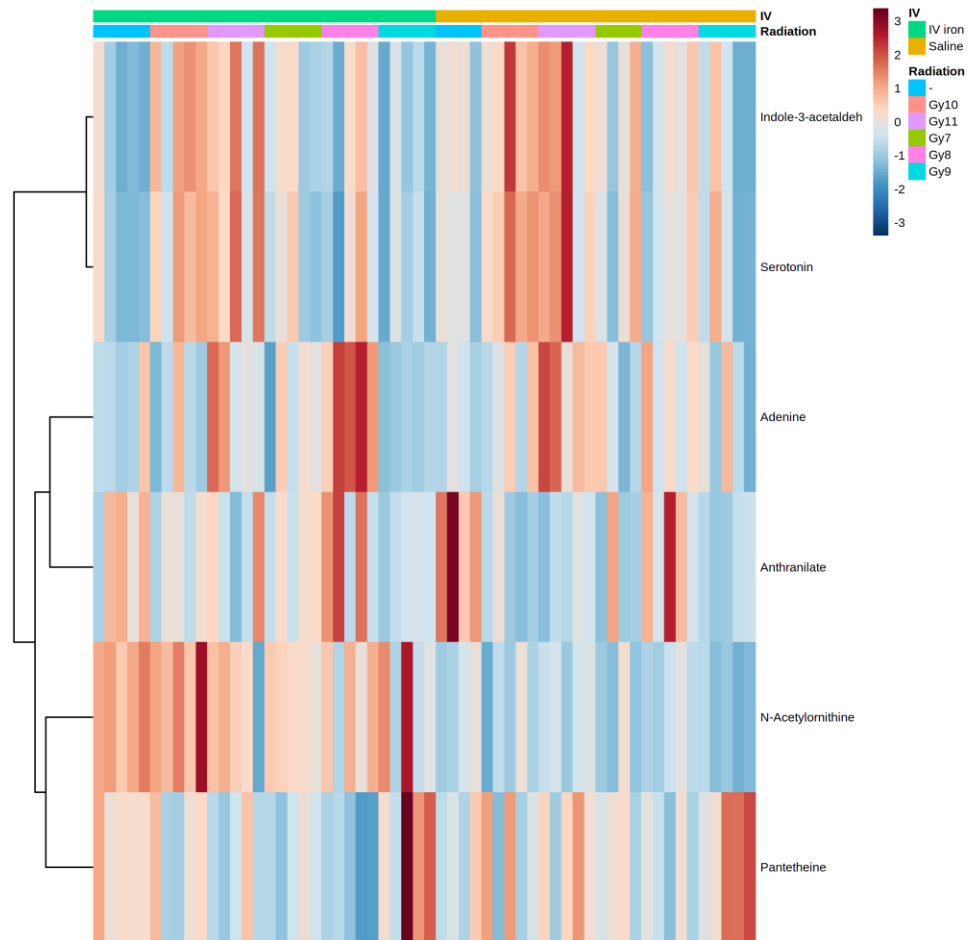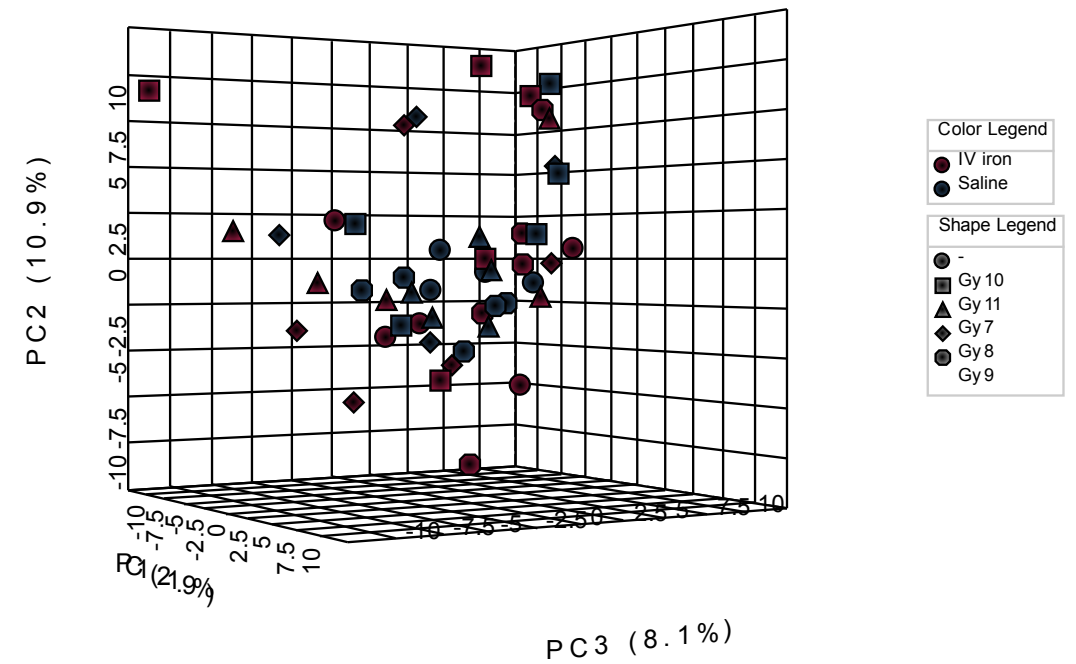

**Supp Fig 2.Y** – Heat map (features significant by ANOVA) and Principal Component Analysis for brain metabolites prior to radiation with and without iron infusion.
